# Supplementary material for: Universal Walking Control Framework of Biped Robot Based on Dynamic Model and Quadratic Programming
Source: Hindawi journal article supplement (doi:10.1155/2020/2789039), 2020-10-31
Supplement: f1 [file 2789039.f1.zip]

Archive with 38 entries (35 files):
- Force control/
- Force control/FT z left
- Force control/FT z right
- Force control/Xzmp
- Force control/Yzmp
- Position control/
- Position control/FT z left
- Position control/FT z right
- Position control/Xzmp
- Position control/Yzmp
- sim/
- sim/angle ankle pitch
- sim/angle ankle roll
- sim/angle hip pitch
- sim/angle hip roll
- sim/angle hip yaw
- sim/angle knee pitch
- sim/msr ankle pitch
- sim/msr ankle roll
- sim/msr hip pitch
- sim/msr hip roll
- sim/msr hip yaw
- sim/msr knee pitch
- sim/speed ankle pitch
- sim/speed ankle roll
- sim/speed hip pitch
- sim/speed hip roll
- sim/speed hip yaw
- sim/speed knee pitch
- sim/speed.png
- sim/torque ankle pitch
- sim/torque ankle roll
- sim/torque hip pitch
- sim/torque hip roll
- sim/torque hip yaw
- sim/torque knee pitch
- sim/Torque.png
- Experimental data description.pdf
