# Supplementary material for: Universal Walking Control Framework of Biped Robot Based on Dynamic Model and Quadratic Programming
Source: Hindawi journal article supplement (doi:10.1155/2020/2789039), 2020-10-31
Supplement: f1 [file 2789039.f1.zip › Force control/FT z left]

0.492000014	264.254944
0.496000022	263.779266
0.5	263.547882
0.504000008	263.812927
0.508000016	264.357849
0.512000024	264.707062
0.516000032	264.59436
0.519999981	265.152496
0.523999989	264.208221
0.527999997	263.981598
0.532000005	263.99173
0.536000013	264.031372
0.540000021	264.089783
0.54400003	264.464966
0.548000038	264.635559
0.551999986	265.389984
0.555999994	264.501068
0.560000002	265.242401
0.56400001	265.010376
0.568000019	263.938751
0.572000027	265.029022
0.576000035	264.690735
0.579999983	263.845612
0.583999991	265.643585
0.588	264.73645
0.592000008	264.961456
0.596000016	264.645355
0.600000024	264.000885
0.604000032	263.940216
0.60799998	264.828186
0.611999989	264.20694
0.615999997	265.081635
0.620000005	264.748688
0.624000013	264.497559
0.628000021	264.669769
0.632000029	264.093414
0.636000037	265.258698
0.639999986	264.702362
0.643999994	264.218262
0.648000002	264.430115
0.65200001	265.061768
0.656000018	265.43927
0.660000026	266.235077
0.664000034	264.125122
0.667999983	265.069794
0.671999991	265.570099
0.675999999	264.904968
0.680000007	264.255524
0.684000015	265.464844
0.688000023	265.201355
0.692000031	265.101654
0.69599998	264.95755
0.699999988	264.176666
0.703999996	264.466553
0.708000004	265.150299
0.712000012	264.458679
0.716000021	265.71936
0.720000029	264.741028
0.724000037	265.483521
0.727999985	265.925903
0.731999993	264.013245
0.736000001	264.264343
0.74000001	265.140991
0.744000018	264.148346
0.748000026	266.239014
0.752000034	264.901123
0.755999982	263.71521
0.75999999	265.558014
0.763999999	263.913269
0.768000007	264.648254
0.772000015	265.362549
0.776000023	265.298584
0.780000031	266.696381
0.783999979	265.24765
0.787999988	263.828827
0.791999996	264.561768
0.796000004	266.098938
0.800000012	264.075562
0.80400002	264.450043
0.808000028	267.082916
0.812000036	267.655945
0.815999985	266.527954
0.819999993	263.967834
0.824000001	263.608551
0.828000009	262.294464
0.832000017	263.509827
0.836000025	264.829803
0.840000033	265.518829
0.843999982	265.910278
0.84799999	265.752167
0.851999998	267.394592
0.856000006	263.85965
0.860000014	265.453217
0.864000022	264.127136
0.868000031	264.774902
0.871999979	265.113922
0.875999987	267.229156
0.879999995	265.883484
0.884000003	264.074921
0.888000011	264.515717
0.89200002	266.300049
0.896000028	264.617859
0.900000036	265.185211
0.903999984	270.584564
0.907999992	269.649719
0.912	270.33905
0.916000009	270.893433
0.920000017	271.483276
0.924000025	270.364563
0.928000033	273.387482
0.931999981	273.50174
0.93599999	274.059265
0.939999998	281.440369
0.944000006	283.99118
0.948000014	285.374268
0.952000022	285.597046
0.95600003	288.493774
0.959999979	288.882477
0.963999987	290.919586
0.967999995	294.112396
0.972000003	295.285736
0.976000011	295.698395
0.980000019	297.395844
0.984000027	301.016571
0.988000035	302.693481
0.991999984	302.987793
0.995999992	305.989136
1	305.938934
1.00399995	309.578735
1.0079999	311.337311
1.01199996	313.187897
1.01599991	314.956512
1.01999998	315.357513
1.02399993	318.032532
1.028	320.736084
1.03199995	323.784302
1.03599989	327.610748
1.03999996	327.268188
1.04399991	330.572693
1.04799998	331.312531
1.05199993	332.981232
1.05599999	333.835236
1.05999994	336.695648
1.06399989	339.488007
1.06799996	342.153412
1.07199991	344.381653
1.07599998	345.862335
1.07999992	350.209351
1.08399999	353.41095
1.08799994	355.230652
1.09200001	359.240234
1.09599996	362.622833
1.0999999	365.629608
1.10399997	542.222595
1.10799992	545.10376
1.11199999	543.310181
1.11599994	543.130188
1.12	542.809143
1.12399995	542.31604
1.1279999	541.852295
1.13199997	543.113708
1.13599992	540.254028
1.13999999	542.14563
1.14399993	539.333923
1.148	539.887634
1.15199995	540.508057
1.1559999	542.37738
1.15999997	539.602173
1.16399992	540.387268
1.16799998	540.673523
1.17199993	540.874329
1.176	541.010498
1.17999995	541.375427
1.1839999	540.932678
1.18799996	541.199829
1.19199991	541.465271
1.19599998	543.374207
1.19999993	540.498657
1.204	543.179321
1.20799994	542.3349
1.21199989	540.921753
1.21599996	541.93866
1.21999991	542.455811
1.22399998	544.035706
1.22799993	542.065735
1.23199999	542.818298
1.23599994	543.181213
1.23999989	544.66272
1.24399996	542.670227
1.24799991	543.418152
1.25199997	543.784607
1.25599992	545.295166
1.25999999	543.277771
1.26399994	543.911926
1.26800001	544.244751
1.27199996	545.621765
1.2759999	544.809998
1.27999997	544.598877
1.28399992	543.186951
1.28799999	544.269958
1.29199994	544.679016
1.296	546.062988
1.29999995	545.189575
1.3039999	543.714233
1.30799997	545.551392
1.31199992	543.829895
1.31599998	544.482605
1.31999993	545.824768
1.324	545.001099
1.32799995	543.530579
1.3319999	544.158203
1.33599997	544.374573
1.33999991	544.374207
1.34399998	544.310974
1.34799993	544.176819
1.352	543.773987
1.35599995	545.262939
1.3599999	544.07782
1.36399996	543.561035
1.36799991	543.260925
1.37199998	543.086731
1.37599993	542.954224
1.38	542.704956
1.38399994	541.08667
1.38799989	543.598022
1.39199996	542.663574
1.39599991	540.596497
1.39999998	543.005859
1.40399992	541.953979
1.40799999	539.838135
1.41199994	542.197754
1.41599989	541.190186
1.41999996	540.657288
1.42399991	540.264404
1.42799997	538.412109
1.43199992	540.877991
1.43599999	539.938232
1.43999994	539.398804
1.44400001	539.02356
1.44799995	538.719727
1.4519999	538.492065
1.45599997	536.58252
1.45999992	539.193787
1.46399999	536.542175
1.46799994	538.863159
1.472	536.06189
1.47599995	538.387756
1.4799999	537.245544
1.48399997	536.761047
1.48799992	536.440002
1.49199998	536.26239
1.49599993	534.424255
1.5	537.254028
1.50399995	536.370483
1.5079999	535.934998
1.51199996	533.903625
1.51599991	536.687683
1.51999998	535.67572
1.52399993	535.226196
1.528	534.877563
1.53199995	532.847778
1.53599989	535.658081
1.53999996	532.831665
1.54399991	533.530334
1.54799998	535.421997
1.55199993	533.953064
1.55599999	533.19928
1.55999994	532.751648
1.56399989	530.588379
1.56799996	533.436829
1.57199991	530.500549
1.57599998	533.016296
1.57999992	531.72522
1.58399999	531.030945
1.58799994	530.544678
1.59200001	530.188416
1.59599996	529.899048
1.5999999	529.602051
1.60399997	527.656982
1.60799992	528.472229
1.61199999	528.563599
1.61599994	528.376038
1.62	528.056702
1.62399995	527.690063
1.6279999	527.154297
1.63199997	525.406067
1.63599992	527.267761
1.63999999	523.811218
1.64399993	527.265808
1.648	526.349915
1.65199995	526.04248
1.6559999	525.704773
1.65999997	527.505066
1.66399992	523.799927
1.66799998	526.580322
1.67199993	523.211975
1.676	526.247009
1.67999995	522.909668
1.6839999	526.05365
1.68799996	524.806946
1.69199991	522.254456
1.69599998	525.703125
1.69999993	524.663269
1.704	522.19696
1.70799994	525.701294
1.71199989	524.727539
1.71599996	522.338562
1.71999991	523.760681
1.72399998	526.56311
1.72799993	523.190857
1.73199999	526.579712
1.73599994	525.498413
1.73999989	525.292786
1.74399996	523.298523
1.74799991	527.231995
1.75199997	526.529297
1.75599992	526.496521
1.75999999	526.659485
1.76399994	527.005188
1.76800001	527.397827
1.77199996	527.800354
1.7759999	528.240356
1.77999997	528.708313
1.78399992	529.143738
1.78799999	527.505371
1.79199994	531.628113
1.796	531.150879
1.79999995	529.249756
1.8039999	533.215088
1.80799997	530.63031
1.81199992	532.390869
1.81599998	533.333862
1.81999993	536.15033
1.824	533.200745
1.82799995	536.001892
1.8319999	534.106079
1.83599997	538.121338
1.83999991	537.687012
1.84399998	538.031372
1.84799993	537.215271
1.852	538.069153
1.85599995	539.933105
1.8599999	539.694092
1.86399996	540.684814
1.86799991	542.160156
1.87199998	542.247437
1.87599993	542.863525
1.88	543.229126
1.88399994	543.190369
1.88799989	543.585327
1.89199996	544.142273
1.89599991	544.834778
1.89999998	545.867371
1.90399992	378.333008
1.90799999	338.248566
1.91199994	310.921814
1.91599989	268.413239
1.91999996	391.340088
1.92399991	406.997345
1.92799997	317.532715
1.93199992	317.462921
1.93599999	313.061859
1.93999994	360.768219
1.94400001	396.653778
1.94799995	420.365234
1.9519999	429.414978
1.95599997	432.845032
1.95999992	458.63623
1.96399999	431.15979
1.96799994	416.972992
1.972	409.824036
1.97599995	397.295929
1.9799999	386.055237
1.98399997	372.096527
1.98799992	359.983398
1.99199998	343.781769
1.99599993	319.597595
2	306.0065
2.00399995	298.788361
2.0079999	290.376129
2.01199985	283.996857
2.01600003	290.85556
2.01999998	300.105621
2.02399993	311.138428
2.02799988	320.62265
2.03200006	309.921265
2.03600001	316.311584
2.03999996	299.263885
2.04399991	260.671356
2.04799986	231.324875
2.05200005	237.819138
2.05599999	241.311066
2.05999994	243.470551
2.06399989	244.000626
2.06799984	239.157745
2.07200003	230.913803
2.07599998	222.131668
2.07999992	217.81636
2.08399987	208.376862
2.08800006	206.755554
2.09200001	197.871674
2.09599996	191.084
2.0999999	184.126129
2.10399985	-26.2349968
2.10800004	-20.9593716
2.11199999	-20.881155
2.11599994	-20.7831345
2.11999989	-20.9045601
2.12399983	-20.9317894
2.12800002	-20.9198589
2.13199997	-20.8773022
2.13599992	-20.8197193
2.13999987	-20.7469578
2.14400005	-20.7230358
2.148	-20.6702175
2.15199995	-20.6704807
2.1559999	-20.6570129
2.15999985	-20.6580753
2.16400003	-20.6660194
2.16799998	-20.688406
2.17199993	-20.7111778
2.17599988	-20.7307739
2.18000007	-20.7492104
2.18400002	-20.7526703
2.18799996	-20.785183
2.19199991	-20.8034821
2.19599986	-20.8204212
2.20000005	-20.8387241
2.204	-20.8371353
2.20799994	-20.8842602
2.21199989	-20.8998604
2.21599984	-20.8997974
2.22000003	-20.9313736
2.22399998	-20.9826965
2.22799993	-20.9939728
2.23199987	-21.0108948
2.23600006	-21.0303288
2.24000001	-21.05056
2.24399996	-21.0679836
2.24799991	-21.08255
2.25199986	-21.0900574
2.25600004	-21.1179695
2.25999999	-21.1178532
2.26399994	-21.1176682
2.26799989	-21.1061535
2.27199984	-21.1114101
2.27600002	-21.0947838
2.27999997	-21.0674591
2.28399992	-21.0455227
2.28799987	-21.0197792
2.29200006	-20.9954395
2.296	-20.9421444
2.29999995	-20.9082661
2.3039999	-20.8551922
2.30799985	-20.7988873
2.31200004	-20.7414799
2.31599998	-20.6730175
2.31999993	-20.6260548
2.32399988	-20.5619755
2.32799983	-20.4953728
2.33200002	-20.4182816
2.33599997	-20.3610058
2.33999991	-20.287096
2.34399986	-20.2077904
2.34800005	-20.1194954
2.352	-20.044239
2.35599995	-19.9672451
2.3599999	-19.8872261
2.36399984	-19.8046055
2.36800003	-19.725708
2.37199998	-19.6282768
2.37599993	-19.5418015
2.37999988	-19.4597034
2.38400006	-19.3619289
2.38800001	-19.2801094
2.39199996	-19.1823025
2.39599991	-19.1007671
2.39999986	-19.0054359
2.40400004	-18.9196529
2.40799999	-18.8328342
2.41199994	-18.7509384
2.41599989	-18.6717911
2.41999984	-18.5848026
2.42400002	-18.5008335
2.42799997	-18.4156818
2.43199992	-18.3461761
2.43599987	-18.2717991
2.44000006	-18.1947937
2.44400001	-18.1280022
2.44799995	-18.0670319
2.4519999	-18.0025673
2.45599985	-17.9423122
2.46000004	-17.894537
2.46399999	-17.8508759
2.46799994	-17.8116627
2.47199988	-17.7763443
2.47599983	-17.7479401
2.48000002	-17.721529
2.48399997	-17.7061367
2.48799992	-17.6998558
2.49199986	-17.7025471
2.49600005	-17.7116146
2.5	-17.7302494
2.50399995	-17.7553654
2.5079999	-17.7741795
2.51199985	-17.787962
2.51600003	-17.7982044
2.51999998	-17.8045082
2.52399993	-17.8062553
2.52799988	-17.8058338
2.53200006	-17.8023815
2.53600001	-17.7970772
2.53999996	-17.7889118
2.54399991	-17.7781868
2.54799986	-17.764658
2.55200005	-17.7491226
2.55599999	-17.7312927
2.55999994	-17.711977
2.56399989	-17.6904087
2.56799984	-17.6672268
2.57200003	-17.6427002
2.57599998	-17.6172123
2.57999992	-17.5915298
2.58399987	-17.5647182
2.58800006	-17.5381794
2.59200001	-17.5108452
2.59599996	-17.4848576
2.5999999	-17.4600449
2.60399985	-17.4365215
2.60800004	-17.414423
2.61199999	-17.3936749
2.61599994	-17.3741283
2.61999989	-17.3568974
2.62399983	-17.3413181
2.62800002	-17.3271332
2.63199997	-17.315506
2.63599992	-17.3061829
2.63999987	-17.3001251
2.64400005	-17.2957573
2.648	-17.2938652
2.65199995	-17.2964382
2.6559999	-17.3015881
2.65999985	-17.3107109
2.66400003	-17.3221226
2.66799998	-17.3389893
2.67199993	-17.3578472
2.67599988	-17.3803635
2.68000007	-17.4070797
2.68400002	-17.4374065
2.68799996	-17.4710712
2.69199991	-17.5086765
2.69599986	-17.5495205
2.70000005	-17.5940552
2.704	-17.6415749
2.70799994	-17.693903
2.71199989	-17.7484398
2.71599984	-17.8077869
2.72000003	-17.8696728
2.72399998	-17.9357738
2.72799993	-18.0047741
2.73199987	-18.0776997
2.73600006	-18.1546326
2.74000001	-18.2346115
2.74399996	-18.3181801
2.74799991	-18.4045753
2.75199986	-18.493885
2.75600004	-18.5788269
2.75999999	-18.6699162
2.76399994	-18.7686043
2.76799989	-18.8791656
2.77199984	-18.9806747
2.77600002	-19.0846615
2.77999997	-19.191021
2.78399992	-19.2970886
2.78799987	-19.4052391
2.79200006	-19.5133495
2.796	-19.6216316
2.79999995	-19.7287121
2.8039999	-19.8460789
2.80799985	-19.9444332
2.81200004	-20.0460529
2.81599998	-20.1468639
2.81999993	-20.2477283
2.82399988	-20.3471737
2.82799983	-20.4442749
2.83200002	-20.5380325
2.83599997	-20.6292
2.83999991	-20.7298679
2.84399986	-20.8004875
2.84800005	-20.8734493
2.852	-20.9408817
2.85599995	-21.0032997
2.8599999	-21.0599308
2.86399984	-21.1107101
2.86800003	-21.1531334
2.87199998	-21.1854496
2.87599993	-21.2099018
2.87999988	-21.2244091
2.88400006	-21.2292442
2.88800001	-21.2235146
2.89199996	-21.2073288
2.89599991	-21.1795826
2.89999986	-21.1368504
2.90400004	-14.141037
2.90799999	118.225807
2.91199994	232.675751
2.91599989	147.768997
2.91999984	120.167053
2.92400002	131.023193
2.92799997	134.625183
2.93199992	125.911064
2.93599987	109.600876
2.94000006	112.191521
2.94400001	126.558563
2.94799995	150.462112
2.9519999	130.33136
2.95599985	140.449356
2.96000004	167.916992
2.96399999	168.903732
2.96799994	165.933289
2.97199988	168.005219
2.97599983	169.641968
2.98000002	179.190613
2.98399997	191.461487
2.98799992	203.05336
2.99199986	208.588593
2.99600005	212.801102
3	215.053116
3.00399995	220.468872
3.0079999	231.004593
3.01199985	241.788345
3.01600003	275.767578
3.01999998	336.292969
3.02399993	378.817047
3.02799988	359.078186
3.03200006	329.254211
3.03600001	300.881714
3.03999996	282.882721
3.04399991	281.90802
3.04799986	288.180267
3.05200005	306.836945
3.05599999	329.0271
3.05999994	341.739777
3.06399989	345.725708
3.06799984	343.165436
3.07200003	339.165283
3.07599998	335.738251
3.07999992	334.674561
3.08399987	336.40506
3.08800006	340.777557
3.09200001	346.186768
3.09599996	352.772064
3.0999999	360.506805
3.10399985	542.178467
3.10800004	560.284363
3.11199999	560.741211
3.11599994	558.984009
3.11999989	557.069641
3.12399983	556.177063
3.12800002	556.366577
3.13199997	555.067993
3.13599992	554.567444
3.13999987	553.669434
3.14400005	554.200806
3.148	553.195984
3.15199995	554.711487
3.1559999	553.58783
3.15999985	554.123718
3.16400003	551.708618
3.16799998	549.925598
3.17199993	549.235474
3.17599988	549.517944
3.18000007	550.331421
3.18400002	549.015869
3.18799996	549.446472
3.19199991	550.097229
3.19599986	550.979553
3.20000005	551.667114
3.204	552.216003
3.20799994	552.46814
3.21199989	552.787354
3.21599984	552.898865
3.22000003	552.934692
3.22399998	552.631836
3.22799993	552.417969
3.23199987	552.269592
3.23600006	552.291565
3.24000001	551.876343
3.24399996	551.612
3.24799991	551.464783
3.25199986	551.330566
3.25600004	551.164978
3.25999999	551.217224
3.26399994	551.239197
3.26799989	551.519836
3.27199984	551.255798
3.27600002	551.166992
3.27999997	551.118408
3.28399992	551.020569
3.28799987	550.93927
3.29200006	550.8349
3.296	550.827332
3.29999995	550.555054
3.3039999	550.420593
3.30799985	550.488525
3.31200004	550.171143
3.31599998	549.918457
3.31999993	549.906494
3.32399988	549.269714
3.32799983	548.954285
3.33200002	548.663452
3.33599997	549.328674
3.33999991	548.95636
3.34399986	196.777985
3.34800005	690.506897
3.352	597.963562
3.35599995	577.356628
3.3599999	569.366028
3.36399984	566.607361
3.36800003	565.498535
3.37199998	563.63031
3.37599993	561.335876
3.37999988	558.717102
3.38400006	556.271362
3.38800001	554.329102
3.39199996	552.558716
3.39599991	551.339783
3.39999986	550.120178
3.40400004	549.32843
3.40799999	548.531067
3.41199994	547.767212
3.41599989	546.887085
3.41999984	546.287109
3.42400002	545.981689
3.42799997	545.656555
3.43199992	544.861389
3.43599987	544.442749
3.44000006	544.087219
3.44400001	543.85083
3.44799995	543.219788
3.4519999	543.602783
3.45599985	543.266357
3.46000004	542.703308
3.46399999	542.552734
3.46799994	542.191223
3.47199988	541.729126
3.47599983	541.374939
3.48000002	541.729065
3.48399997	540.674866
3.48799992	540.844666
3.49199986	541.634583
3.49600005	540.183044
3.5	538.868774
3.50399995	539.449341
3.5079999	540.447876
3.51199985	542.077332
3.51600003	541.034851
3.51999998	541.246338
3.52399993	540.524414
3.52799988	540.572144
3.53200006	539.957825
3.53600001	540.082397
3.53999996	540.211548
3.54399991	539.869568
3.54799986	538.830261
3.55200005	539.629517
3.55599999	539.457336
3.55999994	538.495789
3.56399989	538.174377
3.56799984	538.662537
3.57200003	538.144104
3.57599998	537.088257
3.57999992	536.009277
3.58399987	536.207581
3.58800006	535.568298
3.59200001	535.672302
3.59599996	535.596924
3.5999999	534.920349
3.60399985	534.393677
3.60800004	534.24176
3.61199999	534.649475
3.61599994	533.614197
3.61999989	532.421875
3.62399983	532.163147
3.62800002	531.427124
3.63199997	530.840332
3.63599992	530.444824
3.63999987	529.891418
3.64400005	528.788879
3.648	506.424316
3.65199995	528.553345
3.6559999	530.181091
3.65999985	530.218262
3.66400003	529.739624
3.66799998	528.55365
3.67199993	527.854248
3.67599988	527.130005
3.68000007	526.780945
3.68400002	508.265015
3.68799996	524.648499
3.69199991	527.1026
3.69599986	527.920471
3.70000005	527.059631
3.704	525.90979
3.70799994	526.270691
3.71199989	526.493042
3.71599984	525.806396
3.72000003	525.725342
3.72399998	525.865906
3.72799993	525.269653
3.73199987	525.305115
3.73600006	525.430908
3.74000001	525.543945
3.74399996	525.405884
3.74799991	526.100403
3.75199986	526.259033
3.75600004	526.983643
3.75999999	526.81897
3.76399994	527.659729
3.76799989	527.72229
3.77199984	528.4198
3.77600002	528.902283
3.77999997	528.96582
3.78399992	529.623718
3.78799987	530.44458
3.79200006	530.796631
3.796	531.940002
3.79999995	532.570923
3.8039999	533.177429
3.80799985	533.30127
3.81200004	534.19928
3.81599998	534.718872
3.81999993	535.824158
3.82399988	536.659241
3.82799983	537.293457
3.83200002	538.525635
3.83599997	539.028809
3.83999991	539.145386
3.84399986	540.21167
3.84800005	541.284424
3.852	541.809021
3.85599995	542.473816
3.8599999	542.790222
3.86399984	542.943359
3.86800003	544.875977
3.87199998	544.535278
3.87599993	545.216064
3.87999988	545.633057
3.88400006	547.749756
3.88800001	549.016296
3.89199996	548.521423
3.89599991	548.762634
3.89999986	547.748657
3.90400004	425.647125
3.90799999	388.585938
3.91199994	420.193207
3.91599989	444.528442
3.91999984	438.533905
3.92400002	394.791168
3.92799997	407.342834
3.93199992	408.248962
3.93599987	425.51947
3.94000006	435.639954
3.94400001	452.251099
3.94799995	452.186157
3.9519999	432.030243
3.95599985	393.282043
3.96000004	344.493042
3.96399999	314.24353
3.96799994	309.858978
3.97199988	306.290131
3.97599983	308.373871
3.98000002	313.146973
3.98399997	311.100708
3.98799992	316.245819
3.99199986	316.598846
3.99600005	316.208252
4	305.749664
4.00400019	300.834198
4.00800037	296.03125
4.01200008	294.578796
4.01600027	294.239014
4.01999998	294.248077
4.02400017	292.965393
4.02800035	290.208069
4.03200006	284.698181
4.03600025	277.698029
4.03999996	270.150482
4.04400015	262.267181
4.04800034	255.017014
4.05200005	248.376862
4.05600023	241.834763
4.06000042	235.406219
4.06400013	229.112045
4.06800032	222.745972
4.07200003	215.366486
4.07600021	208.289993
4.0800004	202.206436
4.08400011	195.673431
4.0880003	188.127472
4.09200001	181.14061
4.09600019	177.672607
4.10000038	176.038864
4.10400009	-9.68928242
4.10800028	-16.3791618
4.11199999	-16.9300556
4.11600018	-18.6222172
4.12000036	-17.7648048
4.12400007	-18.217207
4.12800026	-18.0554466
4.13199997	-18.6318359
4.13600016	-19.6808586
4.14000034	-19.5393581
4.14400005	-19.6934776
4.14800024	-19.8313694
4.15199995	-19.9571419
4.15600014	-20.0959492
4.16000032	-20.1983528
4.16400003	-20.2962837
4.16800022	-20.3944378
4.17200041	-20.465641
4.17600012	-20.5951786
4.18000031	-20.6875153
4.18400002	-20.7811928
4.1880002	-20.8755608
4.19200039	-20.969038
4.1960001	-21.0632744
4.20000029	-21.1584206
4.204	-21.252264
4.20800018	-21.345192
4.21200037	-21.4190521
4.21600008	-21.5302792
4.22000027	-21.5921135
4.22399998	-21.673584
4.22800016	-21.7500763
4.23200035	-21.8391838
4.23600006	-21.8879318
4.24000025	-21.9291077
4.24399996	-21.9482498
4.24800014	-22.0062771
4.25200033	-22.010603
4.25600004	-22.0341187
4.26000023	-22.0699291
4.26400042	-22.0670605
4.26800013	-22.04002
4.27200031	-22.0339489
4.27600002	-22.0199947
4.28000021	-21.9975166
4.2840004	-21.9667149
4.28800011	-21.9452953
4.29200029	-21.8876038
4.296	-21.8250198
4.30000019	-21.7579632
4.30400038	-21.6871853
4.30800009	-21.5964203
4.31200027	-21.5287037
4.31599998	-21.457016
4.32000017	-21.3803768
4.32400036	-21.2979984
4.32800007	-21.2100601
4.33200026	-21.1166077
4.33599997	-21.0184307
4.34000015	-20.9287052
4.34400034	-20.8017387
4.34800005	-20.693325
4.35200024	-20.5830212
4.35600042	-20.4710197
4.36000013	-20.3569202
4.36400032	-20.2423935
4.36800003	-20.1271038
4.37200022	-20.0103836
4.3760004	-19.8929234
4.38000011	-19.7750034
4.3840003	-19.6568451
4.38800001	-19.5386963
4.3920002	-19.4209175
4.39600039	-19.3035259
4.4000001	-19.1952915
4.40400028	-19.0669765
4.40799999	-18.95228
4.41200018	-18.8400574
4.41600037	-18.729948
4.42000008	-18.6221085
4.42400026	-18.516531
4.42799997	-18.4132462
4.43200016	-18.3121967
4.43600035	-18.2145538
4.44000006	-18.1198997
4.44400024	-18.0289211
4.44799995	-17.9462795
4.45200014	-17.8617344
4.45600033	-17.7768574
4.46000004	-17.7034245
4.46400023	-17.6407013
4.46800041	-17.5799007
4.47200012	-17.5252781
4.47600031	-17.4774303
4.48000002	-17.3904457
4.48400021	-17.3074608
4.48800039	-17.225378
