# Supplementary material for: Universal Walking Control Framework of Biped Robot Based on Dynamic Model and Quadratic Programming
Source: Hindawi journal article supplement (doi:10.1155/2020/2789039), 2020-10-31
Supplement: f1 [file 2789039.f1.zip › Force control/FT z right]

0.492000014	272.037415
0.496000022	273.312866
0.5	272.699371
0.504000008	270.92807
0.508000016	271.370911
0.512000024	272.703522
0.516000032	270.524811
0.519999981	271.995605
0.523999989	272.163422
0.527999997	269.627075
0.532000005	273.808594
0.536000013	272.620209
0.540000021	270.47226
0.54400003	272.666656
0.548000038	270.280823
0.551999986	272.29599
0.555999994	269.402466
0.560000002	272.055573
0.56400001	271.921265
0.568000019	269.789001
0.572000027	272.21701
0.576000035	270.496765
0.579999983	271.639984
0.583999991	270.785248
0.588	273.177124
0.592000008	270.658844
0.596000016	272.155121
0.600000024	271.598602
0.604000032	270.122833
0.60799998	273.126434
0.611999989	271.755493
0.615999997	270.294891
0.620000005	272.222229
0.624000013	271.732117
0.628000021	270.470551
0.632000029	272.684174
0.636000037	270.526093
0.639999986	271.9599
0.643999994	271.847717
0.648000002	270.153137
0.65200001	272.399323
0.656000018	271.275604
0.660000026	271.062866
0.664000034	271.343475
0.667999983	269.601929
0.671999991	272.308105
0.675999999	271.661469
0.680000007	269.880188
0.684000015	272.155121
0.688000023	271.348572
0.692000031	269.026825
0.69599998	272.770752
0.699999988	272.066376
0.703999996	271.707703
0.708000004	271.44809
0.712000012	269.857452
0.716000021	272.01593
0.720000029	271.446533
0.724000037	269.801178
0.727999985	270.7258
0.731999993	271.099426
0.736000001	273.357635
0.74000001	272.02774
0.744000018	271.408508
0.748000026	271.473816
0.752000034	270.904938
0.755999982	271.114868
0.75999999	271.435272
0.763999999	271.519104
0.768000007	269.541779
0.772000015	271.432739
0.776000023	272.583221
0.780000031	270.593964
0.783999979	271.783997
0.787999988	269.958527
0.791999996	272.257874
0.796000004	271.602081
0.800000012	271.332947
0.80400002	271.462006
0.808000028	266.551422
0.812000036	269.016754
0.815999985	272.902557
0.819999993	272.636383
0.824000001	272.50235
0.828000009	272.482117
0.832000017	271.000946
0.836000025	272.695801
0.840000033	270.169678
0.843999982	271.751251
0.84799999	269.717987
0.851999998	271.588226
0.856000006	271.050171
0.860000014	270.269409
0.864000022	272.151184
0.868000031	271.647278
0.871999979	271.312439
0.875999987	269.39032
0.879999995	271.447174
0.884000003	269.064819
0.888000011	273.231049
0.89200002	271.801483
0.896000028	270.874023
0.900000036	269.30835
0.903999984	262.521851
0.907999992	270.172943
0.912	261.798584
0.916000009	264.011566
0.920000017	263.423248
0.924000025	262.997803
0.928000033	262.463013
0.931999981	261.687256
0.93599999	260.98407
0.939999998	257.641052
0.944000006	256.106781
0.948000014	250.016785
0.952000022	249.694397
0.95600003	248.927917
0.959999979	246.107208
0.963999987	245.090561
0.967999995	244.988708
0.972000003	239.839096
0.976000011	239.014465
0.980000019	236.096054
0.984000027	235.760315
0.988000035	231.381805
0.991999984	231.043716
0.995999992	229.604767
1	227.068481
1.00399995	225.431854
1.0079999	222.600433
1.01199996	220.5159
1.01599991	218.464645
1.01999998	216.385452
1.02399993	214.614685
1.028	211.215591
1.03199995	207.788437
1.03599989	206.383774
1.03999996	204.281189
1.04399991	202.225006
1.04799998	200.077347
1.05199993	198.276978
1.05599999	196.367722
1.05999994	195.590652
1.06399989	194.667313
1.06799996	188.994888
1.07199991	185.811951
1.07599998	184.204071
1.07999992	179.726898
1.08399999	176.503296
1.08799994	174.504883
1.09200001	169.863831
1.09599996	165.964996
1.0999999	162.498993
1.10399997	-15.4465141
1.10799992	-17.9888687
1.11199999	-18.7464581
1.11599994	-19.756876
1.12	-19.8087444
1.12399995	-19.8238773
1.1279999	-19.8385181
1.13199997	-19.8553219
1.13599992	-19.880146
1.13999999	-19.9152946
1.14399993	-19.95965
1.148	-20.0194244
1.15199995	-20.0804348
1.1559999	-20.1432362
1.15999997	-20.213913
1.16399992	-20.2888794
1.16799998	-20.3647041
1.17199993	-20.4411583
1.176	-20.5178719
1.17999995	-20.5906239
1.1839999	-20.6703453
1.18799996	-20.7458591
1.19199991	-20.8203907
1.19599998	-20.8889999
1.19999993	-20.9612617
1.204	-21.0300732
1.20799994	-21.0965786
1.21199989	-21.1683483
1.21599996	-21.2378101
1.21999991	-21.3031158
1.22399998	-21.3616943
1.22799993	-21.4218597
1.23199999	-21.4796677
1.23599994	-21.5315247
1.23999989	-21.5750217
1.24399996	-21.6189957
1.24799991	-21.6589451
1.25199997	-21.6929913
1.25599992	-21.7191563
1.25999999	-21.7447834
1.26399994	-21.7653408
1.26800001	-21.7803421
1.27199996	-21.7863941
1.2759999	-21.7894974
1.27999997	-21.789566
1.28399992	-21.7895603
1.28799999	-21.7838745
1.29199994	-21.7722588
1.296	-21.7515869
1.29999995	-21.7275982
1.3039999	-21.7040596
1.30799997	-21.6707668
1.31199992	-21.637188
1.31599998	-21.5983906
1.31999993	-21.5507889
1.324	-21.5000896
1.32799995	-21.452158
1.3319999	-21.3964329
1.33599997	-21.3355141
1.33999991	-21.2702389
1.34399998	-21.2013931
1.34799993	-21.1288967
1.352	-21.0536366
1.35599995	-20.971962
1.3599999	-20.8896294
1.36399996	-20.8056831
1.36799991	-20.7201214
1.37199998	-20.6329956
1.37599993	-20.5441093
1.38	-20.4576397
1.38399994	-20.3692513
1.38799989	-20.2713432
1.39199996	-20.1732655
1.39599991	-20.077673
1.39999998	-19.9742088
1.40399992	-19.872076
1.40799999	-19.7740726
1.41199994	-19.6690464
1.41599989	-19.567318
1.41999996	-19.4665298
1.42399991	-19.3670502
1.42799997	-19.2726574
1.43199992	-19.1732769
1.43599999	-19.0787125
1.43999994	-18.986454
1.44400001	-18.8963108
1.44799995	-18.8089809
1.4519999	-18.7248611
1.45599997	-18.6474419
1.45999992	-18.5670662
1.46399999	-18.4975414
1.46799994	-18.4258118
1.472	-18.3654938
1.47599995	-18.3035278
1.4799999	-18.2511311
1.48399997	-18.2049637
1.48799992	-18.165947
1.49199998	-18.1342754
1.49599993	-18.1147366
1.5	-18.0963669
1.50399995	-18.0884857
1.5079999	-18.0736332
1.51199996	-18.0568085
1.51599991	-18.027977
1.51999998	-18.0004425
1.52399993	-17.9685249
1.528	-17.9325123
1.53199995	-17.8966141
1.53599989	-17.8498802
1.53999996	-17.8093548
1.54399991	-17.7607021
1.54799998	-17.7072601
1.55199993	-17.6567154
1.55599999	-17.6028099
1.55999994	-17.5469646
1.56399989	-17.4935627
1.56799996	-17.4312172
1.57199991	-17.3783512
1.57599998	-17.3158512
1.57999992	-17.2592659
1.58399999	-17.2016449
1.58799994	-17.1437435
1.59200001	-17.0864697
1.59599996	-17.0302067
1.5999999	-16.9754143
1.60399997	-16.9251232
1.60799992	-16.8713818
1.61199999	-16.8208752
1.61599994	-16.7731209
1.62	-16.727457
1.62399995	-16.6835823
1.6279999	-16.6421127
1.63199997	-16.601593
1.63599992	-16.56147
1.63999999	-16.5193233
1.64399993	-16.4906063
1.648	-16.4706402
1.65199995	-16.4530811
1.6559999	-16.4382515
1.65999997	-16.422636
1.66399992	-16.4204845
1.66799998	-16.410181
1.67199993	-16.4151669
1.676	-16.4137039
1.67999995	-16.4276657
1.6839999	-16.435091
1.68799996	-16.4542789
1.69199991	-16.4802437
1.69599998	-16.5008965
1.69999993	-16.5340824
1.704	-16.5742493
1.70799994	-16.6091194
1.71199989	-16.6564369
1.71599996	-16.7107582
1.71999991	-16.7644386
1.72399998	-16.8204861
1.72799993	-16.8910618
1.73199999	-16.9549809
1.73599994	-17.0295372
1.73999989	-17.1072922
1.74399996	-17.1939526
1.74799991	-17.2762604
1.75199997	-17.3693714
1.75599992	-17.4657345
1.75999999	-17.565794
1.76399994	-17.669754
1.76800001	-17.7775002
1.77199996	-17.8889675
1.7759999	-18.0034237
1.77999997	-18.1209278
1.78399992	-18.2408924
1.78799999	-18.3677101
1.79199994	-18.4883785
1.796	-18.6141243
1.79999995	-18.7450829
1.8039999	-18.8688908
1.80799997	-19.0010986
1.81199992	-19.1286163
1.81599998	-19.2575359
1.81999993	-19.3807926
1.824	-19.5109692
1.82799995	-19.6249409
1.8319999	-19.7522335
1.83599997	-19.8723717
1.83999991	-19.9937477
1.84399998	-20.1158237
1.84799993	-20.2322102
1.852	-20.3436069
1.85599995	-20.4456158
1.8599999	-20.5449715
1.86399996	-20.6368694
1.86799991	-20.714756
1.87199998	-20.7836952
1.87599993	-20.8394547
1.88	-20.91465
1.88399994	-20.9676991
1.88799989	-21.0059052
1.89199996	-21.0315628
1.89599991	-21.0452461
1.89999998	-21.0435314
1.90399992	-12.3084087
1.90799999	-10.212059
1.91199994	4.63265324
1.91599989	199.582947
1.91999996	-103.494736
1.92399991	306.751953
1.92799997	-112.845222
1.93199992	447.412415
1.93599999	319.655548
1.93999994	224.994537
1.94400001	235.616669
1.94799995	184.851868
1.9519999	178.753891
1.95599997	137.285324
1.95999992	138.384384
1.96399999	148.895767
1.96799994	179.103622
1.972	177.820084
1.97599995	159.456604
1.9799999	148.000336
1.98399997	149.479828
1.98799992	164.235184
1.99199998	175.272049
1.99599993	184.982666
2	202.07959
2.00399995	216.089294
2.0079999	239.363647
2.01199985	285.221252
2.01600003	344.213531
2.01999998	340.765411
2.02399993	320.839661
2.02799988	308.718109
2.03200006	314.134705
2.03600001	293.49231
2.03999996	275.102539
2.04399991	291.294037
2.04799986	285.737457
2.05200005	289.062378
2.05599999	295.692078
2.05999994	298.26413
2.06399989	300.047333
2.06799984	302.398254
2.07200003	305.805573
2.07599998	312.555603
2.07999992	313.797791
2.08399987	319.871002
2.08800006	325.863617
2.09200001	331.508636
2.09599996	337.732605
2.0999999	343.777588
2.10399985	557.371277
2.10800004	577.592651
2.11199999	583.149414
2.11599994	586.897705
2.11999989	586.362915
2.12399983	578.1604
2.12800002	575.162964
2.13199997	569.683655
2.13599992	564.877197
2.13999987	559.766907
2.14400005	557.64093
2.148	555.325623
2.15199995	555.061035
2.1559999	553.122375
2.15999985	551.484131
2.16400003	550.752258
2.16799998	549.755188
2.17199993	548.930725
2.17599988	548.40509
2.18000007	547.828064
2.18400002	546.981262
2.18799996	546.347107
2.19199991	545.057739
2.19599986	544.325378
2.20000005	543.055908
2.204	542.40564
2.20799994	541.935669
2.21199989	541.329285
2.21599984	540.666992
2.22000003	540.051758
2.22399998	540.014771
2.22799993	539.91925
2.23199987	539.321899
2.23600006	538.75647
2.24000001	538.425171
2.24399996	538.600952
2.24799991	538.668701
2.25199986	537.980103
2.25600004	538.624573
2.25999999	538.779724
2.26399994	538.566895
2.26799989	538.56842
2.27199984	538.810425
2.27600002	538.609436
2.27999997	538.607727
2.28399992	538.878601
2.28799987	538.995667
2.29200006	539.269348
2.296	539.178711
2.29999995	539.490662
2.3039999	539.567078
2.30799985	539.674133
2.31200004	539.627197
2.31599998	539.710815
2.31999993	539.789001
2.32399988	539.888672
2.32799983	539.980713
2.33200002	540.172668
2.33599997	540.239502
2.33999991	540.315857
2.34399986	540.847473
2.34800005	540.756653
2.352	541.03064
2.35599995	541.275146
2.3599999	541.537109
2.36399984	541.80603
2.36800003	542.210388
2.37199998	542.302917
2.37599993	542.506531
2.37999988	542.943604
2.38400006	543.077759
2.38800001	543.392334
2.39199996	543.669006
2.39599991	544.021179
2.39999986	544.128174
2.40400004	544.510559
2.40799999	545.124146
2.41199994	544.832153
2.41599989	545.805237
2.41999984	546.523987
2.42400002	546.53363
2.42799997	546.682312
2.43199992	546.939636
2.43599987	547.253357
2.44000006	547.793335
2.44400001	548.03833
2.44799995	548.207397
2.4519999	547.926514
2.45599985	549.024597
2.46000004	549.690491
2.46399999	550.212585
2.46799994	550.697266
2.47199988	551.032776
2.47599983	550.910645
2.48000002	551.106079
2.48399997	551.34314
2.48799992	551.30603
2.49199986	551.817688
2.49600005	552.502747
2.5	552.675903
2.50399995	552.698364
2.5079999	552.915405
2.51199985	553.145813
2.51600003	553.228577
2.51999998	553.456604
2.52399993	553.087158
2.52799988	553.325134
2.53200006	553.235168
2.53600001	553.266968
2.53999996	553.214417
2.54399991	553.062561
2.54799986	552.851685
2.55200005	552.690247
2.55599999	552.129944
2.55999994	551.415955
2.56399989	551.435974
2.56799984	551.319092
2.57200003	550.940247
2.57599998	550.512939
2.57999992	549.80365
2.58399987	549.602966
2.58800006	548.874084
2.59200001	548.547302
2.59599996	547.576416
2.5999999	546.887207
2.60399985	546.326111
2.60800004	545.763062
2.61199999	544.843994
2.61599994	544.126892
2.61999989	543.294434
2.62399983	542.849121
2.62800002	542.121643
2.63199997	541.258789
2.63599992	540.739136
2.63999987	539.747192
2.64400005	539.095337
2.648	538.547363
2.65199995	537.267944
2.6559999	536.656372
2.65999985	536.050049
2.66400003	536.127991
2.66799998	534.427856
2.67199993	533.787537
2.67599988	533.352722
2.68000007	532.484558
2.68400002	531.77417
2.68799996	531.134399
2.69199991	530.518127
2.69599986	529.833374
2.70000005	529.259155
2.704	528.903015
2.70799994	527.958984
2.71199989	527.809875
2.71599984	526.916077
2.72000003	526.894287
2.72399998	526.326538
2.72799993	526.16095
2.73199987	525.623108
2.73600006	525.078918
2.74000001	525.049133
2.74399996	524.926331
2.74799991	524.774719
2.75199986	524.647644
2.75600004	523.965698
2.75999999	524.299805
2.76399994	524.325256
2.76799989	524.764587
2.77199984	524.651428
2.77600002	524.867004
2.77999997	524.961365
2.78399992	525.457764
2.78799987	525.244141
2.79200006	525.678223
2.796	525.929688
2.79999995	526.538635
2.8039999	526.733704
2.80799985	527.072876
2.81200004	527.40918
2.81599998	528.030457
2.81999993	528.284851
2.82399988	528.671997
2.82799983	529.21228
2.83200002	529.994873
2.83599997	530.374268
2.83999991	531.219482
2.84399986	531.367798
2.84800005	531.97345
2.852	532.794189
2.85599995	533.249756
2.8599999	533.779297
2.86399984	534.240234
2.86800003	534.896729
2.87199998	535.769348
2.87599993	536.168396
2.87999988	536.661682
2.88400006	537.170349
2.88800001	537.626282
2.89199996	538.128113
2.89599991	538.543945
2.89999986	539.002075
2.90400004	358.346649
2.90799999	396.528625
2.91199994	359.480774
2.91599989	373.034576
2.91999984	377.078491
2.92400002	390.224731
2.92799997	389.690338
2.93199992	399.411377
2.93599987	414.330994
2.94000006	410.276367
2.94400001	401.258026
2.94799995	380.299774
2.9519999	387.911377
2.95599985	399.308716
2.96000004	372.590179
2.96399999	361.481415
2.96799994	346.497223
2.97199988	335.729218
2.97599983	325.602478
2.98000002	312.256287
2.98399997	305.901794
2.98799992	299.119568
2.99199986	293.936188
2.99600005	290.265015
3	287.571808
3.00399995	285.898224
3.0079999	285.454834
3.01199985	283.635406
3.01600003	280.769897
3.01999998	276.694702
3.02399993	272.683533
3.02799988	289.409973
3.03200006	306.331573
3.03600001	317.235626
3.03999996	316.546753
3.04399991	292.52533
3.04799986	270.695312
3.05200005	237.313919
3.05599999	217.454056
3.05999994	204.90181
3.06399989	201.651459
3.06799984	204.013962
3.07200003	207.822647
3.07599998	209.428497
3.07999992	207.961761
3.08399987	202.979202
3.08800006	195.65451
3.09200001	188.114975
3.09599996	179.837631
3.0999999	173.03154
3.10399985	-5.55369616
3.10800004	-11.1314831
3.11199999	-11.0475092
3.11599994	-12.6295347
3.11999989	-11.6500731
3.12399983	-12.2674618
3.12800002	-12.1282959
3.13199997	-13.1122999
3.13599992	-13.3235483
3.13999987	-14.1762428
3.14400005	-14.6104546
3.148	-15.4990664
3.15199995	-15.9028206
3.1559999	-16.6651077
3.15999985	-16.9315491
3.16400003	-17.437933
3.16799998	-17.8983212
3.17199993	-18.4596462
3.17599988	-18.6045532
3.18000007	-19.1244392
3.18400002	-19.8726807
3.18799996	-20.1262436
3.19199991	-20.258688
3.19599986	-20.3799152
3.20000005	-20.4918575
3.204	-20.5966969
3.20799994	-20.6972828
3.21199989	-20.7924538
3.21599984	-20.8840466
3.22000003	-20.9719791
3.22399998	-21.059166
3.22799993	-21.1440601
3.23199987	-21.2237167
3.23600006	-21.2972374
3.24000001	-21.368
3.24399996	-21.4339104
3.24799991	-21.4941769
3.25199986	-21.5477238
3.25600004	-21.5951443
3.25999999	-21.6346149
3.26399994	-21.6664066
3.26799989	-21.6892414
3.27199984	-21.705843
3.27600002	-21.7155724
3.27999997	-21.7182026
3.28399992	-21.7134953
3.28799987	-21.7018318
3.29200006	-21.6832523
3.296	-21.6575279
3.29999995	-21.6258392
3.3039999	-21.5880318
3.30799985	-21.5425682
3.31200004	-21.4926643
3.31599998	-21.4364605
3.31999993	-21.3731403
3.32399988	-21.3065186
3.32799983	-21.2359734
3.33200002	-21.1599312
3.33599997	-21.0760593
3.33999991	-20.9871559
3.34399986	-21.032465
3.34800005	-21.1400414
3.352	-20.0281544
3.35599995	-20.0901451
3.3599999	-20.1258678
3.36399984	-20.138258
3.36800003	-20.1309338
3.37199998	-20.1012287
3.37599993	-20.0480175
3.37999988	-19.974329
3.38400006	-19.8856583
3.38800001	-19.7842293
3.39199996	-19.673254
3.39599991	-19.5554848
3.39999986	-19.43297
3.40400004	-19.3068905
3.40799999	-19.1775951
3.41199994	-19.0498409
3.41599989	-18.9243374
3.41999984	-18.8004932
3.42400002	-18.678278
3.42799997	-18.5590878
3.43199992	-18.4440422
3.43599987	-18.3323212
3.44000006	-18.2242699
3.44400001	-18.1201801
3.44799995	-18.0217915
3.4519999	-17.9261703
3.45599985	-17.837141
3.46000004	-17.7533379
3.46399999	-17.6725044
3.46799994	-17.5981426
3.47199988	-17.5302315
3.47599983	-17.4664154
3.48000002	-17.4092865
3.48399997	-17.3636112
3.48799992	-17.322176
3.49199986	-17.292244
3.49600005	-17.2732658
3.5	-17.2547569
3.50399995	-17.2407703
3.5079999	-17.2290363
3.51199985	-17.2194061
3.51600003	-17.2103958
3.51999998	-17.1952877
3.52399993	-17.1775436
3.52799988	-17.1552143
3.53200006	-17.131546
3.53600001	-17.1048203
3.53999996	-17.0758362
3.54399991	-17.0458603
3.54799986	-17.016407
3.55200005	-16.9832916
3.55599999	-16.9545879
3.55999994	-16.9242077
3.56399989	-16.8933334
3.56799984	-16.863884
3.57200003	-16.8326283
3.57599998	-16.8041821
3.57999992	-16.7760563
3.58399987	-16.7487602
3.58800006	-16.722765
3.59200001	-16.7009239
3.59599996	-16.6814957
3.5999999	-16.6620426
3.60399985	-16.6501369
3.60800004	-16.6381359
3.61199999	-16.6339741
3.61599994	-16.6314659
3.61999989	-16.6340771
3.62399983	-16.6367493
3.62800002	-16.6422672
3.63199997	-16.650095
3.63599992	-16.6609707
3.63999987	-16.675827
3.64400005	-16.6955662
3.648	-16.5905876
3.65199995	-16.6848392
3.6559999	-16.7283039
3.65999985	-16.7818375
3.66400003	-16.8388195
3.66799998	-16.898838
3.67199993	-16.95924
3.67599988	-17.022274
3.68000007	-17.0872135
3.68400002	-17.0316639
3.68799996	-17.1784592
3.69199991	-17.2609406
3.69599986	-17.354002
3.70000005	-17.4497871
3.704	-17.5518913
3.70799994	-17.6481514
3.71199989	-17.7482491
3.71599984	-17.8534603
3.72000003	-17.9582729
3.72399998	-18.0657177
3.72799993	-18.1773129
3.73199987	-18.2913036
3.73600006	-18.4089928
3.74000001	-18.5297012
3.74399996	-18.6544685
3.74799991	-18.7795448
3.75199986	-18.9070435
3.75600004	-19.0350933
3.75999999	-19.1666965
3.76399994	-19.297718
3.76799989	-19.4299984
3.77199984	-19.5614853
3.77600002	-19.6932945
3.77999997	-19.8280811
3.78399992	-19.9602833
3.78799987	-20.0926247
3.79200006	-20.2242851
3.796	-20.3507862
3.79999995	-20.4748631
3.8039999	-20.5979404
3.80799985	-20.7227573
3.81200004	-20.842329
3.81599998	-20.9569035
3.81999993	-21.0689564
3.82399988	-21.1744576
3.82799983	-21.2755127
3.83200002	-21.3667755
3.83599997	-21.4534683
3.83999991	-21.5387688
3.84399986	-21.6148205
3.84800005	-21.682972
3.852	-21.7443829
3.85599995	-21.7981453
3.8599999	-21.8481464
3.86399984	-21.8888264
3.86800003	-21.9152393
3.87199998	-21.9360752
3.87599993	-21.9462776
3.87999988	8.03770447
3.88400006	-16.2003555
3.88800001	-7.86644125
3.89199996	-23.2817268
3.89599991	-13.1198435
3.89999986	-16.6385288
3.90400004	10.5177927
3.90799999	98.6141281
3.91199994	87.7816238
3.91599989	57.0301895
3.91999984	46.4289017
3.92400002	89.5828018
3.92799997	113.217041
3.93199992	123.770401
3.93599987	160.807098
3.94000006	122.316566
3.94400001	89.7767105
3.94799995	84.3636856
3.9519999	95.1285248
3.95599985	118.293411
3.96000004	151.701691
3.96399999	193.88855
3.96799994	213.768494
3.97199988	213.273041
3.97599983	210.390167
3.98000002	208.777573
3.98399997	209.966202
3.98799992	214.951706
3.99199986	224.779037
3.99600005	236.382568
4	255.90715
4.00400019	265.506927
4.00800037	289.263031
4.01200008	303.113708
4.01600027	303.544617
4.01999998	296.554413
4.02400017	293.070343
4.02800035	286.758942
4.03200006	284.895111
4.03600025	285.542755
4.03999996	286.912567
4.04400015	289.52475
4.04800034	292.799683
4.05200005	296.663849
4.05600023	300.687866
4.06000042	305.289917
4.06400013	309.515961
4.06800032	314.050171
4.07200003	318.961151
4.07600021	323.89859
4.0800004	330.258698
4.08400011	336.736755
4.0880003	342.880371
4.09200001	348.32901
4.09600019	352.701172
4.10000038	357.263245
4.10400009	534.879578
4.10800028	552.307922
4.11199999	554.044189
4.11600018	556.117493
4.12000036	553.907593
4.12400007	551.534485
4.12800026	549.691711
4.13199997	549.10907
4.13600016	548.651672
4.14000034	547.872498
4.14400005	547.619263
4.14800024	547.79425
4.15199995	547.850952
4.15600014	547.962341
4.16000032	547.759949
4.16400003	547.334045
4.16800022	546.788757
4.17200041	546.522339
4.17600012	546.513062
4.18000031	546.360107
4.18400002	545.999634
4.1880002	545.762939
4.19200039	545.707092
4.1960001	545.538025
4.20000029	545.497253
4.204	545.432556
4.20800018	545.322693
4.21200037	545.134949
4.21600008	545.476013
4.22000027	545.268372
4.22399998	545.224487
4.22800016	545.28186
4.23200035	545.547913
4.23600006	545.53833
4.24000025	545.582275
4.24399996	544.994385
4.24800014	545.164734
4.25200033	544.83905
4.25600004	544.936462
4.26000023	545.013245
4.26400042	544.958435
4.26800013	544.352783
4.27200031	544.196289
4.27600002	544.349365
4.28000021	544.259094
4.2840004	544.178711
4.28800011	544.605103
4.29200029	544.145264
4.296	543.771423
4.30000019	543.468262
4.30400038	543.183289
4.30800009	542.727356
4.31200027	542.501709
4.31599998	542.485718
4.32000017	542.393982
4.32400036	542.328857
4.32800007	542.151672
4.33200026	542.03418
4.33599997	541.851624
4.34000015	541.943054
4.34400034	541.442688
4.34800005	541.216064
4.35200024	541.049194
4.35600042	540.985229
4.36000013	540.926819
4.36400032	540.76062
4.36800003	540.57135
4.37200022	540.533325
4.3760004	540.5271
4.38000011	540.461975
4.3840003	540.469482
4.38800001	540.443665
4.3920002	540.457397
4.39600039	540.486511
4.4000001	540.714966
4.40400028	540.458862
4.40799999	540.510071
4.41200018	540.621033
4.41600037	540.762573
4.42000008	540.919434
4.42400026	541.061584
4.42799997	541.190735
4.43200016	541.304321
4.43600035	541.549927
4.44000006	541.684387
4.44400024	541.847717
4.44799995	542.188171
4.45200014	542.312561
4.45600033	542.370361
4.46000004	542.533142
4.46400023	542.978577
4.46800041	543.073608
4.47200012	543.208679
4.47600031	543.415161
4.48000002	543.545288
4.48400021	543.634644
4.48800039	543.658325
