# Supplementary material for: Universal Walking Control Framework of Biped Robot Based on Dynamic Model and Quadratic Programming
Source: Hindawi journal article supplement (doi:10.1155/2020/2789039), 2020-10-31
Supplement: f1 [file 2789039.f1.zip › Force control/Xzmp]

1.1839999	-0.00190127036
1.18799996	-0.0019345131
1.19199991	-0.0018704253
1.19599998	-0.00119467301
1.19999993	-0.000637910212
1.204	0.0014942683
1.20799994	0.0028031515
1.21199989	0.00389607041
1.21599996	0.0052344189
1.21999991	0.00541622145
1.22399998	0.00626445794
1.22799993	0.00722908368
1.23199999	0.00779078668
1.23599994	0.00961211696
1.23999989	0.00916389748
1.24399996	0.010503469
1.24799991	0.010100022
1.25199997	0.0102469185
1.25599992	0.0102700219
1.25999999	0.0114620179
1.26399994	0.0119834766
1.26800001	0.0123048732
1.27199996	0.012632763
1.2759999	0.0128848059
1.27999997	0.013582347
1.28399992	0.013226198
1.28799999	0.0135657275
1.29199994	0.0137898978
1.296	0.0154546108
1.29999995	0.0153206987
1.3039999	0.0153275859
1.30799997	0.0165783223
1.31199992	0.017206233
1.31599998	0.0179418139
1.31999993	0.0173689537
1.324	0.0172148291
1.32799995	0.0187060442
1.3319999	0.0184815191
1.33599997	0.0187050346
1.33999991	0.019037921
1.34399998	0.0190765932
1.34799993	0.0204796977
1.352	0.0200977344
1.35599995	0.0201407243
1.3599999	0.0199712384
1.36399996	0.0209450237
1.36799991	0.0211893823
1.37199998	0.0215149
1.37599993	0.0206255
1.38	0.0204330459
1.38399994	0.0200930834
1.38799989	0.0212336592
1.39199996	0.020575868
1.39599991	0.0198775176
1.39999998	0.0196228642
1.40399992	0.019594403
1.40799999	0.0196811222
1.41199994	0.0197950527
1.41599989	0.0195676014
1.41999996	0.0208716784
1.42399991	0.0198388025
1.42799997	0.0208403077
1.43199992	0.0200050827
1.43599999	0.0197029598
1.43999994	0.0194901638
1.44400001	0.0188573655
1.44799995	0.0196807291
1.4519999	0.0184906721
1.45599997	0.0178230722
1.45999992	0.0175958816
1.46399999	0.0179656837
1.46799994	0.0176086035
1.472	0.0174494721
1.47599995	0.0161216557
1.4799999	0.0156419836
1.48399997	0.015418076
1.48799992	0.015246368
1.49199998	0.015048231
1.49599993	0.0144318929
1.5	0.0153591437
1.50399995	0.0143378675
1.5079999	0.013541271
1.51199996	0.0141321337
1.51599991	0.0143868672
1.51999998	0.012867203
1.52399993	0.0136573724
1.528	0.0122707328
1.53199995	0.0130773084
1.53599989	0.0120140743
1.53999996	0.011494956
1.54399991	0.0112500805
1.54799998	0.012285959
1.55199993	0.0106896535
1.55599999	0.00976945739
1.55999994	0.00967765506
1.56399989	0.00942690205
1.56799996	0.00912674423
1.57199991	0.00813801493
1.57599998	0.00799483526
1.57999992	0.00764294388
1.58399999	0.00725278491
1.58799994	0.00691492623
1.59200001	0.00596489105
1.59599996	0.00543548167
1.5999999	0.0060469443
1.60399997	0.005292702
1.60799992	0.00463101035
1.61199999	0.0041452758
1.61599994	0.00381105021
1.62	0.00399400573
1.62399995	0.00273249345
1.6279999	0.00364197418
1.63199997	0.00307450653
1.63599992	0.0023951598
1.63999999	0.001672521
1.64399993	0.00158642151
1.648	0.00116244017
1.65199995	-0.000522510731
1.6559999	1.9572999e-05
1.65999997	0.000314369187
1.66399992	-0.00221091649
1.66799998	-0.00158887508
1.67199993	-0.00174133654
1.676	-0.00350456079
1.67999995	-0.00245353114
1.6839999	-0.00280871172
1.68799996	-0.00269667688
1.69199991	-0.00514496351
1.69599998	-0.00428547105
1.69999993	-0.00421092054
1.704	-0.00439944305
1.70799994	-0.00420790538
1.71199989	-0.00604673009
1.71599996	-0.00544912089
1.71999991	-0.0055749896
1.72399998	-0.00542063825
1.72799993	-0.00733867195
1.73199999	-0.00632156385
1.73599994	-0.00797502976
1.73999989	-0.00735448534
1.74399996	-0.0074748951
1.74799991	-0.00728788227
1.75199997	-0.00913793035
1.75599992	-0.00798161607
1.75999999	-0.00948182959
1.76399994	-0.00866720732
1.76800001	-0.00858991593
1.77199996	-0.00872417167
1.7759999	-0.00891386438
1.77999997	-0.00907873455
1.78399992	-0.00920495577
1.78799999	-0.00930241589
1.79199994	-0.00937384274
1.796	-0.00942711532
1.79999995	-0.00948400423
1.8039999	-0.00942192134
1.80799997	-0.00932391174
1.81199992	-0.00869877636
1.81599998	-0.00961724762
1.81999993	-0.00999463443
1.824	-0.00845504459
1.82799995	-0.00776146026
1.8319999	-0.00669780839
1.83599997	-0.00769768469
1.83999991	-0.00607879506
1.84399998	-0.00535739539
1.84799993	-0.00510538556
1.852	-0.00468618097
1.85599995	-0.00596629083
1.8599999	-0.00636991067
1.86399996	-0.00570411421
1.86799991	-0.00592896389
1.87199998	-0.00513515621
1.87599993	-0.00477268267
1.88	-0.00458454061
1.88399994	-0.00357633224
1.88799989	-0.0027050639
1.89199996	-0.00205519423
1.89599991	-0.00169387471
1.89999998	-0.00208959635
1.90399992	-0.0447419956
1.90799999	-0.0791025832
1.91199994	-0.0792371929
1.91599989	0.0307525136
1.91999996	0.0158750825
1.92399991	-0.00856217556
1.92799997	0.0703749955
1.93199992	0.0641386956
1.93599999	0.0206394326
1.93999994	0.0128241805
1.94400001	0.00938322209
1.94799995	-0.00252405484
1.9519999	-0.013104355
1.95599997	-0.012082994
1.95999992	-0.00761020603
1.96399999	-0.0024126952
1.96799994	0.005846438
1.972	0.0202426277
1.97599995	0.0363073163
1.9799999	0.0444915406
1.98399997	0.0481198132
1.98799992	0.0501834378
1.99199998	0.0555283688
1.99599993	0.06018731
2	0.0678508282
2.00399995	0.0771933794
2.0079999	0.0881476924
2.01199985	0.111596227
2.01600003	0.144009084
2.01999998	0.175572634
2.02399993	0.202112168
2.02799988	0.219315693
2.03200006	0.227385074
2.03600001	0.231668323
2.03999996	0.219690561
2.04399991	0.212455168
2.04799986	0.201801956
2.05200005	0.170475215
2.05599999	0.155810967
2.05999994	0.147223994
2.06399989	0.143561095
2.06799984	0.139681622
2.07200003	0.133329198
2.07599998	0.125875622
2.07999992	0.116282091
2.08399987	0.111783132
2.08800006	0.105541982
2.09200001	0.10208419
2.09599996	0.10182485
2.0999999	0.102815539
2.10399985	0.112528622
2.10800004	0.116860919
2.11199999	0.117025509
2.11599994	0.128966972
2.11999989	0.137773141
2.12399983	0.145041332
2.12800002	0.150556818
2.13199997	0.154710338
2.13599992	0.159426764
2.13999987	0.164413959
2.14400005	0.169357002
2.148	0.175593585
2.15199995	0.182059869
2.1559999	0.189016953
2.15999985	0.196038678
2.16400003	0.202964067
2.16799998	0.209552228
2.17199993	0.215674996
2.17599988	0.22111547
2.18000007	0.225807518
2.18400002	0.229694903
2.18799996	0.23278743
2.19199991	0.235081434
2.19599986	0.236671463
2.20000005	0.237577364
2.204	0.237743467
2.20799994	0.237314492
2.21199989	0.23647052
2.21599984	0.235132605
2.22000003	0.23365353
2.22399998	0.231901854
2.22799993	0.230106518
2.23199987	0.228374928
2.23600006	0.226551473
2.24000001	0.224916592
2.24399996	0.22341229
2.24799991	0.222176105
2.25199986	0.221058533
2.25600004	0.220223323
2.25999999	0.219543695
2.26399994	0.219052538
2.26799989	0.218710765
2.27199984	0.218450546
2.27600002	0.218446821
2.27999997	0.218483537
2.28399992	0.218805626
2.28799987	0.219175577
2.29200006	0.219668761
2.296	0.220295161
2.29999995	0.2210581
2.3039999	0.221860692
2.30799985	0.222763598
2.31200004	0.223616868
2.31599998	0.22446771
2.31999993	0.225400984
2.32399988	0.226348549
2.32799983	0.227372706
2.33200002	0.228420272
2.33599997	0.229339451
2.33999991	0.230297595
2.34399986	0.231073007
2.34800005	0.231928945
2.352	0.232588172
2.35599995	0.233367339
2.3599999	0.233972505
2.36399984	0.234635562
2.36800003	0.235132635
2.37199998	0.235494882
2.37599993	0.235782489
2.37999988	0.236057326
2.38400006	0.236231074
2.38800001	0.23639147
2.39199996	0.236492619
2.39599991	0.236598641
2.39999986	0.236459002
2.40400004	0.236381397
2.40799999	0.23616451
2.41199994	0.236098275
2.41599989	0.235843852
2.41999984	0.236403301
2.42400002	0.236209974
2.42799997	0.235908896
2.43199992	0.235617086
2.43599987	0.23507835
2.44000006	0.234513983
2.44400001	0.233622596
2.44799995	0.232128158
2.4519999	0.233006284
2.45599985	0.232101828
2.46000004	0.23180595
2.46399999	0.231013134
2.46799994	0.230246007
2.47199988	0.229323551
2.47599983	0.22877942
2.48000002	0.227878824
2.48399997	0.227115601
2.48799992	0.226148114
2.49199986	0.225279436
2.49600005	0.224249497
2.5	0.223431021
2.50399995	0.222649679
2.5079999	0.221847892
2.51199985	0.221059114
2.51600003	0.2203013
2.51999998	0.21957691
2.52399993	0.218836322
2.52799988	0.218103379
2.53200006	0.217464179
2.53600001	0.216747865
2.53999996	0.216032118
2.54399991	0.215185553
2.54799986	0.214301199
2.55200005	0.213460311
2.55599999	0.21256493
2.55999994	0.211726308
2.56399989	0.21073103
2.56799984	0.209703222
2.57200003	0.208777338
2.57599998	0.207738772
2.57999992	0.206612557
2.58399987	0.205577865
2.58800006	0.204340383
2.59200001	0.203233808
2.59599996	0.202176243
2.5999999	0.201026544
2.60399985	0.200028569
2.60800004	0.198932528
2.61199999	0.197861776
2.61599994	0.196812779
2.61999989	0.195731297
2.62399983	0.194745839
2.62800002	0.193817124
2.63199997	0.192869335
2.63599992	0.191932485
2.63999987	0.191120073
2.64400005	0.190239444
2.648	0.189379632
2.65199995	0.188542292
2.6559999	0.18773298
2.65999985	0.186761871
2.66400003	0.185757056
2.66799998	0.184851483
2.67199993	0.18396914
2.67599988	0.183145136
2.68000007	0.182255924
2.68400002	0.181674734
2.68799996	0.180992737
2.69199991	0.180447862
2.69599986	0.179686338
2.70000005	0.179029062
2.704	0.178293869
2.70799994	0.177503258
2.71199989	0.177052766
2.71599984	0.176270857
2.72000003	0.175787941
2.72399998	0.175286084
2.72799993	0.175001055
2.73199987	0.174531087
2.73600006	0.174251497
2.74000001	0.173961267
2.74399996	0.17373395
2.74799991	0.173563302
2.75199986	0.173431963
2.75600004	0.173330009
2.75999999	0.173310727
2.76399994	0.174011514
2.76799989	0.173220977
2.77199984	0.173231244
2.77600002	0.173192382
2.77999997	0.173314348
2.78399992	0.173525617
2.78799987	0.17377995
2.79200006	0.174003273
2.796	0.174288645
2.79999995	0.174575686
2.8039999	0.174928918
2.80799985	0.175250664
2.81200004	0.175588697
2.81599998	0.175678626
2.81999993	0.17574665
2.82399988	0.176180601
2.82799983	0.176652834
2.83200002	0.177219763
2.83599997	0.177736253
2.83999991	0.178055778
2.84399986	0.177976593
2.84800005	0.178573087
2.852	0.178984866
2.85599995	0.179535061
2.8599999	0.180038184
2.86399984	0.180776283
2.86800003	0.181531459
2.87199998	0.182088464
2.87599993	0.182489634
2.87999988	0.182946146
2.88400006	0.183404535
2.88800001	0.184069052
2.89199996	0.184721917
2.89599991	0.185527593
2.89999986	0.186236531
2.90400004	0.116142124
2.90799999	0.167036414
2.91199994	0.187863752
2.91599989	0.17453976
2.91999984	0.179030836
2.92400002	0.165458441
2.92799997	0.16637978
2.93199992	0.170103237
2.93599987	0.16351445
2.94000006	0.167486623
2.94400001	0.170105785
2.94799995	0.177875444
2.9519999	0.192875758
2.95599985	0.220817298
2.96000004	0.244508252
2.96399999	0.252523929
2.96799994	0.256759346
2.97199988	0.264392048
2.97599983	0.264210582
2.98000002	0.267583519
2.98399997	0.271433324
2.98799992	0.275211245
2.99199986	0.278907388
2.99600005	0.282185614
3	0.286042482
3.00399995	0.290092409
3.0079999	0.295501173
3.01199985	0.303755194
3.01600003	0.316263974
3.01999998	0.338065654
3.02399993	0.355428129
3.02799988	0.391849637
3.03200006	0.410347492
3.03600001	0.421072632
3.03999996	0.422056645
3.04399991	0.415219873
3.04799986	0.404836059
3.05200005	0.388631433
3.05599999	0.365940392
3.05999994	0.342654616
3.06399989	0.328855872
3.06799984	0.320345551
3.07200003	0.315212011
3.07599998	0.312203526
3.07999992	0.308743119
3.08399987	0.30496338
3.08800006	0.301292181
3.09200001	0.298199683
3.09599996	0.297263294
3.0999999	0.298464119
3.10399985	0.327645361
3.10800004	0.332921296
3.11199999	0.332890302
3.11599994	0.332782596
3.11999989	0.332419187
3.12399983	0.331611633
3.12800002	0.330883592
3.13199997	0.330546379
3.13599992	0.330568552
3.13999987	0.330593675
3.14400005	0.33092615
3.148	0.330813468
3.15199995	0.337835729
3.1559999	0.359159201
3.15999985	0.381900281
3.16400003	0.401421785
3.16799998	0.418032974
3.17199993	0.431172729
3.17599988	0.439590037
3.18000007	0.444558978
3.18400002	0.446489483
3.18799996	0.445816636
3.19199991	0.443271369
3.19599986	0.439819366
3.20000005	0.435922801
3.204	0.431974262
3.20799994	0.428394467
3.21199989	0.425331235
3.21599984	0.422916919
3.22000003	0.421088278
3.22399998	0.419759512
3.22799993	0.418795913
3.23199987	0.418010771
3.23600006	0.417176098
3.24000001	0.416576743
3.24399996	0.415442497
3.24799991	0.413910776
3.25199986	0.412289321
3.25600004	0.410611451
3.25999999	0.408862174
3.26399994	0.407171279
3.26799989	0.405590981
3.27199984	0.47487089
3.27600002	0.356845707
3.27999997	0.457196325
3.28399992	0.443461925
3.28799987	0.421094567
3.29200006	0.403634906
3.296	0.393364221
3.29999995	0.389009565
3.3039999	0.388685256
3.30799985	0.390369475
3.31200004	0.393465608
3.31599998	0.397408575
3.31999993	0.401507646
3.32399988	0.405723691
3.32799983	0.48065117
3.33200002	0.352182895
3.33599997	0.465709984
3.33999991	0.454551309
3.34399986	0.43697238
3.34800005	0.42743063
3.352	0.423069745
3.35599995	0.419000834
3.3599999	0.416708738
3.36399984	0.415930837
3.36800003	0.416432261
3.37199998	0.417542785
3.37599993	0.419388205
3.37999988	0.421295315
3.38400006	0.423445433
3.38800001	0.425555825
3.39199996	0.427455783
3.39599991	0.42917639
3.39999986	0.430848897
3.40400004	0.432022929
3.40799999	0.432922632
3.41199994	0.433482021
3.41599989	0.433739305
3.41999984	0.433813691
3.42400002	0.433756053
3.42799997	0.43279779
3.43199992	0.433467925
3.43599987	0.433110267
3.44000006	0.430802524
3.44400001	0.431491911
3.44799995	0.430340707
3.4519999	0.432169616
3.45599985	0.430829436
3.46000004	0.494400978
3.46399999	0.306939811
3.46799994	0.473011374
3.47199988	0.461728007
3.47599983	0.451317191
3.48000002	0.443451762
3.48399997	0.437500775
3.48799992	0.43320033
3.49199986	0.430106342
3.49600005	0.427926749
3.5	0.426546514
3.50399995	0.425616682
3.5079999	0.424466103
3.51199985	0.424027801
3.51600003	0.424093872
3.51999998	0.423387438
3.52399993	0.422786921
3.52799988	0.422242999
3.53200006	0.421830177
3.53600001	0.420796692
3.53999996	0.420114309
3.54399991	0.418980122
3.54799986	0.417753428
3.55200005	0.416770846
3.55599999	0.415864795
3.55999994	0.414772928
3.56399989	0.413651139
3.56799984	0.41262418
3.57200003	0.411540449
3.57599998	0.410583645
3.57999992	0.409513146
3.58399987	0.408829719
3.58800006	0.407986552
3.59200001	0.407099038
3.59599996	0.406379938
3.5999999	0.405655801
3.60399985	0.40498209
3.60800004	0.404226243
3.61199999	0.403577924
3.61599994	0.402867734
3.61999989	0.402122825
3.62399983	0.401442081
3.62800002	0.400722653
3.63199997	0.399935365
3.63599992	0.399120212
3.63999987	0.398402512
3.64400005	0.397635788
3.648	0.396785319
3.65199995	0.395940274
3.6559999	0.395129383
3.65999985	0.394194305
3.66400003	0.393331438
3.66799998	0.392355412
3.67199993	0.391419321
3.67599988	0.390517205
3.68000007	0.389591187
3.68400002	0.388631552
3.68799996	0.387702018
3.69199991	0.386775792
3.69599986	0.385865062
3.70000005	0.38496092
3.704	0.384073615
3.70799994	0.383259386
3.71199989	0.382499516
3.71599984	0.381651759
3.72000003	0.381064117
3.72399998	0.380040616
3.72799993	0.380531222
3.73199987	0.379120886
3.73600006	0.37784481
3.74000001	0.3768996
3.74399996	0.376224935
3.74799991	0.375508904
3.75199986	0.375180513
3.75600004	0.375185728
3.75999999	0.374927282
3.76399994	0.374942958
3.76799989	0.374875933
3.77199984	0.374773085
3.77600002	0.374927104
3.77999997	0.375170171
3.78399992	0.375163704
3.78799987	0.375279814
3.79200006	0.375402659
3.796	0.375630856
3.79999995	0.376085162
3.8039999	0.374851793
3.80799985	0.376823694
3.81200004	0.376978636
3.81599998	0.376885563
3.81999993	0.377012491
3.82399988	0.377218544
3.82799983	0.377652496
3.83200002	0.376864314
3.83599997	0.378056556
3.83999991	0.378677666
3.84399986	0.379906774
3.84800005	0.380668312
3.852	0.381017953
3.85599995	0.382745117
3.8599999	0.38253969
3.86399984	0.382762343
3.86800003	0.382584214
3.87199998	0.386079252
3.87599993	0.369351745
3.87999988	0.376066536
3.88400006	0.366632581
3.88800001	0.356587589
3.89199996	0.356113493
3.89599991	0.357490093
3.89999986	0.364129543
3.90400004	0.333036482
3.90799999	0.388885498
3.91199994	0.334373862
3.91599989	0.360376418
3.91999984	0.356923223
3.92400002	0.376737177
3.92799997	0.399737537
3.93199992	0.433070451
3.93599987	0.451693058
3.94000006	0.450438976
3.94400001	0.446182966
3.94799995	0.444436282
3.9519999	0.442707956
3.95599985	0.446545452
3.96000004	0.443778753
3.96399999	0.446350932
3.96799994	0.448338807
3.97199988	0.449693441
3.97599983	0.450996965
3.98000002	0.451525152
3.98399997	0.454597771
3.98799992	0.459607661
3.99199986	0.471503764
3.99600005	0.463881195
4	0.47577244
4.00400019	0.485024333
4.00800037	0.496379972
4.01200008	0.505390942
4.01600027	0.512892067
4.01999998	0.525481701
4.02400017	0.53897661
4.02800035	0.548189104
4.03200006	0.553243458
4.03600025	0.554790914
4.03999996	0.553670883
4.04400015	0.549471319
4.04800034	0.543728113
4.05200005	0.536858559
4.05600023	0.529415607
4.06000042	0.522321403
4.06400013	0.516070127
4.06800032	0.511333644
4.07200003	0.508474708
4.07600021	0.507225513
4.0800004	0.507006288
4.08400011	0.507199228
4.0880003	0.508223116
4.09200001	0.51036638
4.09600019	0.514578342
4.10000038	0.520916641
4.10400009	0.527537882
4.10800028	0.54017216
4.11199999	0.557414353
4.11600018	0.575032771
4.12000036	0.587428808
4.12400007	0.596150339
4.12800026	0.602174282
4.13199997	0.606470048
4.13600016	0.609712899
4.14000034	0.610700369
4.14400005	0.611766219
4.14800024	0.611475766
4.15199995	0.611235738
4.15600014	0.609889805
4.16000032	0.609105289
4.16400003	0.608229339
4.16800022	0.606423974
4.17200041	0.60464561
4.17600012	0.603099942
4.18000031	0.602390885
4.18400002	0.601614952
4.1880002	0.600008368
4.19200039	0.598398924
4.1960001	0.597864866
4.20000029	0.59739089
4.204	0.59680903
4.20800018	0.596199393
4.21200037	0.595680356
4.21600008	0.595394313
4.22000027	0.594646871
4.22399998	0.594360232
4.22800016	0.594422996
4.23200035	0.5957008
4.23600006	0.596309721
4.24000025	0.59779191
4.24399996	0.599051476
4.24800014	0.600273669
4.25200033	0.600631356
4.25600004	0.601223886
4.26000023	0.60284996
4.26400042	0.604409516
4.26800013	0.605855525
4.27200031	0.607143462
4.27600002	0.608472526
4.28000021	0.609720469
4.2840004	0.610172033
4.28800011	0.611785233
4.29200029	0.612721145
4.296	0.613854527
4.30000019	0.61516118
4.30400038	0.61738956
4.30800009	0.619381011
4.31200027	0.621152699
4.31599998	0.622725427
4.32000017	0.624085844
4.32400036	0.625356615
4.32800007	0.62654233
4.33200026	0.627691269
4.33599997	0.628916144
4.34000015	0.629485965
4.34400034	0.630185604
4.34800005	0.631797373
4.35200024	0.633266687
4.35600042	0.634733737
4.36000013	0.635304928
4.36400032	0.635812879
4.36800003	0.637157202
4.37200022	0.638328612
4.3760004	0.639270425
4.38000011	0.64005971
4.3840003	0.639980257
4.38800001	0.639998853
4.3920002	0.640252948
4.39600039	0.640516222
4.4000001	0.640804946
4.40400028	0.641611397
4.40799999	0.642234445
4.41200018	0.642493486
4.41600037	0.642666399
4.42000008	0.642878473
4.42400026	0.642198443
4.42799997	0.641738415
4.43200016	0.64138931
4.43600035	0.641090572
4.44000006	0.640834272
4.44400024	0.640557647
4.44799995	0.640257835
4.45200014	0.639845192
4.45600033	0.639310777
4.46000004	0.639204264
4.46400023	0.638900995
4.46800041	0.637951255
4.47200012	0.636897802
4.47600031	0.636003435
4.48000002	0.635107219
4.48400021	0.634311378
4.48800039	0.633524239
4.4920001	0.632742345
4.49600029	0.632484436
4.5	0.63166523
4.50400019	0.630815148
4.50800037	0.627442002
4.51200008	0.623585641
4.51600027	0.629900634
4.51999998	0.630344391
4.52400017	0.629620731
4.52800035	0.628246963
4.53200006	0.627272904
4.53600025	0.62621057
4.53999996	0.62498951
4.54400015	0.623526931
4.54800034	0.622556269
4.55200005	0.621268272
4.55600023	0.619997084
4.56000042	0.618781507
4.56400013	0.61765784
4.56800032	0.60414207
4.57200003	0.617572308
4.57600021	0.617044806
4.5800004	0.605406582
4.58400011	0.615907013
4.5880003	0.614924073
4.59200001	0.613385141
4.59600019	0.611715555
4.60000038	0.610091925
4.60400009	0.608587384
4.60800028	0.6070925
4.61199999	0.605650842
4.61600018	0.604240119
4.62000036	0.602838755
4.62400007	0.601511359
4.62800026	0.600224495
4.63199997	0.598923802
4.63600016	0.597651184
4.64000034	0.596466899
4.64400005	0.595270872
4.64800024	0.594111562
4.65199995	0.592967629
4.65600014	0.591815174
4.66000032	0.590767622
4.66400003	0.589730978
4.66800022	0.58863312
4.67200041	0.587714136
4.67600012	0.586784124
4.68000031	0.585864127
4.68400002	0.585036933
4.6880002	0.584168434
4.69200039	0.583447039
4.6960001	0.582644701
4.70000029	0.582069039
4.704	0.581285715
4.70800018	0.580678821
4.71200037	0.58005023
4.71600008	0.579418361
4.72000027	0.578864276
4.72399998	0.578213751
4.72800016	0.577627122
4.73200035	0.577175677
4.73600006	0.576626837
4.74000025	0.576078355
4.74399996	0.575541377
4.74800014	0.575070381
4.75200033	0.574732304
4.75600004	0.574350238
4.76000023	0.573972464
4.76400042	0.573616326
4.76800013	0.573493063
4.77200031	0.573299944
4.77600002	0.573238492
4.78000021	0.573146641
4.7840004	0.573230803
4.78800011	0.573286176
4.79200029	0.573408127
4.796	0.573439896
4.80000019	0.573686123
4.80400038	0.573944092
4.80800009	0.574320018
4.81200027	0.574644029
4.81599998	0.574972451
4.82000017	0.575410008
4.82400036	0.575880587
4.82800007	0.576378942
4.83200026	0.576736212
4.83599997	0.577083588
4.84000015	0.577442706
4.84400034	0.577843547
4.84800005	0.578428388
4.85200024	0.578963101
4.85600042	0.579233468
4.86000013	0.579838276
4.86400032	0.580393195
4.86800003	0.581064224
4.87200022	0.581688046
4.8760004	0.582297742
4.88000011	0.582660139
4.8840003	0.583640158
4.88800001	0.584168375
4.8920002	0.584738255
4.89600039	0.58555913
4.9000001	0.586212873
4.90400028	0.530524373
4.90799999	0.514088929
4.91200018	0.612660348
4.91600037	0.535157204
4.92000008	0.604023337
4.92400026	0.610844254
4.92799997	0.613850296
4.93200016	0.590684593
4.93600035	0.574039698
4.94000006	0.558515429
4.94400024	0.566902339
4.94799995	0.569462955
4.95200014	0.576751947
4.95600033	0.590422988
4.96000004	0.610295832
4.96400023	0.623834431
4.96800041	0.645067215
4.97200012	0.653080404
4.97600031	0.658784986
4.98000002	0.662572622
4.98400021	0.666956365
4.98800039	0.669368505
4.9920001	0.67442584
4.99600029	0.672849357
5	0.678182125
5.00400019	0.683607459
5.00800037	0.689798653
5.01200008	0.698279858
5.01600027	0.709541857
5.01999998	0.729523003
5.02400017	0.760601878
5.02800035	0.788738787
5.03200006	0.818356693
5.03600025	0.832203865
5.03999996	0.834410667
5.04400015	0.831730902
5.04800034	0.822035313
5.05200005	0.798998713
5.05600023	0.779611707
5.06000042	0.761986792
5.06400013	0.746253967
5.06800032	0.732591212
5.07200003	0.720437706
5.07600021	0.709677517
5.0800004	0.700464785
5.08400011	0.693361521
5.0880003	0.68775475
5.09200001	0.688647985
5.09600019	0.689995587
5.10000038	0.691781223
5.10400009	0.727113008
5.10800028	0.73138535
5.11199999	0.731065929
5.11600018	0.731061041
5.12000036	0.730298877
5.12400007	0.72934705
5.12800026	0.72861737
5.13199997	0.728324234
5.13600016	0.728275955
5.14000034	0.728351414
5.14400005	0.728141427
5.14800024	0.745394468
5.15199995	0.764877617
5.15600014	0.783463001
5.16000032	0.799816608
5.16400003	0.812820137
5.16800022	0.822091818
5.17200041	0.822041631
5.17600012	0.821749449
5.18000031	0.821403742
