# Supplementary material for: Universal Walking Control Framework of Biped Robot Based on Dynamic Model and Quadratic Programming
Source: Hindawi journal article supplement (doi:10.1155/2020/2789039), 2020-10-31
Supplement: f1 [file 2789039.f1.zip › Force control/Yzmp]

1.1839999	0.108085677
1.18799996	0.108080186
1.19199991	0.108214289
1.19599998	0.10830418
1.19999993	0.108172104
1.204	0.10868416
1.20799994	0.108911574
1.21199989	0.108971372
1.21599996	0.109046049
1.21999991	0.108843714
1.22399998	0.108784735
1.22799993	0.108799577
1.23199999	0.108776465
1.23599994	0.109072693
1.23999989	0.108934402
1.24399996	0.109117575
1.24799991	0.109055929
1.25199997	0.10900829
1.25599992	0.108893722
1.25999999	0.109088294
1.26399994	0.109206222
1.26800001	0.109205991
1.27199996	0.109344855
1.2759999	0.10932599
1.27999997	0.109365337
1.28399992	0.109171614
1.28799999	0.109107241
1.29199994	0.109074399
1.296	0.109388493
1.29999995	0.109363906
1.3039999	0.109279476
1.30799997	0.109473579
1.31199992	0.109602474
1.31599998	0.10965687
1.31999993	0.10966441
1.324	0.109519407
1.32799995	0.10971529
1.3319999	0.109577812
1.33599997	0.109510295
1.33999991	0.109489836
1.34399998	0.109441139
1.34799993	0.10974519
1.352	0.109667391
1.35599995	0.10962414
1.3599999	0.109511487
1.36399996	0.10974659
1.36799991	0.109854452
1.37199998	0.109924324
1.37599993	0.109766029
1.38	0.109646492
1.38399994	0.109559856
1.38799989	0.109748781
1.39199996	0.109583504
1.39599991	0.109811485
1.39999998	0.109783843
1.40399992	0.109671094
1.40799999	0.109565772
1.41199994	0.109549828
1.41599989	0.109481268
1.41999996	0.109751977
1.42399991	0.109639831
1.42799997	0.109856486
1.43199992	0.109767966
1.43599999	0.109727748
1.43999994	0.10971234
1.44400001	0.109641977
1.44799995	0.109891556
1.4519999	0.109737225
1.45599997	0.109663241
1.45999992	0.108955197
1.46399999	0.109080903
1.46799994	0.109082736
1.472	0.109104782
1.47599995	0.108863153
1.4799999	0.108749613
1.48399997	0.10872981
1.48799992	0.108727776
1.49199998	0.108677886
1.49599993	0.108563401
1.5	0.108798414
1.50399995	0.108575061
1.5079999	0.108368076
1.51199996	0.108501591
1.51599991	0.108577296
1.51999998	0.108237125
1.52399993	0.108402833
1.528	0.108114764
1.53199995	0.10831707
1.53599989	0.108121425
1.53999996	0.108126521
1.54399991	0.107718296
1.54799998	0.107916653
1.55199993	0.10813646
1.55599999	0.108235255
1.55999994	0.10787978
1.56399989	0.107798897
1.56799996	0.107828505
1.57199991	0.108215101
1.57599998	0.108061254
1.57999992	0.107725382
1.58399999	0.107735582
1.58799994	0.10778223
1.59200001	0.108251989
1.59599996	0.107938051
1.5999999	0.108231425
1.60399997	0.108580858
1.60799992	0.108538814
1.61199999	0.108378358
1.61599994	0.108285554
1.62	0.108518578
1.62399995	0.10759563
1.6279999	0.108026125
1.63199997	0.1086393
1.63599992	0.108819559
1.63999999	0.108801752
1.64399993	0.108340137
1.648	0.108796686
1.65199995	0.1078908
1.6559999	0.108360916
1.65999997	0.108744092
1.66399992	0.108435631
1.66799998	0.108655371
1.67199993	0.108608045
1.676	0.111029305
1.67999995	0.108403265
1.6839999	0.108103894
1.68799996	0.108232498
1.69199991	0.107947379
1.69599998	0.108308062
1.69999993	0.108471654
1.704	0.108538114
1.70799994	0.108719438
1.71199989	0.108000971
1.71599996	0.108425461
1.71999991	0.108531162
1.72399998	0.108688131
1.72799993	0.107895173
1.73199999	0.108420819
1.73599994	0.107786469
1.73999989	0.108142652
1.74399996	0.108132236
1.74799991	0.108190477
1.75199997	0.107374482
1.75599992	0.107855797
1.75999999	0.10716743
1.76399994	0.107505046
1.76800001	0.107484587
1.77199996	0.107319698
1.7759999	0.107098535
1.77999997	0.106901109
1.78399992	0.106713295
1.78799999	0.106529355
1.79199994	0.106352426
1.796	0.106168136
1.79999995	0.106316395
1.8039999	0.106053069
1.80799997	0.105763234
1.81199992	0.105653793
1.81599998	0.1048766
1.81999993	0.104349285
1.824	0.104631431
1.82799995	0.104521446
1.8319999	0.104651764
1.83599997	0.103017591
1.83999991	0.102857761
1.84399998	0.10284254
1.84799993	0.102796353
1.852	0.102667779
1.85599995	0.102283567
1.8599999	0.101747282
1.86399996	0.102085106
1.86799991	0.100973412
1.87199998	0.101168193
1.87599993	0.100309275
1.88	0.0996013656
1.88399994	0.0999714509
1.88799989	0.0999448225
1.89199996	0.09942846
1.89599991	0.0998021662
1.89999998	0.0987429172
1.90399992	0.157764882
1.90799999	0.133170575
1.91199994	0.110965461
1.91599989	0.0192872845
1.91999996	0.142237008
1.92399991	0.0717721283
1.92799997	0.0102316421
1.93199992	0.121442705
1.93599999	0.0781385228
1.93999994	0.0532814488
1.94400001	0.0348081999
1.94799995	0.0315754972
1.9519999	0.0389962979
1.95599997	0.0479589328
1.95999992	0.0646726489
1.96399999	0.0719529837
1.96799994	0.0770902559
1.972	0.0733849853
1.97599995	0.0709382296
1.9799999	0.0698472932
1.98399997	0.0679378659
1.98799992	0.0575294308
1.99199998	0.0490709431
1.99599993	0.0379635729
2	0.0261867959
2.00399995	0.0153199937
2.0079999	0.00316932751
2.01199985	-0.0142461713
2.01600003	-0.0206876118
2.01999998	-0.0177740157
2.02399993	-0.00956144929
2.02799988	-0.00426260754
2.03200006	0.000120317192
2.03600001	0.00170600216
2.03999996	-0.00334816589
2.04399991	-0.0116054341
2.04799986	-0.0235465765
2.05200005	-0.0287613068
2.05599999	-0.0310430899
2.05999994	-0.0334263556
2.06399989	-0.0364638194
2.06799984	-0.0393075086
2.07200003	-0.0439049192
2.07599998	-0.0502928533
2.07999992	-0.0560038239
2.08399987	-0.0619342588
2.08800006	-0.066607818
2.09200001	-0.071119003
2.09599996	-0.0776137561
2.0999999	-0.0836112797
2.10399985	-0.0802994445
2.10800004	-0.0844088122
2.11199999	-0.0851309747
2.11599994	-0.0823461041
2.11999989	-0.0827212781
2.12399983	-0.0827334449
2.12800002	-0.0874870047
2.13199997	-0.0919452682
2.13599992	-0.0962133855
2.13999987	-0.0999755934
2.14400005	-0.103683949
2.148	-0.104985528
2.15199995	-0.105738349
2.1559999	-0.105967589
2.15999985	-0.10591998
2.16400003	-0.105633751
2.16799998	-0.10518381
2.17199993	-0.104609825
2.17599988	-0.104017481
2.18000007	-0.103442244
2.18400002	-0.102892891
2.18799996	-0.102349319
2.19199991	-0.101829767
2.19599986	-0.101427965
2.20000005	-0.101234667
2.204	-0.101239271
2.20799994	-0.101393104
2.21199989	-0.10168235
2.21599984	-0.102029763
2.22000003	-0.10241282
2.22399998	-0.102794513
2.22799993	-0.103179194
2.23199987	-0.10359662
2.23600006	-0.10401804
2.24000001	-0.104349598
2.24399996	-0.104596645
2.24799991	-0.104786746
2.25199986	-0.104946539
2.25600004	-0.10504166
2.25999999	-0.105156742
2.26399994	-0.105261683
2.26799989	-0.105394088
2.27199984	-0.105608054
2.27600002	-0.105721466
2.27999997	-0.105845146
2.28399992	-0.10585811
2.28799987	-0.105981931
2.29200006	-0.106093779
2.296	-0.106158078
2.29999995	-0.106216177
2.3039999	-0.106200799
2.30799985	-0.10631676
2.31200004	-0.106515616
2.31599998	-0.106714152
2.31999993	-0.106743395
2.32399988	-0.106797025
2.32799983	-0.106761642
2.33200002	-0.106685847
2.33599997	-0.106773816
2.33999991	-0.106833287
2.34399986	-0.106960855
2.34800005	-0.106980033
2.352	-0.106983908
2.35599995	-0.106856219
2.3599999	-0.106770031
2.36399984	-0.106713705
2.36800003	-0.106773891
2.37199998	-0.10682112
2.37599993	-0.10686221
2.37999988	-0.106800981
2.38400006	-0.10681767
2.38800001	-0.106678344
2.39199996	-0.106607586
2.39599991	-0.106452174
2.39999986	-0.106542379
2.40400004	-0.106593497
2.40799999	-0.106615193
2.41199994	-0.106502876
2.41599989	-0.105597384
2.41999984	-0.106053449
2.42400002	-0.10600587
2.42799997	-0.105900951
2.43199992	-0.105375618
2.43599987	-0.104622997
2.44000006	-0.104449868
2.44400001	-0.106598921
2.44799995	-0.110940546
2.4519999	-0.105595827
2.45599985	-0.106256053
2.46000004	-0.102186613
2.46399999	-0.0985690728
2.46799994	-0.0989344046
2.47199988	-0.102017984
2.47599983	-0.100988634
2.48000002	-0.101879671
2.48399997	-0.10158892
2.48799992	-0.102271572
2.49199986	-0.102546245
2.49600005	-0.102545418
2.5	-0.102585025
2.50399995	-0.102078035
2.5079999	-0.102314733
2.51199985	-0.102489382
2.51600003	-0.102337323
2.51999998	-0.102094568
2.52399993	-0.102175161
2.52799988	-0.10215947
2.53200006	-0.102069885
2.53600001	-0.101935126
2.53999996	-0.101800196
2.54399991	-0.101846471
2.54799986	-0.101694681
2.55200005	-0.1015331
2.55599999	-0.101618245
2.55999994	-0.101632632
2.56399989	-0.101567462
2.56799984	-0.101756454
2.57200003	-0.101801991
2.57599998	-0.101929545
2.57999992	-0.102136485
2.58399987	-0.102339759
2.58800006	-0.102573641
2.59200001	-0.102793574
2.59599996	-0.103045985
2.5999999	-0.103305489
2.60399985	-0.103498667
2.60800004	-0.103734896
2.61199999	-0.103919819
2.61599994	-0.10402853
2.61999989	-0.104077794
2.62399983	-0.104022406
2.62800002	-0.103990294
2.63199997	-0.103918634
2.63599992	-0.103794418
2.63999987	-0.103689313
2.64400005	-0.103550173
2.648	-0.103410855
2.65199995	-0.10330119
2.6559999	-0.10316553
2.65999985	-0.103087857
2.66400003	-0.103025772
2.66799998	-0.10293828
2.67199993	-0.10286878
2.67599988	-0.10295739
2.68000007	-0.102961272
2.68400002	-0.103071466
2.68799996	-0.103254355
2.69199991	-0.10343039
2.69599986	-0.103801526
2.70000005	-0.104085751
2.704	-0.104393065
2.70799994	-0.10466034
2.71199989	-0.104884237
2.71599984	-0.105143763
2.72000003	-0.105273582
2.72399998	-0.105376653
2.72799993	-0.105594866
2.73199987	-0.105675392
2.73600006	-0.105773374
2.74000001	-0.105837263
2.74399996	-0.105897024
2.74799991	-0.105918743
2.75199986	-0.105909064
2.75600004	-0.105885349
2.75999999	-0.106161483
2.76399994	-0.110050559
2.76799989	-0.10574656
2.77199984	-0.105006941
2.77600002	-0.104695775
2.77999997	-0.104687095
2.78399992	-0.105018109
2.78799987	-0.105094381
2.79200006	-0.104555294
2.796	-0.105103135
2.79999995	-0.10507711
2.8039999	-0.105182454
2.80799985	-0.10520196
2.81200004	-0.105024353
2.81599998	-0.104660653
2.81999993	-0.104440816
2.82399988	-0.104290172
2.82799983	-0.103863671
2.83200002	-0.103392355
2.83599997	-0.102839485
2.83999991	-0.102447219
2.84399986	-0.10038276
2.84800005	-0.101842895
2.852	-0.101725198
2.85599995	-0.101470366
2.8599999	-0.101146325
2.86399984	-0.100835592
2.86800003	-0.100335509
2.87199998	-0.0997769013
2.87599993	-0.099390693
2.87999988	-0.0990951881
2.88400006	-0.0988215059
2.88800001	-0.098556228
2.89199996	-0.0983307362
2.89599991	-0.0981768444
2.89999986	-0.098063536
2.90400004	-0.158094585
2.90799999	-0.0790067092
2.91199994	-0.0341139734
2.91599989	-0.0889109075
2.91999984	-0.0964431912
2.92400002	-0.0907380506
2.92799997	-0.0792852864
2.93199992	-0.0712278709
2.93599987	-0.0698919669
2.94000006	-0.0717947036
2.94400001	-0.0755615979
2.94799995	-0.0940262899
2.9519999	-0.0916584432
2.95599985	-0.0773649514
2.96000004	-0.0671801046
2.96399999	-0.0592834316
2.96799994	-0.0561006591
2.97199988	-0.055143714
2.97599983	-0.0495228469
2.98000002	-0.0449244641
2.98399997	-0.0385889746
2.98799992	-0.031639941
2.99199986	-0.0258249175
2.99600005	-0.0200869348
3	-0.0152981412
3.00399995	-0.0108888401
3.0079999	-0.00614155782
3.01199985	-0.000908673275
3.01600003	0.00609178841
3.01999998	0.0151884891
3.02399993	0.0222245511
3.02799988	0.0232401732
3.03200006	0.0148738921
3.03600001	0.00517549412
3.03999996	-0.00279742945
3.04399991	-0.00485645141
3.04799986	0.00249645906
3.05200005	0.0167979114
3.05599999	0.0348062441
3.05999994	0.0506831184
3.06399989	0.0569077209
3.06799984	0.0573505089
3.07200003	0.0546686463
3.07599998	0.0528190061
3.07999992	0.0531114526
3.08399987	0.0560349524
3.08800006	0.0609851666
3.09200001	0.0668352544
3.09599996	0.0733253881
3.0999999	0.0798174143
3.10399985	0.0861734524
3.10800004	0.082882084
3.11199999	0.083426185
3.11599994	0.0875601321
3.11999989	0.092934683
3.12399983	0.101812825
3.12800002	0.104619227
3.13199997	0.105608128
3.13599992	0.105685361
3.13999987	0.105348177
3.14400005	0.105082415
3.148	0.104902528
3.15199995	0.104738265
3.1559999	0.104745239
3.15999985	0.106623992
3.16400003	0.106887251
3.16799998	0.109813489
3.17199993	0.109465651
3.17599988	0.109835528
3.18000007	0.110457651
3.18400002	0.111060217
3.18799996	0.111616477
3.19199991	0.112019084
3.19599986	0.112247154
3.20000005	0.112329565
3.204	0.112262391
3.20799994	0.1121362
3.21199989	0.111945629
3.21599984	0.111790866
3.22000003	0.111685827
3.22399998	0.111646011
3.22799993	0.111665964
3.23199987	0.111797169
3.23600006	0.111941427
3.24000001	0.112079225
3.24399996	0.112203039
3.24799991	0.112265639
3.25199986	0.112249203
3.25600004	0.112179533
3.25999999	0.1120845
3.26399994	0.11196553
3.26799989	0.111837894
3.27199984	0.100251123
3.27600002	0.149231672
3.27999997	0.127731085
3.28399992	0.119892389
3.28799987	0.111937225
3.29200006	0.105088025
3.296	0.101051599
3.29999995	0.0997472033
3.3039999	0.0999915898
3.30799985	0.100923367
3.31200004	0.101963371
3.31599998	0.102810167
3.31999993	0.103586897
3.32399988	0.104319282
3.32799983	0.0904140696
3.33200002	0.161215082
3.33599997	0.120595567
3.33999991	0.112244062
3.34399986	0.104190104
3.34800005	0.100784756
3.352	0.0984486789
3.35599995	0.0978363082
3.3599999	0.0980758145
3.36399984	0.0985877886
3.36800003	0.0992266536
3.37199998	0.100199804
3.37599993	0.100892447
3.37999988	0.102031142
3.38400006	0.102773957
3.38800001	0.103584237
3.39199996	0.104250453
3.39599991	0.105067186
3.39999986	0.105220929
3.40400004	0.105673671
3.40799999	0.106037609
3.41199994	0.106272079
3.41599989	0.106722802
3.41999984	0.106967017
3.42400002	0.107258528
3.42799997	0.105861627
3.43199992	0.109428741
3.43599987	0.109017074
3.44000006	0.104738027
3.44400001	0.10521505
3.44799995	0.104671523
3.4519999	0.107800059
3.45599985	0.107523762
3.46000004	0.0979210138
3.46399999	0.167678013
3.46799994	0.188093364
3.47199988	0.135855108
3.47599983	0.119859442
3.48000002	0.107398532
3.48399997	0.098197028
3.48799992	0.091529727
3.49199986	0.0872876346
3.49600005	0.0843603536
3.5	0.0796935186
3.50399995	0.0746509284
3.5079999	0.0914705098
3.51199985	0.0902164504
3.51600003	0.0718943328
3.51999998	0.0809363797
3.52399993	0.0855012164
3.52799988	0.0854008347
3.53200006	0.077289544
3.53600001	0.088304095
3.53999996	0.0849601701
3.54399991	0.0927820206
3.54799986	0.102158308
3.55200005	0.0999491587
3.55599999	0.0938874483
3.55999994	0.0950447395
3.56399989	0.0963563547
3.56799984	0.0975115746
3.57200003	0.0984511524
3.57599998	0.0994261578
3.57999992	0.10477946
3.58399987	0.0995847136
3.58800006	0.100406677
3.59200001	0.101221502
3.59599996	0.101415507
3.5999999	0.102088496
3.60399985	0.102274112
3.60800004	0.108637542
3.61199999	0.101128243
3.61599994	0.101871021
3.61999989	0.102337517
3.62399983	0.109668575
3.62800002	0.100899592
3.63199997	0.101545259
3.63599992	0.103646971
3.63999987	0.102280028
3.64400005	0.102623925
3.648	0.102958262
3.65199995	0.103304558
3.6559999	0.10345383
3.65999985	0.103740387
3.66400003	0.103888802
3.66799998	0.104118869
3.67199993	0.104251787
3.67599988	0.104339026
3.68000007	0.104387216
3.68400002	0.104211934
3.68799996	0.104280107
3.69199991	0.104627043
3.69599986	0.104434393
3.70000005	0.105396181
3.704	0.105460592
3.70799994	0.105327994
3.71199989	0.104859516
3.71599984	0.104752481
3.72000003	0.105304509
3.72399998	0.104893833
3.72799993	0.102416098
3.73199987	0.102704182
3.73600006	0.10292615
3.74000001	0.103139929
3.74399996	0.103764579
3.74799991	0.104403786
3.75199986	0.1047052
3.75600004	0.105471581
3.75999999	0.10409908
3.76399994	0.104065955
3.76799989	0.103914477
3.77199984	0.103841513
3.77600002	0.103776835
3.77999997	0.103067279
3.78399992	0.103157505
3.78799987	0.1030505
3.79200006	0.102733836
3.796	0.102523275
3.79999995	0.100765988
3.8039999	0.105136454
3.80799985	0.10125006
3.81200004	0.100634187
3.81599998	0.100708626
3.81999993	0.100507163
3.82399988	0.100292437
3.82799983	0.0989113897
3.83200002	0.101681001
3.83599997	0.100783885
3.83999991	0.0976021886
3.84399986	0.100370593
3.84800005	0.0998022035
3.852	0.100374505
3.85599995	0.0974073857
3.8599999	0.0967860594
3.86399984	0.0977848396
3.86800003	0.0973980203
3.87199998	0.0889907479
3.87599993	0.0844339579
3.87999988	0.0783125684
3.88400006	0.0927885845
3.88800001	0.0876595378
3.89199996	0.0916857943
3.89599991	0.092723608
3.89999986	0.0961646587
3.90400004	0.136280984
3.90799999	0.0475327857
3.91199994	0.0894230008
3.91599989	0.0801115111
3.91999984	0.0903247967
3.92400002	0.0851607546
3.92799997	0.0803957805
3.93199992	0.0984672233
3.93599987	0.0988265425
3.94000006	0.0909041241
3.94400001	0.0790060908
3.94799995	0.0722663328
3.9519999	0.0563893951
3.95599985	0.0712155402
3.96000004	0.0509024672
3.96399999	0.0606020726
3.96799994	0.055394534
3.97199988	0.0502879992
3.97599983	0.043273896
3.98000002	0.0349347852
3.98399997	0.0297541376
3.98799992	0.0268385969
3.99199986	0.00946903322
3.99600005	0.0262535177
4	0.020433709
4.00400019	0.0163099673
4.00800037	0.0117072677
4.01200008	0.0101033775
4.01600027	0.000677292002
4.01999998	-0.00299588218
4.02400017	-0.00429571886
4.02800035	-0.00459997216
4.03200006	-0.00546076102
4.03600025	-0.00787459221
4.03999996	-0.0105740931
4.04400015	-0.0146921743
4.04800034	-0.0194361713
4.05200005	-0.0243893862
4.05600023	-0.0292852297
4.06000042	-0.0345930941
4.06400013	-0.0395419598
4.06800032	-0.0445394404
4.07200003	-0.0492036417
4.07600021	-0.0533667654
4.0800004	-0.0578994602
4.08400011	-0.0628581271
4.0880003	-0.0680095404
4.09200001	-0.0732089952
4.09600019	-0.0786192566
4.10000038	-0.0835103169
4.10400009	-0.0906792507
4.10800028	-0.0900502726
4.11199999	-0.0919200704
4.11600018	-0.0861568004
4.12000036	-0.0913030356
4.12400007	-0.0942909345
4.12800026	-0.0966531187
4.13199997	-0.0980005115
4.13600016	-0.0987131298
4.14000034	-0.0999562144
4.14400005	-0.100406155
4.14800024	-0.101222813
4.15199995	-0.101436257
4.15600014	-0.102063805
4.16000032	-0.101995669
4.16400003	-0.101682849
4.16800022	-0.101968713
4.17200041	-0.102262475
4.17600012	-0.102491468
4.18000031	-0.101792254
4.18400002	-0.10109432
4.1880002	-0.101366155
4.19200039	-0.101854526
4.1960001	-0.101488605
4.20000029	-0.101213954
4.204	-0.101170085
4.20800018	-0.101351418
4.21200037	-0.10171742
4.21600008	-0.102050044
4.22000027	-0.103083774
4.22399998	-0.103890575
4.22800016	-0.104536943
4.23200035	-0.103752613
4.23600006	-0.10393215
4.24000025	-0.103307515
4.24399996	-0.102916375
4.24800014	-0.102764316
4.25200033	-0.103748709
4.25600004	-0.104728773
4.26000023	-0.104475982
4.26400042	-0.104164481
4.26800013	-0.104029112
4.27200031	-0.104128897
4.27600002	-0.104416206
4.28000021	-0.104747064
4.2840004	-0.106076106
4.28800011	-0.105985172
4.29200029	-0.106720261
4.296	-0.107211605
4.30000019	-0.107457891
4.30400038	-0.10643211
4.30800009	-0.10569711
4.31200027	-0.10534896
4.31599998	-0.10538727
4.32000017	-0.105691552
4.32400036	-0.106116407
4.32800007	-0.106552459
4.33200026	-0.106962956
4.33599997	-0.107184246
4.34000015	-0.108205542
4.34400034	-0.108914591
4.34800005	-0.108298078
4.35200024	-0.107638031
4.35600042	-0.107075118
4.36000013	-0.107633702
4.36400032	-0.108156815
4.36800003	-0.107521661
4.37200022	-0.106967814
4.3760004	-0.10662625
4.38000011	-0.106445827
4.3840003	-0.107405476
4.38800001	-0.108094528
4.3920002	-0.108271688
4.39600039	-0.108190618
4.4000001	-0.10796947
4.40400028	-0.106842622
4.40799999	-0.106023878
4.41200018	-0.105666377
4.41600037	-0.105580501
4.42000008	-0.106033489
4.42400026	-0.106724598
4.42799997	-0.10700354
4.43200016	-0.106935926
4.43600035	-0.106635727
4.44000006	-0.106216006
4.44400024	-0.105789743
4.44799995	-0.105373673
4.45200014	-0.105064966
4.45600033	-0.104927443
4.46000004	-0.104194134
4.46400023	-0.103644669
4.46800041	-0.104115635
4.47200012	-0.104583614
4.47600031	-0.104948379
4.48000002	-0.10511788
4.48400021	-0.105086677
4.48800039	-0.104934014
4.4920001	-0.104781747
4.49600029	-0.103653103
4.5	-0.103504479
4.50400019	-0.103647523
4.50800037	-0.107497863
4.51200008	-0.110307805
4.51600027	-0.104204021
4.51999998	-0.0991347507
4.52400017	-0.0989975333
4.52800035	-0.100093566
4.53200006	-0.100802802
4.53600025	-0.10267549
4.53999996	-0.10203851
4.54400015	-0.10257151
4.54800034	-0.102268904
4.55200005	-0.102560669
4.55600023	-0.102761313
4.56000042	-0.102842756
4.56400013	-0.102836967
4.56800032	-0.114626154
4.57200003	-0.101441532
4.57600021	-0.0997244418
4.5800004	-0.113708466
4.58400011	-0.0989450663
4.5880003	-0.0980860591
4.59200001	-0.0985959917
4.59600019	-0.0999686047
4.60000038	-0.10127379
4.60400009	-0.102250561
4.60800028	-0.102919146
4.61199999	-0.103332922
4.61600018	-0.103616275
4.62000036	-0.103842475
4.62400007	-0.104065508
4.62800026	-0.104263917
4.63199997	-0.104475237
4.63600016	-0.104685664
4.64000034	-0.104879163
4.64400005	-0.105051599
4.64800024	-0.105244048
4.65199995	-0.105479218
4.65600014	-0.105631836
4.66000032	-0.105804987
4.66400003	-0.105966121
4.66800022	-0.106084228
4.67200041	-0.106264047
4.67600012	-0.106376894
4.68000031	-0.106528476
4.68400002	-0.10664764
4.6880002	-0.106756426
4.69200039	-0.106942259
4.6960001	-0.107090071
4.70000029	-0.107029095
4.704	-0.107159548
4.70800018	-0.107290089
4.71200037	-0.107333958
4.71600008	-0.107371323
4.72000027	-0.107388347
4.72399998	-0.10743317
4.72800016	-0.107493408
4.73200035	-0.107604966
4.73600006	-0.107852519
4.74000025	-0.107868209
4.74399996	-0.107971922
4.74800014	-0.107930481
4.75200033	-0.107898302
4.75600004	-0.107862338
4.76000023	-0.107791089
4.76400042	-0.107681975
4.76800013	-0.107964024
4.77200031	-0.107689828
4.77600002	-0.107562184
4.78000021	-0.107337929
4.7840004	-0.10716594
4.78800011	-0.107006103
4.79200029	-0.106786586
4.796	-0.10652931
4.80000019	-0.106262192
4.80400038	-0.105988599
4.80800009	-0.105751015
4.81200027	-0.105441578
4.81599998	-0.10514842
4.82000017	-0.104856156
4.82400036	-0.10454116
4.82800007	-0.10429281
4.83200026	-0.103981785
4.83599997	-0.103667974
4.84000015	-0.103343233
4.84400034	-0.10292092
4.84800005	-0.10270042
4.85200024	-0.102406941
4.85600042	-0.102031358
4.86000013	-0.101702347
4.86400032	-0.101504818
4.86800003	-0.101092301
4.87200022	-0.100799769
4.8760004	-0.100527786
4.88000011	-0.0999989733
4.8840003	-0.100037828
4.88800001	-0.0997704864
4.8920002	-0.0990723893
4.89600039	-0.0991956219
4.9000001	-0.0989631563
4.90400028	-0.156357214
4.90799999	-0.138410896
4.91200018	-0.0359275639
4.91600037	-0.0797125697
4.92000008	-0.0673778206
4.92400026	-0.0669991449
4.92799997	-0.0845760033
4.93200016	-0.0811551139
4.93600035	-0.0886916816
4.94000006	-0.0787841305
4.94400024	-0.073005043
4.94799995	-0.0701972693
4.95200014	-0.0711823553
4.95600033	-0.0669353306
4.96000004	-0.0682164952
4.96400023	-0.0552714393
4.96800041	-0.0541251004
4.97200012	-0.0448091514
4.97600031	-0.0570465252
4.98000002	-0.0559303612
4.98400021	-0.05048915
4.98800039	-0.0388925523
4.9920001	-0.0318436734
4.99600029	-0.0229303055
5	-0.0163496789
5.00400019	-0.0116842128
5.00800037	-0.00646761851
5.01200008	-0.00140849676
5.01600027	0.00481768372
5.01999998	0.0157046113
5.02400017	0.0274513755
5.02800035	0.0299377367
5.03200006	0.0218492076
5.03600025	0.0157439113
5.03999996	0.0123246321
5.04400015	0.0134565979
5.04800034	0.018135462
5.05200005	0.0219130814
5.05600023	0.0268910695
5.06000042	0.0314958617
5.06400013	0.0359040201
5.06800032	0.0403942056
5.07200003	0.0451142676
5.07600021	0.0500699319
5.0800004	0.0552452244
5.08400011	0.0605765842
5.0880003	0.0654301122
5.09200001	0.0703173354
5.09600019	0.0761902854
5.10000038	0.0817014426
5.10400009	0.0853037685
5.10800028	0.08367531
5.11199999	0.0814317167
5.11600018	0.0817426443
5.12000036	0.0949726775
5.12400007	0.101068318
5.12800026	0.104443975
5.13199997	0.105164029
5.13600016	0.104269445
5.14000034	0.102921143
5.14400005	0.101900674
5.14800024	0.101041824
5.15199995	0.101252697
5.15600014	0.103258424
5.16000032	0.104570046
5.16400003	0.105660558
5.16800022	0.106650606
5.17200041	0.10666246
5.17600012	0.106641747
5.18000031	0.106605344
