# Supplementary material for: Universal Walking Control Framework of Biped Robot Based on Dynamic Model and Quadratic Programming
Source: Hindawi journal article supplement (doi:10.1155/2020/2789039), 2020-10-31
Supplement: f1 [file 2789039.f1.zip › Position control/FT z left]

0.00999999978	0.000119314223
0.0199999996	-16.6537056
0.0299999993	12.5048714
0.0399999991	822.220947
0.049999997	548.885864
0.0600000024	311.45282
0.0700000003	287.987793
0.0799999982	283.898499
0.0899999961	283.012085
0.100000001	281.985352
0.109999999	285.304626
0.119999997	286.730316
0.129999995	285.682159
0.140000001	280.170624
0.150000006	281.069031
0.160000011	282.015564
0.170000002	285.322205
0.180000007	285.604492
0.190000013	286.606506
0.200000003	287.565979
0.210000008	290.31897
0.219999999	290.207642
0.230000004	290.688599
0.24000001	290.06543
0.25	290.862946
0.25999999	292.409912
0.269999981	291.37323
0.280000001	292.377014
0.289999992	292.433228
0.299999982	292.355469
0.310000002	292.604065
0.319999993	291.877655
0.329999983	291.120972
0.340000004	333.045288
0.349999994	293.216309
0.359999985	24.3488178
0.370000005	318.406616
0.379999995	221.538269
0.389999986	267.780518
0.399999976	267.438507
0.409999996	256.069611
0.419999987	268.368896
0.429999977	272.576416
0.439999998	271.61496
0.449999988	305.538086
0.459999979	238.484009
0.469999999	286.024994
0.479999989	286.82666
0.48999998	276.523254
0.5	287.007965
0.50999999	293.311218
0.519999981	283.737549
0.529999971	283.180237
0.539999962	284.770477
0.550000012	285.461731
0.560000002	279.662903
0.569999993	282.507568
0.579999983	282.087097
0.589999974	281.107025
0.599999964	284.495148
0.610000014	284.452271
0.620000005	282.032593
0.629999995	282.46814
0.639999986	282.606659
0.649999976	278.620056
0.659999967	280.284149
0.670000017	282.414764
0.680000007	280.21698
0.689999998	282.510468
0.699999988	282.342621
0.709999979	280.017822
0.719999969	284.491669
0.730000019	285.512054
0.74000001	285.823486
0.75	280.229431
0.75999999	280.625031
0.769999981	285.317963
0.779999971	277.621216
0.789999962	284.645782
0.800000012	281.143524
0.810000002	282.349487
0.819999993	279.912018
0.829999983	280.409607
0.839999974	283.683838
0.849999964	282.522247
0.860000014	283.713074
0.870000005	282.599304
0.879999995	283.037628
0.889999986	285.479004
0.899999976	283.265808
0.909999967	281.407043
0.920000017	286.020447
0.930000007	283.662415
0.939999998	278.700134
0.949999988	283.25415
0.959999979	285.129761
0.969999969	281.911133
0.980000019	286.669922
0.99000001	283.190155
1	286.806885
1.00999999	283.407166
1.01999998	284.888397
1.02999997	286.497284
1.03999996	292.420319
1.04999995	283.607147
1.05999994	286.948608
1.06999993	285.984894
1.08000004	283.471252
1.09000003	281.336792
1.10000002	285.466736
1.11000001	290.80127
1.12	273.603455
1.13	287.046814
1.13999999	287.158875
1.14999998	281.201782
1.15999997	282.671631
1.16999996	292.789551
1.17999995	276.457428
1.18999994	286.086761
1.20000005	280.1427
1.21000004	280.35318
1.22000003	277.723206
1.23000002	284.106506
1.24000001	285.013519
1.25	292.391541
1.25999999	306.314453
1.26999998	306.735596
1.27999997	331.302155
1.28999996	329.329468
1.29999995	339.243011
1.30999994	359.39151
1.31999993	362.502289
1.33000004	373.421936
1.34000003	384.724731
1.35000002	404.60379
1.36000001	418.867615
1.37	398.827728
1.38	497.837708
1.38999999	472.053101
1.39999998	480.603943
1.40999997	501.251953
1.41999996	513.313477
1.42999995	487.557159
1.43999994	514.590088
1.45000005	549.488647
1.46000004	551.366089
1.47000003	552.887939
1.48000002	553.25238
1.49000001	555.06488
1.5	553.934265
1.50999999	554.707764
1.51999998	554.531311
1.52999997	555.592896
1.53999996	553.289795
1.54999995	557.06897
1.55999994	555.922546
1.56999993	557.184326
1.58000004	553.400085
1.59000003	556.377808
1.60000002	555.299438
1.61000001	555.555176
1.62	559.968201
1.63	552.997437
1.63999999	558.132935
1.64999998	551.906128
1.65999997	553.001587
1.66999996	560.854248
1.67999995	555.10376
1.68999994	550.456543
1.70000005	559.621277
1.71000004	555.514709
1.72000003	549.822083
1.73000002	554.310181
1.74000001	559.575806
1.75	549.972046
1.75999999	554.268616
1.76999998	553.647522
1.77999997	554.280396
1.78999996	559.120483
1.79999995	555.142456
1.80999994	554.059326
1.81999993	554.095886
1.83000004	553.164062
1.84000003	553.170166
1.85000002	553.918091
1.86000001	554.352905
1.87	553.57019
1.88	553.6698
1.88999999	553.62793
1.89999998	554.078552
1.90999997	553.722778
1.91999996	553.878906
1.92999995	554.588379
1.93999994	553.803162
1.95000005	554.116821
1.96000004	554.184692
1.97000003	554.187256
1.98000002	554.109741
1.99000001	554.410767
2	555.082642
2.00999999	554.761841
2.01999998	556.723694
2.02999997	554.695557
2.03999996	554.334412
2.04999995	554.248962
2.05999994	555.133911
2.06999993	555.984192
2.07999992	554.981079
2.08999991	555.218018
2.0999999	554.030151
2.1099999	558.146362
2.11999989	553.540527
2.12999988	556.048584
2.1400001	393.92923
2.1500001	209.685883
2.16000009	517.939148
2.17000008	505.870148
2.18000007	519.417786
2.19000006	511.441711
2.20000005	459.553589
2.21000004	478.69223
2.22000003	488.119629
2.23000002	500.3479
2.24000001	548.152283
2.25	540.467102
2.25999999	444.566101
2.26999998	453.917053
2.27999997	469.336548
2.28999996	457.15152
2.29999995	449.781372
2.30999994	436.935242
2.31999993	417.024567
2.32999992	402.166931
2.33999991	356.01358
2.3499999	333.309937
2.3599999	165.493561
2.36999989	297.876953
2.37999988	226.195328
2.3900001	175.06517
2.4000001	137.765793
2.41000009	26.4079247
2.42000008	69.9912415
2.43000007	49.3365784
2.44000006	55.8750954
2.45000005	43.8652306
2.46000004	48.7868156
2.47000003	38.0637589
2.48000002	308.353119
2.49000001	141.652069
2.5	36.6832466
2.50999999	-10.4051504
2.51999998	-10.9486303
2.52999997	-10.9923782
2.53999996	-10.9750519
2.54999995	-10.924489
2.55999994	-10.910265
2.56999993	-10.8819399
2.57999992	-10.816618
2.58999991	-10.8644085
2.5999999	-10.699954
2.6099999	-10.6880741
2.61999989	-10.5418987
2.62999988	-10.3297987
2.6400001	-10.1799335
2.6500001	-10.1645689
2.66000009	-9.86526489
2.67000008	-9.72641277
2.68000007	-9.66248322
2.69000006	-9.44976997
2.70000005	-9.26771927
2.71000004	-9.13392735
2.72000003	-9.01339149
2.73000002	-8.82801628
2.74000001	-8.75340462
2.75	-8.8144722
2.75999999	-8.73394299
2.76999998	-8.55347824
2.77999997	-8.49379444
2.78999996	-9.00818539
2.79999995	-8.37899113
2.80999994	-8.8374548
2.81999993	-8.83342648
2.82999992	-8.94445705
2.83999991	-9.22652435
2.8499999	-9.52716255
2.8599999	-9.50338745
2.86999989	-9.20530415
2.87999988	-8.94730282
2.8900001	-8.70851231
2.9000001	-8.48221111
2.91000009	-8.33960247
2.92000008	-8.24547005
2.93000007	-8.21616936
2.94000006	-8.21469784
2.95000005	-8.25527191
2.96000004	-8.33669662
2.97000003	-8.43325424
2.98000002	-8.5724678
2.99000001	-8.61318111
3	-8.9511528
3.00999999	-9.13548946
3.01999998	-9.30845451
3.02999997	-9.52244377
3.03999996	-9.65173149
3.04999995	-9.91556263
3.05999994	-10.1321297
3.06999993	-10.2946177
3.07999992	-10.4954033
3.08999991	-10.5825548
3.0999999	-10.7556353
3.1099999	-10.8338289
3.11999989	-11.2069416
3.12999988	357.458618
3.1400001	580.309875
3.1500001	-14.3517685
3.16000009	-1.8221159
3.17000008	24.259201
3.18000007	80.7365036
3.19000006	111.612061
3.20000005	94.8009262
3.21000004	75.8529129
3.22000003	67.4682159
3.23000002	54.8638992
3.24000001	52.7890549
3.25	-10.3562822
3.25999999	-8.94953346
3.26999998	-9.23943329
3.27999997	-9.19468117
3.28999996	-9.16107178
3.29999995	50.6028824
3.30999994	89.1827087
3.31999993	120.499962
3.32999992	185.769699
3.33999991	208.392731
3.3499999	235.985977
3.3599999	443.075531
3.36999989	231.594254
3.37999988	270.146759
3.3900001	327.759918
3.4000001	365.393036
3.41000009	416.329773
3.42000008	471.858307
3.43000007	512.344543
3.44000006	521.698975
3.45000005	158.188187
3.46000004	319.611969
3.47000003	451.133728
3.48000002	531.029785
3.49000001	552.263184
3.5	555.14801
3.50999999	551.592834
3.51999998	551.164429
3.52999997	553.357605
3.53999996	557.259094
3.54999995	557.451294
3.55999994	555.711792
3.56999993	557.543213
3.57999992	556.841553
3.58999991	556.601318
3.5999999	556.447754
3.6099999	558.307495
3.61999989	556.397339
3.62999988	554.425049
3.6400001	557.655029
3.6500001	555.365723
3.66000009	557.106689
3.67000008	556.426025
3.68000007	555.557922
3.69000006	556.307129
3.70000005	555.942505
3.71000004	557.144836
3.72000003	556.711609
3.73000002	555.668213
3.74000001	555.692871
3.75	555.580627
3.75999999	554.848999
3.76999998	557.032349
3.77999997	557.4104
3.78999996	556.077759
3.79999995	555.184387
3.80999994	556.669922
3.81999993	556.599365
3.82999992	556.274536
3.83999991	556.846924
3.8499999	556.548462
3.8599999	556.662964
3.86999989	557.199707
3.87999988	556.214966
3.8900001	555.626587
3.9000001	555.859009
3.91000009	555.355225
3.92000008	555.430176
3.93000007	555.125977
3.94000006	555.250854
3.95000005	554.859863
3.96000004	554.616089
3.97000003	555.543457
3.98000002	555.020752
3.99000001	554.947693
4	554.842285
4.01000023	555.669556
4.02000046	555.430298
4.03000021	555.164429
4.04000044	555.45874
4.05000019	555.083618
4.06000042	556.653015
4.07000017	559.134766
4.0800004	555.367615
4.09000015	557.351929
4.10000038	557.096436
4.11000013	502.613525
4.12000036	210.018829
4.13000011	471.403839
4.14000034	473.765381
4.1500001	449.262817
4.16000032	425.158539
4.17000008	423.950653
4.18000031	433.337097
4.19000006	447.064087
4.20000029	455.203247
4.21000004	423.766327
4.22000027	414.3284
4.23000002	492.57489
4.24000025	463.444855
4.25	437.786316
4.26000023	430.101044
4.27000046	439.345459
4.28000021	450.289856
4.29000044	454.097717
4.30000019	462.421753
4.31000042	466.831787
4.32000017	532.109619
4.3300004	540.860229
4.34000015	435.530457
4.35000038	442.583313
4.36000013	317.504059
4.37000036	469.685333
4.38000011	416.340973
4.39000034	356.713074
4.4000001	283.749115
4.41000032	223.153778
4.42000008	165.413742
4.43000031	81.5240707
4.44000006	60.015995
4.45000029	59.243103
4.46000004	44.7383881
4.47000027	29.9847336
4.48000002	431.884979
4.49000025	105.669739
4.5	22.1217556
4.51000023	-10.4924116
4.52000046	-10.9313774
4.53000021	-10.9849415
4.54000044	-10.9033585
4.55000019	-10.9481859
4.56000042	-11.0218964
4.57000017	-10.9577122
4.5800004	-10.8048563
4.59000015	-10.8202515
4.60000038	-10.766367
4.61000013	-10.6278725
4.62000036	-10.4755363
4.63000011	-10.3360548
4.64000034	-10.2541456
4.6500001	-10.0722609
4.66000032	-9.88860321
4.67000008	-9.73326015
4.68000031	-9.58351326
4.69000006	-9.43686295
4.70000029	-9.24541664
4.71000004	-9.07067394
4.72000027	-9.11506176
4.73000002	-8.94460106
4.74000025	-8.77989388
4.75	-8.61526871
4.76000023	-8.61203575
4.77000046	-8.4454422
4.78000021	-8.95559502
4.79000044	-8.34253693
4.80000019	-8.82606888
4.81000042	-8.62149715
4.82000017	-8.70992947
4.8300004	-9.02667809
4.84000015	-9.27255154
4.85000038	-9.68441391
4.86000013	-9.49572182
4.87000036	-9.21832085
4.88000011	-8.93296051
4.89000034	-8.68008614
4.9000001	-8.47465515
4.91000032	-8.36609745
4.92000008	-8.24416351
4.93000031	-8.20101547
4.94000006	-8.21439075
4.95000029	-8.27211094
4.96000004	-8.3281641
4.97000027	-8.44894218
4.98000002	-8.51764202
4.99000025	-8.76444244
5	-8.78650093
5.01000023	-9.10795212
5.02000046	-9.31228447
5.03000021	-9.50171185
5.04000044	-9.70965195
5.05000019	-9.85429287
5.06000042	-10.1315422
5.07000017	-10.300209
5.0800004	-10.4876099
5.09000015	-10.8346386
5.10000038	-10.6901283
5.11000013	-10.8774672
5.12000036	339.322723
5.13000011	640.136047
5.14000034	-14.4553967
5.1500001	-2.69367552
5.16000032	1.82086754
5.17000008	2.03614736
5.18000031	183.387146
5.19000006	196.313446
5.20000029	117.725166
5.21000004	91.1187286
5.22000027	99.9640427
5.23000002	153.969711
5.24000025	59.1238632
5.25	38.2807236
5.26000023	27.4178352
5.27000046	-8.86928749
5.28000021	-9.13746548
5.29000044	-9.19912243
5.30000019	-9.28467846
5.31000042	70.1014404
5.32000017	86.1977081
5.3300004	117.354065
5.34000015	173.987213
5.35000038	186.306747
5.36000013	337.273804
5.37000036	211.079651
5.38000011	228.631439
5.39000034	288.882904
5.4000001	329.593842
5.41000032	375.111603
5.42000008	442.133972
5.43000031	494.814209
5.44000006	514.779053
5.45000029	513.573914
5.46000004	512.585083
5.47000027	167.178513
5.48000002	348.031647
5.49000025	471.660645
5.5	537.045044
5.51000023	555.89679
5.52000046	554.097778
5.53000021	555.487793
5.54000044	557.299561
5.55000019	558.2276
5.56000042	557.753967
5.57000017	555.262512
5.5800004	557.611023
5.59000015	555.858765
5.60000038	555.348022
5.61000013	557.843262
5.62000036	555.106262
5.63000011	555.812378
5.64000034	556.060181
5.6500001	593.940552
5.66000032	580.986938
5.67000008	553.694214
