# Supplementary material for: Universal Walking Control Framework of Biped Robot Based on Dynamic Model and Quadratic Programming
Source: Hindawi journal article supplement (doi:10.1155/2020/2789039), 2020-10-31
Supplement: f1 [file 2789039.f1.zip › Position control/FT z right]

0.00999999978	0.000414332579
0.0199999996	-16.6420536
0.0299999993	12.4949245
0.0399999991	765.115479
0.049999997	542.668457
0.0600000024	311.634399
0.0700000003	289.561127
0.0799999982	288.153992
0.0899999961	288.641479
0.100000001	290.283478
0.109999999	295.670898
0.119999997	293.272949
0.129999995	292.07135
0.140000001	297.693726
0.150000006	292.532898
0.160000011	290.774536
0.170000002	286.635193
0.180000007	285.368042
0.190000013	284.503967
0.200000003	282.904266
0.210000008	279.606476
0.219999999	280.167053
0.230000004	278.876495
0.24000001	279.91925
0.25	279.13443
0.25999999	276.946381
0.269999981	278.156769
0.280000001	277.249146
0.289999992	276.940979
0.299999982	277.205292
0.310000002	276.691254
0.319999993	277.57196
0.329999983	278.010773
0.340000004	374.537231
0.349999994	164.482727
0.359999985	511.228943
0.370000005	238.330139
0.379999995	345.891907
0.389999986	301.642792
0.399999976	301.18927
0.409999996	312.16748
0.419999987	299.512512
0.429999977	295.099792
0.439999998	295.433441
0.449999988	261.910919
0.459999979	331.05188
0.469999999	282.779785
0.479999989	281.234558
0.48999998	292.132812
0.5	281.263428
0.50999999	276.552002
0.519999981	284.478333
0.529999971	285.066101
0.539999962	283.136322
0.550000012	282.167847
0.560000002	288.203979
0.569999993	285.478546
0.579999983	285.772278
0.589999974	286.709717
0.599999964	283.013977
0.610000014	283.151672
0.620000005	285.326294
0.629999995	285.093414
0.639999986	284.753021
0.649999976	289.044525
0.659999967	287.482117
0.670000017	285.293976
0.680000007	287.283997
0.689999998	285.056335
0.699999988	284.919952
0.709999979	287.425293
0.719999969	282.82901
0.730000019	281.565369
0.74000001	281.541931
0.75	286.861755
0.75999999	286.622498
0.769999981	281.9953
0.779999971	290.257324
0.789999962	282.699615
0.800000012	286.479675
0.810000002	284.857849
0.819999993	287.528503
0.829999983	286.829773
0.839999974	283.744965
0.849999964	285.037628
0.860000014	283.6922
0.870000005	284.690063
0.879999995	284.342926
0.889999986	282.021881
0.899999976	284.189697
0.909999967	286.280945
0.920000017	281.39798
0.930000007	283.737976
0.939999998	289.121887
0.949999988	284.180115
0.959999979	282.51651
0.969999969	285.803284
0.980000019	280.544525
0.99000001	284.173553
1	281.00177
1.00999999	284.214294
1.01999998	282.790619
1.02999997	281.5
1.03999996	275.099304
1.04999995	284.206512
1.05999994	281.401062
1.06999993	281.762878
1.08000004	284.587341
1.09000003	283.62561
1.10000002	279.993561
1.11000001	271.426025
1.12	288.251587
1.13	275.535492
1.13999999	271.8396
1.14999998	280.687012
1.15999997	276.410431
1.16999996	269.242554
1.17999995	284.867889
1.18999994	274.220337
1.20000005	278.977814
1.21000004	278.403656
1.22000003	281.448853
1.23000002	273.39682
1.24000001	272.796967
1.25	265.238342
1.25999999	251.972595
1.26999998	253.82724
1.27999997	226.883102
1.28999996	228.12796
1.29999995	218.045029
1.30999994	202.359268
1.31999993	197.20192
1.33000004	183.065948
1.34000003	166.306824
1.35000002	145.612534
1.36000001	127.660057
1.37	115.547028
1.38	94.4298782
1.38999999	74.6601257
1.39999998	65.0598984
1.40999997	45.4548874
1.41999996	32.644886
1.42999995	53.7837524
1.43999994	22.7902298
1.45000005	-10.0587444
1.46000004	-10.35217
1.47000003	-10.5632029
1.48000002	-10.7243214
1.49000001	-10.8637161
1.5	-10.9293804
1.50999999	-10.9858866
1.51999998	-10.9909515
1.52999997	-10.9771481
1.53999996	-10.9035378
1.54999995	-10.9143333
1.55999994	-10.8125153
1.56999993	-10.5587368
1.58000004	-10.6193523
1.59000003	-10.4657383
1.60000002	-10.3033638
1.61000001	-10.3386927
1.62	-10.0502443
1.63	-9.63760948
1.63999999	-9.94566059
1.64999998	-9.24787235
1.65999997	-9.5580616
1.66999996	-9.177701
1.67999995	-9.14699745
1.68999994	-8.83726692
1.70000005	-8.90693092
1.71000004	-8.77257061
1.72000003	-8.60029793
1.73000002	-8.5831461
1.74000001	-8.61200237
1.75	-8.55784702
1.75999999	-8.5941906
1.76999998	-8.67283058
1.77999997	-8.71430397
1.78999996	-8.892869
1.79999995	-9.06994343
1.80999994	-9.22992229
1.81999993	-9.48538208
1.83000004	-9.52986622
1.84000003	-9.34202862
1.85000002	-9.11441803
1.86000001	-8.92142773
1.87	-8.74509335
1.88	-8.62485409
1.88999999	-8.51781273
1.89999998	-8.47538567
1.90999997	-8.44328594
1.91999996	-8.45492458
1.92999995	-8.50050259
1.93999994	-8.52420425
1.95000005	-8.63011551
1.96000004	-8.71796608
1.97000003	-8.77606297
1.98000002	-8.99377632
1.99000001	-9.12521553
2	-9.2712574
2.00999999	-9.43210697
2.01999998	-9.63117599
2.02999997	-9.74996376
2.03999996	-9.90435219
2.04999995	-10.0714073
2.05999994	-10.2272797
2.06999993	-10.3955307
2.07999992	-10.494626
2.08999991	-10.6150627
2.0999999	-10.8724689
2.1099999	-10.8457289
2.11999989	-10.8127642
2.12999988	-11.0004807
2.1400001	227.760437
2.1500001	443.582825
2.16000009	19.2448978
2.17000008	22.2341652
2.18000007	-8.53831005
2.19000006	-8.10903263
2.20000005	86.3646393
2.21000004	83.4321823
2.22000003	75.4094391
2.23000002	57.6064415
2.24000001	-9.39237404
2.25	-8.92054749
2.25999999	104.917343
2.26999998	109.016426
2.27999997	100.145081
2.28999996	100.544479
2.29999995	106.012939
2.30999994	116.285667
2.31999993	139.340775
2.32999992	164.495316
2.33999991	210.085068
2.3499999	241.196198
2.3599999	371.765961
2.36999989	288.092529
2.37999988	344.499542
2.3900001	398.545319
2.4000001	431.084351
2.41000009	530.681458
2.42000008	490.816406
2.43000007	499.894653
2.44000006	497.003662
2.45000005	511.040894
2.46000004	502.776978
2.47000003	514.879578
2.48000002	282.902771
2.49000001	383.590271
2.5	483.979614
2.50999999	546.141357
2.51999998	556.961792
2.52999997	556.795837
2.53999996	556.695068
2.54999995	555.348633
2.55999994	551.820557
2.56999993	554.828125
2.57999992	553.703369
2.58999991	555.093445
2.5999999	554.588806
2.6099999	554.637939
2.61999989	556.53717
2.62999988	554.104431
2.6400001	554.20752
2.6500001	557.351868
2.66000009	555.361816
2.67000008	556.308105
2.68000007	557.24585
2.69000006	556.188965
2.70000005	556.205444
2.71000004	556.062195
2.72000003	556.73645
2.73000002	554.976257
2.74000001	555.685791
2.75	554.23938
2.75999999	557.495178
2.76999998	555.06366
2.77999997	554.963806
2.78999996	556.914062
2.79999995	553.354187
2.80999994	553.783508
2.81999993	557.287231
2.82999992	554.05249
2.83999991	553.646729
2.8499999	555.098022
2.8599999	555.313049
2.86999989	555.754944
2.87999988	555.512451
2.8900001	555.890869
2.9000001	555.030151
2.91000009	555.486938
2.92000008	554.65271
2.93000007	554.565674
2.94000006	554.598022
2.95000005	554.43634
2.96000004	554.426392
2.97000003	554.236938
2.98000002	554.75293
2.99000001	554.509277
3	554.827637
3.00999999	555.137268
3.01999998	555.131226
3.02999997	555.808105
3.03999996	554.600525
3.04999995	556.11377
3.05999994	555.800537
3.06999993	556.149597
3.07999992	557.002075
3.08999991	555.613892
3.0999999	556.857117
3.1099999	556.090393
3.11999989	557.237305
3.12999988	324.917572
3.1400001	126.392647
3.1500001	488.25589
3.16000009	502.65271
3.17000008	491.305359
3.18000007	452.785248
3.19000006	450.677338
3.20000005	463.941223
3.21000004	480.340515
3.22000003	493.536102
3.23000002	496.14859
3.24000001	503.403198
3.25	530.831543
3.25999999	536.88446
3.26999998	537.257568
3.27999997	547.63501
3.28999996	547.946045
3.29999995	511.644958
3.30999994	476.872833
3.31999993	445.163879
3.32999992	396.244751
3.33999991	372.316467
3.3499999	336.559937
3.3599999	61.4968872
3.36999989	382.906799
3.37999988	310.150024
3.3900001	250.184845
3.4000001	215.993546
3.41000009	155.449707
3.42000008	98.8094788
3.43000007	52.475071
3.44000006	35.0720329
3.45000005	503.102875
3.46000004	146.767426
3.47000003	55.8607712
3.48000002	-9.96314144
3.49000001	-10.7823257
3.5	-10.837121
3.50999999	-10.7602043
3.51999998	-10.7750673
3.52999997	-10.8620501
3.53999996	-10.90061
3.54999995	-10.8201532
3.55999994	-10.7295485
3.56999993	-10.7666168
3.57999992	-10.6849899
3.58999991	-10.5862427
3.5999999	-10.4762583
3.6099999	-10.3098345
3.61999989	-10.1310863
3.62999988	-9.93860626
3.6400001	-9.87509918
3.6500001	-9.66179276
3.66000009	-9.6066761
3.67000008	-9.44420815
3.68000007	-9.30482578
3.69000006	-9.17960835
3.70000005	-9.05356407
3.71000004	-8.96567631
3.72000003	-8.82880402
3.73000002	-8.71678352
3.74000001	-8.6659584
3.75	-8.5908432
3.75999999	-8.94775105
3.76999998	-8.62260723
3.77999997	-8.65368938
3.78999996	-8.72270298
3.79999995	-8.81591415
3.80999994	-8.93688202
3.81999993	-9.30399227
3.82999992	-9.60583019
3.83999991	-9.65206909
3.8499999	-9.42284107
3.8599999	-9.15078354
3.86999989	-8.88783646
3.87999988	-8.70998764
3.8900001	-8.54838276
3.9000001	-8.4437027
3.91000009	-8.36575222
3.92000008	-8.33207703
3.93000007	-8.34545422
3.94000006	-8.37964535
3.95000005	-8.44588089
3.96000004	-8.52747917
3.97000003	-8.69520569
3.98000002	-8.77968979
3.99000001	-8.93969536
4	-9.1133213
4.01000023	-9.30685043
4.02000046	-9.48041344
4.03000021	-9.5526638
4.04000044	-9.93087196
4.05000019	-10.0153351
4.06000042	-10.2074118
4.07000017	-10.4339581
4.0800004	-10.4441948
4.09000015	-10.6195965
4.10000038	-10.7758722
4.11000013	76.3720245
4.12000036	515.002563
4.13000011	37.7793846
4.14000034	48.310997
4.1500001	92.2881699
4.16000032	140.517883
4.17000008	152.046005
4.18000031	134.334961
4.19000006	114.938721
4.20000029	96.4391327
4.21000004	115.863876
4.22000027	134.130386
4.23000002	32.0586739
4.24000025	47.8922691
4.25	85.2823868
4.26000023	122.001358
4.27000046	127.826462
4.28000021	121.565399
4.29000044	112.175224
4.30000019	99.0151062
4.31000042	92.0169296
4.32000017	-8.32789612
4.3300004	-8.98654652
4.34000015	162.073853
4.35000038	139.877594
4.36000013	187.422791
4.37000036	134.749176
4.38000011	146.833511
4.39000034	197.749405
4.4000001	276.615204
4.41000032	363.771393
4.42000008	408.379944
4.43000031	482.430298
4.44000006	512.476379
4.45000029	503.097443
4.46000004	512.170776
4.47000027	530.612061
4.48000002	187.983459
4.49000025	375.432434
4.5	501.588257
4.51000023	548.434326
4.52000046	561.807861
4.53000021	558.852417
4.54000044	553.729187
4.55000019	555.217407
4.56000042	556.70874
4.57000017	555.589233
4.5800004	556.351074
4.59000015	555.333313
4.60000038	555.838318
4.61000013	555.92981
4.62000036	555.813354
4.63000011	555.834839
4.64000034	556.257385
4.6500001	557.758179
4.66000032	556.368774
4.67000008	555.703247
4.68000031	555.366577
4.69000006	556.84729
4.70000029	556.30304
4.71000004	555.033203
4.72000027	554.941345
4.73000002	555.43219
4.74000025	556.096985
4.75	554.412842
4.76000023	555.703979
4.77000046	554.157715
4.78000021	559.32428
4.79000044	554.983521
4.80000019	557.596191
4.81000042	554.810547
4.82000017	556.981384
4.8300004	554.851929
4.84000015	556.329346
4.85000038	555.997742
4.86000013	557.045166
4.87000036	556.498169
4.88000011	557.145996
4.89000034	556.635498
4.9000001	556.15332
4.91000032	555.542969
4.92000008	555.119385
4.93000031	555.098755
4.94000006	555.159668
4.95000029	555.367188
4.96000004	554.892578
4.97000027	555.568237
4.98000002	554.579773
4.99000025	556.085999
5	554.7005
5.01000023	555.297791
5.02000046	555.954346
5.03000021	556.204956
5.04000044	556.451599
5.05000019	554.783997
5.06000042	557.527344
5.07000017	557.932495
5.0800004	555.377075
5.09000015	559.276917
5.10000038	555.740051
5.11000013	556.793457
5.12000036	339.705841
5.13000011	117.455986
5.14000034	446.250977
5.1500001	502.342285
5.16000032	515.352539
5.17000008	499.78772
5.18000031	382.363556
5.19000006	394.437317
5.20000029	459.479675
5.21000004	470.074921
5.22000027	447.218872
5.23000002	396.506256
5.24000025	469.049316
5.25	501.266357
5.26000023	515.244019
5.27000046	543.750916
5.28000021	545.750732
5.29000044	548.433105
5.30000019	553.033752
5.31000042	501.654053
5.32000017	480.570129
5.3300004	448.678711
5.34000015	407.521942
5.35000038	388.317017
5.36000013	157.856033
5.37000036	417.967194
5.38000011	345.207672
5.39000034	291.371124
5.4000001	240.665253
5.41000032	200.190643
5.42000008	131.320114
5.43000031	61.6495476
5.44000006	46.4084206
5.45000029	41.7322044
5.46000004	39.1205673
5.47000027	485.187744
5.48000002	128.878677
5.49000025	37.6272583
5.5	-10.1936789
5.51000023	-10.8927269
5.52000046	-10.936264
5.53000021	-10.9481964
5.54000044	-10.9603977
5.55000019	-11.0048141
5.56000042	-10.9442825
5.57000017	-10.8948746
5.5800004	-10.8962231
5.59000015	-10.7793007
5.60000038	-10.6583261
5.61000013	-10.5211716
5.62000036	-10.3178787
5.63000011	-10.277112
5.64000034	-10.1030226
5.6500001	-0.216026545
5.66000032	-8.4725666
5.67000008	-9.00439835
