# Supplementary material for: Universal Walking Control Framework of Biped Robot Based on Dynamic Model and Quadratic Programming
Source: Hindawi journal article supplement (doi:10.1155/2020/2789039), 2020-10-31
Supplement: f1 [file 2789039.f1.zip › Position control/Xzmp]

0.00999999978	-0.0030889779
0.0199999996	-0.001612849
0.0299999993	-0.000337069097
0.0399999991	-0.009099808
0.049999997	-0.002787427
0.0600000024	-0.003483345
0.0700000003	-0.001219406
0.0799999982	-0.0095140672
0.0899999961	-0.0854768679
0.100000001	-0.07016626
0.109999999	-0.0477028117
0.119999997	-0.0344698653
0.129999995	-0.0213722382
0.140000001	-0.00575507199
0.150000006	-0.00161601452
0.160000011	-0.00223587826
0.170000002	-0.00421624584
0.180000007	-0.00792000629
0.190000013	-0.0104235793
0.200000003	-0.0135864895
0.210000008	-0.0186618697
0.219999999	-0.0221445858
0.230000004	-0.0262434259
0.24000001	-0.0294500012
0.25	-0.0314714983
0.25999999	-0.0343796611
0.269999981	-0.0386337303
0.280000001	-0.0412168987
0.289999992	-0.0437180325
0.299999982	-0.0447269529
0.310000002	-0.0466918424
0.319999993	-0.0478229709
0.329999983	-0.0501218401
0.340000004	0.0618649311
0.349999994	0.0400454849
0.359999985	-0.0587472171
0.370000005	-0.0882680863
0.379999995	-0.0731829479
0.389999986	-0.071971789
0.399999976	-0.066463165
0.409999996	-0.0645085275
0.419999987	-0.0622473285
0.429999977	-0.0575830527
0.439999998	-0.0574481674
0.449999988	-0.0625729635
0.459999979	-0.0593476258
0.469999999	-0.0632439777
0.479999989	-0.0623866096
0.48999998	-0.0617395081
0.5	-0.0604500063
0.50999999	-0.0697533861
0.519999981	-0.0659870878
0.529999971	-0.0631339699
0.539999962	-0.057766255
0.550000012	-0.0568712875
0.560000002	-0.0577291548
0.569999993	-0.0563660227
0.579999983	-0.0591964126
0.589999974	-0.0586123616
0.599999964	-0.0589626394
0.610000014	-0.0580703206
0.620000005	-0.053390108
0.629999995	-0.0534921288
0.639999986	-0.0555534586
0.649999976	-0.0552092902
0.659999967	-0.0572149381
0.670000017	-0.0587238073
0.680000007	-0.0567134842
0.689999998	-0.0554983802
0.699999988	-0.0566850156
0.709999979	-0.0546827503
0.719999969	-0.0549007095
0.730000019	-0.0563180856
0.74000001	-0.0537826158
0.75	-0.0528516844
0.75999999	-0.0541918054
0.769999981	-0.054566931
0.779999971	-0.0572737157
0.789999962	-0.056416709
0.800000012	-0.0541911013
0.810000002	-0.0548263229
0.819999993	-0.0551912561
0.829999983	-0.05635003
0.839999974	-0.0536911972
0.849999964	-0.0528559759
0.860000014	-0.0553762317
0.870000005	-0.0558746755
0.879999995	-0.0565559641
0.889999986	-0.05569553
0.899999976	-0.0546524189
0.909999967	-0.0516919084
0.920000017	-0.0534245819
0.930000007	-0.0564200357
0.939999998	-0.0547414795
0.949999988	-0.0557434149
0.959999979	-0.055570785
0.969999969	-0.0545606241
0.980000019	-0.0547055863
0.99000001	-0.0547249988
1	-0.0552692562
1.00999999	-0.0548899062
1.01999998	-0.0546198748
1.02999997	-0.0532073714
1.03999996	-0.0544451661
1.04999995	-0.0547814444
1.05999994	-0.0541458093
1.06999993	-0.0555868037
1.08000004	-0.0551029257
1.09000003	-0.0537945628
1.10000002	-0.0538745709
1.11000001	-0.0556621924
1.12	-0.0533496104
1.13	-0.0543793477
1.13999999	-0.0549134873
1.14999998	-0.0571607351
1.15999997	-0.0536761358
1.16999996	-0.0581842214
1.17999995	-0.0565904677
1.18999994	-0.0525475442
1.20000005	-0.0535139479
1.21000004	-0.0545782857
1.22000003	-0.0529616065
1.23000002	-0.0557626411
1.24000001	-0.0561037473
1.25	-0.0554728247
1.25999999	-0.0574878231
1.26999998	-0.0563706048
1.27999997	-0.0580873489
1.28999996	-0.0564870872
1.29999995	-0.0640446246
1.30999994	-0.0594506674
1.31999993	-0.0550863445
1.33000004	-0.054307282
1.34000003	-0.0493871234
1.35000002	-0.0507497266
1.36000001	-0.0523273833
1.37	-0.0820545182
1.38	-0.0538276955
1.38999999	-0.0537074879
1.39999998	-0.0542751811
1.40999997	-0.0546226799
1.41999996	-0.0542638153
1.42999995	-0.0498914793
1.43999994	-0.0529663935
1.45000005	-0.0531563461
1.46000004	-0.0506337322
1.47000003	-0.0483209528
1.48000002	-0.0465456545
1.49000001	-0.0430021174
1.5	-0.041251909
1.50999999	-0.0388843119
1.51999998	-0.0378949717
1.52999997	-0.0356687196
1.53999996	-0.0237362087
1.54999995	-0.0365503132
1.55999994	-0.0347530916
1.56999993	-0.0310915168
1.58000004	-0.01474931
1.59000003	-0.0175567102
1.60000002	-0.0211658292
1.61000001	-0.0328927375
1.62	-0.0398250781
1.63	-0.0232206024
1.63999999	-0.0431626514
1.64999998	-0.0265087243
1.65999997	-0.034193527
1.66999996	-0.0573424362
1.67999995	-0.0460693575
1.68999994	-0.0408292748
1.70000005	-0.0495180227
1.71000004	-0.0468836986
1.72000003	-0.0376150087
1.73000002	-0.0424367115
1.74000001	-0.0582790487
1.75	-0.0552392527
1.75999999	-0.056387011
1.76999998	-0.0471264161
1.77999997	-0.0611934289
1.78999996	-0.0751327723
1.79999995	-0.0730754882
1.80999994	-0.0691918358
1.81999993	-0.0678755045
1.83000004	-0.0648206025
1.84000003	-0.06437736
1.85000002	-0.0646902099
1.86000001	-0.0640516207
1.87	-0.0650737956
1.88	-0.0656162947
1.88999999	-0.0660318509
1.89999998	-0.0667207614
1.90999997	-0.0668818653
1.91999996	-0.066476509
1.92999995	-0.0683392137
1.93999994	-0.0677128285
1.95000005	-0.0681155697
1.96000004	-0.0671491176
1.97000003	-0.0633844584
1.98000002	-0.0646574721
1.99000001	-0.0656839907
2	-0.0671490729
2.00999999	-0.0659712031
2.01999998	-0.0640446022
2.02999997	-0.0626300499
2.03999996	-0.0615054034
2.04999995	-0.0591530651
2.05999994	-0.0563407019
2.06999993	-0.0537858792
2.07999992	-0.05244302
2.08999991	-0.0512803681
2.0999999	-0.0518547967
2.1099999	-0.0459694676
2.11999989	-0.0449557528
2.12999988	-0.0257827435
2.1400001	0.0258554425
2.1500001	0.0466916896
2.16000009	-0.0471217707
2.17000008	-0.02858188
2.18000007	-0.0491923913
2.19000006	-0.0538779646
2.20000005	-0.018769918
2.21000004	-0.0282261297
2.22000003	-0.0445919707
2.23000002	-0.0275886692
2.24000001	-0.0749217048
2.25	-0.0671362951
2.25999999	-0.0192143731
2.26999998	-0.0295310933
2.27999997	-0.0127351983
2.28999996	-0.00840478297
2.29999995	-0.0125142261
2.30999994	-0.00559160812
2.31999993	0.0010304004
2.32999992	-0.00765451835
2.33999991	0.0372119024
2.3499999	0.0332571976
2.3599999	0.0918033272
2.36999989	0.0591983125
2.37999988	0.0872521773
2.3900001	0.104015164
2.4000001	0.10350658
2.41000009	0.144942701
2.42000008	0.133792162
2.43000007	0.131997794
2.44000006	0.135679647
2.45000005	0.145060867
2.46000004	0.142709717
2.47000003	0.146504894
2.48000002	0.122092612
2.49000001	0.145158738
2.5	0.164071113
2.50999999	0.167842731
2.51999998	0.171137959
2.52999997	0.176211879
2.53999996	0.181067199
2.54999995	0.188996613
2.55999994	0.191852316
2.56999993	0.19675079
2.57999992	0.197255403
2.58999991	0.202491596
2.5999999	0.204841971
2.6099999	0.203504175
2.61999989	0.209205464
2.62999988	0.202398777
2.6400001	0.195349798
2.6500001	0.199073613
2.66000009	0.192393258
2.67000008	0.189233065
2.68000007	0.188050881
2.69000006	0.185296357
2.70000005	0.180786505
2.71000004	0.177103832
2.72000003	0.17534174
2.73000002	0.169318721
2.74000001	0.166917875
2.75	0.153281227
2.75999999	0.156288415
2.76999998	0.149775609
2.77999997	0.145019516
2.78999996	0.130735859
2.79999995	0.120991483
2.80999994	0.13823162
2.81999993	0.133574471
2.82999992	0.129719839
2.83999991	0.13154079
2.8499999	0.134585634
2.8599999	0.133904696
2.86999989	0.130039901
2.87999988	0.126760378
2.8900001	0.122971423
2.9000001	0.116968699
2.91000009	0.112923086
2.92000008	0.112542182
2.93000007	0.115186818
2.94000006	0.116863839
2.95000005	0.117907859
2.96000004	0.119106278
2.97000003	0.119334936
2.98000002	0.120523259
2.99000001	0.125771031
3	0.123854175
3.00999999	0.124677613
3.01999998	0.124370456
3.02999997	0.128455043
3.03999996	0.129926175
3.04999995	0.135640696
3.05999994	0.135301799
3.06999993	0.137921035
3.07999992	0.142641291
3.08999991	0.144238606
3.0999999	0.145769268
3.1099999	0.147795573
3.11999989	0.148557693
3.12999988	0.234175771
3.1400001	0.263853252
3.1500001	0.125876158
3.16000009	0.160354659
3.17000008	0.134097025
3.18000007	0.155296504
3.19000006	0.163410217
3.20000005	0.166454718
3.21000004	0.154737994
3.22000003	0.152632251
3.23000002	0.156715855
3.24000001	0.14405033
3.25	0.139100686
3.25999999	0.119839489
3.26999998	0.133018807
3.27999997	0.128999248
3.28999996	0.135067523
3.29999995	0.160256177
3.30999994	0.180269793
3.31999993	0.204692155
3.32999992	0.23868832
3.33999991	0.241203696
3.3499999	0.253612995
3.3599999	0.348462105
3.36999989	0.254726052
3.37999988	0.288321882
3.3900001	0.308946818
3.4000001	0.312551081
3.41000009	0.33607322
3.42000008	0.355867714
3.43000007	0.366304785
3.44000006	0.366914988
3.45000005	0.287580013
3.46000004	0.357391268
3.47000003	0.378792524
3.48000002	0.391997486
3.49000001	0.395469218
3.5	0.39434588
3.50999999	0.394613475
3.51999998	0.391083658
3.52999997	0.392689884
3.53999996	0.391967535
3.54999995	0.392046481
3.55999994	0.389804512
3.56999993	0.393133521
3.57999992	0.391281962
3.58999991	0.393102378
3.5999999	0.391495556
3.6099999	0.393891484
3.61999989	0.39217338
3.62999988	0.386276543
3.6400001	0.387008131
3.6500001	0.383392155
3.66000009	0.37832436
3.67000008	0.375923604
3.68000007	0.373453081
3.69000006	0.372517914
3.70000005	0.36719355
3.71000004	0.36416924
3.72000003	0.359238237
3.73000002	0.352739394
3.74000001	0.352052033
3.75	0.350037903
3.75999999	0.33373946
3.76999998	0.339834213
3.77999997	0.338179648
3.78999996	0.334330618
3.79999995	0.332452804
3.80999994	0.329348654
3.81999993	0.33208856
3.82999992	0.333462268
3.83999991	0.330951691
3.8499999	0.326200038
3.8599999	0.321064591
3.86999989	0.312698603
3.87999988	0.311277211
3.8900001	0.311629057
3.9000001	0.313750774
3.91000009	0.314910561
3.92000008	0.314572036
3.93000007	0.315544248
3.94000006	0.316471666
3.95000005	0.317261696
3.96000004	0.316836774
3.97000003	0.320258498
3.98000002	0.31951049
3.99000001	0.319877326
4	0.321120828
4.01000023	0.322384477
4.02000046	0.324191421
4.03000021	0.328259915
4.04000044	0.327246606
4.05000019	0.330495954
4.06000042	0.334672093
4.07000017	0.335512727
4.0800004	0.336593151
4.09000015	0.340788901
4.10000038	0.344452381
4.11000013	0.385158151
4.12000036	0.497858465
4.13000011	0.346933395
4.14000034	0.373957783
4.1500001	0.365301818
4.16000032	0.374762088
4.17000008	0.375728726
4.18000031	0.376053631
4.19000006	0.359434009
4.20000029	0.354851216
4.21000004	0.360353082
4.22000027	0.357184708
4.23000002	0.33386457
4.24000025	0.341290236
4.25	0.365022689
4.26000023	0.381255299
4.27000046	0.387337416
4.28000021	0.386097103
4.29000044	0.382564873
4.30000019	0.37560913
4.31000042	0.374143094
4.32000017	0.33909598
4.3300004	0.345734626
4.34000015	0.403769642
4.35000038	0.407544434
4.36000013	0.438774586
4.37000036	0.421130478
4.38000011	0.435376525
4.39000034	0.44421652
4.4000001	0.472576708
4.41000032	0.493549019
4.42000008	0.507041395
4.43000031	0.534352243
4.44000006	0.553705812
4.45000029	0.550900996
4.46000004	0.553988814
4.47000027	0.566194892
4.48000002	0.485728621
4.49000025	0.557513416
4.5	0.578693211
4.51000023	0.59252584
4.52000046	0.594524682
4.53000021	0.590754926
4.54000044	0.584808469
4.55000019	0.588263512
4.56000042	0.590965927
4.57000017	0.592581213
4.5800004	0.598016202
4.59000015	0.596417248
4.60000038	0.598680556
4.61000013	0.603334069
4.62000036	0.596132815
4.63000011	0.593961716
4.64000034	0.591569126
4.6500001	0.594670534
4.66000032	0.590808272
4.67000008	0.588188469
4.68000031	0.584219456
4.69000006	0.582623839
4.70000029	0.582180917
4.71000004	0.576853216
4.72000027	0.568693399
4.73000002	0.567507088
4.74000025	0.56301403
4.75	0.55342555
4.76000023	0.550499141
4.77000046	0.54237783
4.78000021	0.522938788
4.79000044	0.518034279
4.80000019	0.532334447
4.81000042	0.527138829
4.82000017	0.520898581
4.8300004	0.525967777
4.84000015	0.524896085
4.85000038	0.531555891
4.86000013	0.525656223
4.87000036	0.521767378
4.88000011	0.516631484
4.89000034	0.512438476
4.9000001	0.508103848
4.91000032	0.509338021
4.92000008	0.510394394
4.93000031	0.511484325
4.94000006	0.513322592
4.95000029	0.515099108
4.96000004	0.51563853
4.97000027	0.51619041
4.98000002	0.512041032
4.99000025	0.515411198
5	0.517114341
5.01000023	0.517614722
5.02000046	0.518506467
5.03000021	0.521254778
5.04000044	0.52615279
5.05000019	0.526510239
5.06000042	0.527441144
5.07000017	0.531466722
5.0800004	0.533392727
5.09000015	0.537933171
5.10000038	0.538960874
5.11000013	0.542217851
5.12000036	0.651836634
5.13000011	0.709950209
5.14000034	0.506486475
5.1500001	0.545275271
5.16000032	0.505196452
5.17000008	0.513234913
5.18000031	0.566215456
5.19000006	0.560328066
5.20000029	0.557786703
5.21000004	0.554812431
5.22000027	0.556791365
5.23000002	0.573032677
5.24000025	0.564846814
5.25	0.548703372
5.26000023	0.537210643
5.27000046	0.526817799
5.28000021	0.523219585
5.29000044	0.528720438
5.30000019	0.535810232
5.31000042	0.569865704
5.32000017	0.582927525
5.3300004	0.593483508
5.34000015	0.634474218
5.35000038	0.634429693
5.36000013	0.705303371
5.37000036	0.640183032
5.38000011	0.665937841
5.39000034	0.678697705
5.4000001	0.694609344
5.41000032	0.708357751
5.42000008	0.73143059
5.43000031	0.745923162
5.44000006	0.753756106
5.45000029	0.7570346
5.46000004	0.751781642
5.47000027	0.683003664
5.48000002	0.756268084
5.49000025	0.774122179
5.5	0.780989766
5.51000023	0.784307599
5.52000046	0.781419337
5.53000021	0.780955315
5.54000044	0.783605397
5.55000019	0.786854625
5.56000042	0.78806299
5.57000017	0.780827105
5.5800004	0.786863983
5.59000015	0.790144563
5.60000038	0.789664805
5.61000013	0.796802223
5.62000036	0.788739145
5.63000011	0.784663975
5.64000034	0.786222756
5.6500001	0.75635612
5.66000032	0.800426364
5.67000008	0.813646913
