# Supplementary material for: Universal Walking Control Framework of Biped Robot Based on Dynamic Model and Quadratic Programming
Source: Hindawi journal article supplement (doi:10.1155/2020/2789039), 2020-10-31
Supplement: f1 [file 2789039.f1.zip › Position control/Yzmp]

0.00999999978	0.0016008009
0.0199999996	0.000108075466
0.0299999993	0.00163311197
0.0399999991	0.00232214504
0.049999997	0.0036268835
0.0600000024	0.0025977171
0.0700000003	0.00226954627
0.0799999982	0.00111289346
0.0899999961	0.00118831196
0.100000001	0.000707554864
0.109999999	-0.00349421194
0.119999997	-0.00105528464
0.129999995	-0.00170514092
0.140000001	-0.00352952979
0.150000006	-0.00170071691
0.160000011	0.000884320412
0.170000002	-0.00111342454
0.180000007	0.000636205252
0.190000013	0.000701843295
0.200000003	0.00196319656
0.210000008	-0.000168753919
0.219999999	0.0015067769
0.230000004	0.00173691963
0.24000001	0.00413218094
0.25	0.00146541384
0.25999999	0.00182677875
0.269999981	0.00182362995
0.280000001	0.00117451057
0.289999992	0.00267346273
0.299999982	0.00101491192
0.310000002	0.00254493463
0.319999993	0.000778901449
0.329999983	0.00235810666
0.340000004	-0.00539835915
0.349999994	0.0540413186
0.359999985	-0.106958933
0.370000005	0.00656256033
0.379999995	-0.0331919603
0.389999986	-0.00888156891
0.399999976	-0.00439077429
0.409999996	-0.00705664651
0.419999987	-0.00147283147
0.429999977	0.00128048251
0.439999998	-0.000583107932
0.449999988	0.0109966649
0.459999979	-0.015146791
0.469999999	0.00343142496
0.479999989	0.00352647854
0.48999998	0.0014891593
0.5	0.000794271182
0.50999999	0.00590020791
0.519999981	0.00295815826
0.529999971	0.00545054441
0.539999962	0.00744017726
0.550000012	0.00365953706
0.560000002	0.0016973099
0.569999993	0.00326528004
0.579999983	0.000218224435
0.589999974	-0.000949261652
0.599999964	-0.000354127696
0.610000014	4.55112859e-05
0.620000005	0.00406315317
0.629999995	0.00579887303
0.639999986	0.004770339
0.649999976	0.00380688696
0.659999967	0.00158066279
0.670000017	-0.000455731672
0.680000007	0.00011124881
0.689999998	0.00157866569
0.699999988	0.00140047958
0.709999979	0.00178139319
0.719999969	0.00331700314
0.730000019	0.00119521946
0.74000001	0.00359589956
0.75	0.00355027593
0.75999999	0.00511215301
0.769999981	0.00400242675
0.779999971	0.00196539285
0.789999962	0.00243910775
0.800000012	0.00188770914
0.810000002	0.00260803499
0.819999993	0.000889289309
0.829999983	0.00283496547
0.839999974	0.00674241921
0.849999964	0.00476489076
0.860000014	0.00162351108
0.870000005	0.00171649747
0.879999995	0.00334156957
0.889999986	0.00412933156
0.899999976	0.00239700545
0.909999967	0.00597770931
0.920000017	0.00580646703
0.930000007	0.0019595921
0.939999998	0.00159212225
0.949999988	0.00416167499
0.959999979	0.00489977561
0.969999969	0.00351873599
0.980000019	0.00387584651
0.99000001	0.00410305429
1	0.00564332074
1.00999999	0.00314182299
1.01999998	0.00394694787
1.02999997	0.0089113377
1.03999996	0.00660799816
1.04999995	0.00246886048
1.05999994	0.00494231144
1.06999993	0.0060913153
1.08000004	0.00594206154
1.09000003	0.0044475738
1.10000002	0.00740226498
1.11000001	0.00979749858
1.12	0.00333742728
1.13	0.00763755664
1.13999999	0.00577292126
1.14999998	0.00728376256
1.15999997	0.00692119123
1.16999996	0.00704508601
1.17999995	0.00120320905
1.18999994	0.00939804036
1.20000005	0.00659135403
1.21000004	0.00617787335
1.22000003	0.00470406283
1.23000002	0.00780726876
1.24000001	0.0084724417
1.25	0.0103371674
1.25999999	0.0182532594
1.26999998	0.0210198704
1.27999997	0.0306447465
1.28999996	0.0321351029
1.29999995	0.0329168104
1.30999994	0.0419821143
1.31999993	0.0451308563
1.33000004	0.0513065234
1.34000003	0.0568281338
1.35000002	0.0695355982
1.36000001	0.0781158134
1.37	0.0718072355
1.38	0.0898176283
1.38999999	0.0989644676
1.39999998	0.103957847
1.40999997	0.112163261
1.41999996	0.117507368
1.42999995	0.112285256
1.43999994	0.124934554
1.45000005	0.139904991
1.46000004	0.13796331
1.47000003	0.135950848
1.48000002	0.130051464
1.49000001	0.127363473
1.5	0.127328902
1.50999999	0.125600263
1.51999998	0.124193944
1.52999997	0.120579444
1.53999996	0.122880563
1.54999995	0.120758824
1.55999994	0.117526665
1.56999993	0.115367554
1.58000004	0.115005434
1.59000003	0.114273205
1.60000002	0.115671933
1.61000001	0.11762736
1.62	0.118961506
1.63	0.118443407
1.63999999	0.119730629
1.64999998	0.119100988
1.65999997	0.121321887
1.66999996	0.118784316
1.67999995	0.120725043
1.68999994	0.120875672
1.70000005	0.120456286
1.71000004	0.121191241
1.72000003	0.122588098
1.73000002	0.122895837
1.74000001	0.121669672
1.75	0.122931212
1.75999999	0.125962794
1.76999998	0.129473582
1.77999997	0.125575066
1.78999996	0.126799196
1.79999995	0.122920208
1.80999994	0.128195897
1.81999993	0.126172259
1.83000004	0.129733875
1.84000003	0.12900199
1.85000002	0.126343757
1.86000001	0.127087429
1.87	0.127753586
1.88	0.127430543
1.88999999	0.129514098
1.89999998	0.127271935
1.90999997	0.12948823
1.91999996	0.129342198
1.92999995	0.124539457
1.93999994	0.12937361
1.95000005	0.127639994
1.96000004	0.129155681
1.97000003	0.128405854
1.98000002	0.127477616
1.99000001	0.12687701
2	0.126428768
2.00999999	0.126582623
2.01999998	0.12421754
2.02999997	0.127030283
2.03999996	0.126667216
2.04999995	0.126785278
2.05999994	0.126769766
2.06999993	0.126047596
2.07999992	0.125049874
2.08999991	0.121449657
2.0999999	0.122835658
2.1099999	0.123201929
2.11999989	0.122373998
2.12999988	0.120100826
2.1400001	0.0368089974
2.1500001	-0.0212790947
2.16000009	0.127211034
2.17000008	0.124302402
2.18000007	0.138581797
2.19000006	0.129665032
2.20000005	0.0952012688
2.21000004	0.0955997631
2.22000003	0.0978592113
2.23000002	0.112273827
2.24000001	0.131608784
2.25	0.127693072
2.25999999	0.0782572031
2.26999998	0.0754346177
2.27999997	0.0813917667
2.28999996	0.0816062018
2.29999995	0.0798984468
2.30999994	0.0758249834
2.31999993	0.0672947764
2.32999992	0.0573927015
2.33999991	0.0402445346
2.3499999	0.0274768434
2.3599999	-0.0318872221
2.36999989	0.00655258261
2.37999988	-0.0187614243
2.3900001	-0.0349873714
2.4000001	-0.0516443029
2.41000009	-0.098439455
2.42000008	-0.083378464
2.43000007	-0.0942338482
2.44000006	-0.0969097614
2.45000005	-0.105429031
2.46000004	-0.103824556
2.47000003	-0.109377138
2.48000002	-0.01526553
2.49000001	-0.0782528445
2.5	-0.122009329
2.50999999	-0.144479319
2.51999998	-0.14164263
2.52999997	-0.140277073
2.53999996	-0.139328137
2.54999995	-0.139077336
2.55999994	-0.139130011
2.56999993	-0.136810079
2.57999992	-0.134576648
2.58999991	-0.134624854
2.5999999	-0.13353771
2.6099999	-0.132124767
2.61999989	-0.130069286
2.62999988	-0.127704158
2.6400001	-0.125790372
2.6500001	-0.124403298
2.66000009	-0.122918226
2.67000008	-0.121605039
2.68000007	-0.121332288
2.69000006	-0.121010035
2.70000005	-0.121002562
2.71000004	-0.121610731
2.72000003	-0.121891826
2.73000002	-0.122833796
2.74000001	-0.123309195
2.75	-0.124865122
2.75999999	-0.12677674
2.76999998	-0.127664194
2.77999997	-0.126260832
2.78999996	-0.128409371
2.79999995	-0.128456771
2.80999994	-0.128072158
2.81999993	-0.126992315
2.82999992	-0.125781924
2.83999991	-0.124171585
2.8499999	-0.123510681
2.8599999	-0.124090932
2.86999989	-0.12485572
2.87999988	-0.126267567
2.8900001	-0.127056241
2.9000001	-0.127343819
2.91000009	-0.126339778
2.92000008	-0.127411604
2.93000007	-0.128208622
2.94000006	-0.129153997
2.95000005	-0.129930526
2.96000004	-0.130460754
2.97000003	-0.130910918
2.98000002	-0.131258175
2.99000001	-0.130283698
3	-0.129825875
3.00999999	-0.128954917
3.01999998	-0.129127875
3.02999997	-0.128788859
3.03999996	-0.127663583
3.04999995	-0.12778239
3.05999994	-0.127964839
3.06999993	-0.128366157
3.07999992	-0.129479885
3.08999991	-0.129142538
3.0999999	-0.128873542
3.1099999	-0.128357828
3.11999989	-0.126868531
3.12999988	-0.00273582386
3.1400001	0.0560147166
3.1500001	-0.14033778
3.16000009	-0.124395773
3.17000008	-0.119585946
3.18000007	-0.093769379
3.19000006	-0.0830176324
3.20000005	-0.0886061937
3.21000004	-0.096784398
3.22000003	-0.101219304
3.23000002	-0.107420705
3.24000001	-0.107406348
3.25	-0.130159393
3.25999999	-0.122346632
3.26999998	-0.122195013
3.27999997	-0.122360706
3.28999996	-0.122479379
3.29999995	-0.10405948
3.30999994	-0.0905787498
3.31999993	-0.0756342411
3.32999992	-0.0507942587
3.33999991	-0.0444901735
3.3499999	-0.0340740122
3.3599999	0.0695282146
3.36999989	-0.0403244905
3.37999988	-0.0144582512
3.3900001	0.00739031285
3.4000001	0.0217137337
3.41000009	0.042905122
3.42000008	0.0661485121
3.43000007	0.0871957392
3.44000006	0.09896487
3.45000005	-0.0465130694
3.46000004	0.0664573014
3.47000003	0.1127223
3.48000002	0.147881955
3.49000001	0.146208853
3.5	0.14506875
3.50999999	0.143983439
3.51999998	0.143801004
3.52999997	0.142687127
3.53999996	0.141989544
3.54999995	0.140875474
3.55999994	0.137853205
3.56999993	0.135697111
3.57999992	0.133857325
3.58999991	0.132428691
3.5999999	0.13129051
3.6099999	0.12916711
3.61999989	0.128205061
3.62999988	0.127023831
3.6400001	0.126553819
3.6500001	0.126037791
3.66000009	0.125080168
3.67000008	0.125273719
3.68000007	0.125298858
3.69000006	0.125198498
3.70000005	0.124923572
3.71000004	0.125562474
3.72000003	0.12544699
3.73000002	0.124909416
3.74000001	0.12528871
3.75	0.124762535
3.75999999	0.125702128
3.76999998	0.126853541
3.77999997	0.126537323
3.78999996	0.124574766
3.79999995	0.123873062
3.80999994	0.122388817
3.81999993	0.122215077
3.82999992	0.123681203
3.83999991	0.124314822
3.8499999	0.125472009
3.8599999	0.127217621
3.86999989	0.127886981
3.87999988	0.128089175
3.8900001	0.128595814
3.9000001	0.129469872
3.91000009	0.130349845
3.92000008	0.131402537
3.93000007	0.131976828
3.94000006	0.132527351
3.95000005	0.132732153
3.96000004	0.132945165
3.97000003	0.133079112
3.98000002	0.132944867
3.99000001	0.132861137
4	0.132497981
4.01000023	0.1315725
4.02000046	0.131059408
4.03000021	0.130024314
4.04000044	0.129351526
4.05000019	0.128724247
4.06000042	0.128515214
4.07000017	0.129758611
4.0800004	0.129610479
4.09000015	0.128860727
4.10000038	0.128430888
4.11000013	0.0880600512
4.12000036	-0.0284275226
4.13000011	0.116798058
4.14000034	0.10748148
4.1500001	0.0923970044
4.16000032	0.0768498629
4.17000008	0.0751421228
4.18000031	0.0828980133
4.19000006	0.0860023648
4.20000029	0.0931838825
4.21000004	0.0862356052
4.22000027	0.078579016
4.23000002	0.119989783
4.24000025	0.110096693
4.25	0.0915755332
4.26000023	0.0790018663
4.27000046	0.0775786787
4.28000021	0.0793277174
4.29000044	0.0802112743
4.30000019	0.0870919302
4.31000042	0.0909433141
4.32000017	0.132831275
4.3300004	0.135931641
4.34000015	0.0751041919
4.35000038	0.0829332843
4.36000013	0.056102436
4.37000036	0.0833688676
4.38000011	0.0763124228
4.39000034	0.0549279377
4.4000001	0.0234875903
4.41000032	-0.0181906484
4.42000008	-0.0419476777
4.43000031	-0.0779910833
4.44000006	-0.090517126
4.45000029	-0.0919761807
4.46000004	-0.098571822
4.47000027	-0.104712293
4.48000002	0.0344328545
4.49000025	-0.0853899419
4.5	-0.121808611
4.51000023	-0.136039674
4.52000046	-0.135112524
4.53000021	-0.134881124
4.54000044	-0.133954361
4.55000019	-0.132974207
4.56000042	-0.132765859
4.57000017	-0.131971776
4.5800004	-0.13023597
4.59000015	-0.128202915
4.60000038	-0.125491485
4.61000013	-0.122284569
4.62000036	-0.118554249
4.63000011	-0.118186042
4.64000034	-0.116587766
4.6500001	-0.116750985
4.66000032	-0.114690475
4.67000008	-0.114042029
4.68000031	-0.112855263
4.69000006	-0.112790413
4.70000029	-0.11297407
4.71000004	-0.113208942
4.72000027	-0.115456581
4.73000002	-0.116492748
4.74000025	-0.118031457
4.75	-0.118438959
4.76000023	-0.119477332
4.77000046	-0.118570447
4.78000021	-0.118429624
4.79000044	-0.119117878
4.80000019	-0.119035505
4.81000042	-0.119071737
4.82000017	-0.116798587
4.8300004	-0.116660997
4.84000015	-0.115576036
4.85000038	-0.117032602
4.86000013	-0.117175028
4.87000036	-0.11773254
4.88000011	-0.118614666
4.89000034	-0.12003433
4.9000001	-0.12076579
4.91000032	-0.122383118
4.92000008	-0.122164659
4.93000031	-0.124091126
4.94000006	-0.124573551
4.95000029	-0.124313295
4.96000004	-0.124130957
4.97000027	-0.124073088
4.98000002	-0.123331867
4.99000025	-0.123324029
5	-0.122874394
5.01000023	-0.122454099
5.02000046	-0.121767156
5.03000021	-0.121005394
5.04000044	-0.120497636
5.05000019	-0.119312406
5.06000042	-0.119981386
5.07000017	-0.120678887
5.0800004	-0.121459082
5.09000015	-0.121776827
5.10000038	-0.120006017
5.11000013	-0.11845956
5.12000036	-0.00521131279
5.13000011	0.0702757314
5.14000034	-0.131184667
5.1500001	-0.121604882
5.16000032	-0.123089664
5.17000008	-0.123349689
5.18000031	-0.0570473075
5.19000006	-0.0526152439
5.20000029	-0.0823462829
5.21000004	-0.0910296142
5.22000027	-0.086837396
5.23000002	-0.0578347221
5.24000025	-0.0911201164
5.25	-0.101537786
5.26000023	-0.10585659
5.27000046	-0.117771275
5.28000021	-0.117754251
5.29000044	-0.118437298
5.30000019	-0.118929513
5.31000042	-0.0948977172
5.32000017	-0.0884956867
5.3300004	-0.075143829
5.34000015	-0.0539098717
5.35000038	-0.0509747677
5.36000013	0.0223236214
5.37000036	-0.0454251729
5.38000011	-0.0296788253
5.39000034	0.00068962021
5.4000001	0.0205602683
5.41000032	0.0375260189
5.42000008	0.0660087541
5.43000031	0.0960044712
5.44000006	0.108623192
5.45000029	0.111263566
5.46000004	0.114701837
5.47000027	-0.0304738469
5.48000002	0.0869018137
5.49000025	0.12962994
5.5	0.151487172
5.51000023	0.149822921
5.52000046	0.150059819
5.53000021	0.14955157
5.54000044	0.14864549
5.55000019	0.147677004
5.56000042	0.146824807
5.57000017	0.14595595
5.5800004	0.14467977
5.59000015	0.143885747
5.60000038	0.141326532
5.61000013	0.138125345
5.62000036	0.134633377
5.63000011	0.132787868
5.64000034	0.133080125
5.6500001	0.166174695
5.66000032	0.178228557
5.67000008	0.180889234
