# Supplementary material for: Universal Walking Control Framework of Biped Robot Based on Dynamic Model and Quadratic Programming
Source: Hindawi journal article supplement (doi:10.1155/2020/2789039), 2020-10-31
Supplement: f1 [file 2789039.f1.zip › sim/angle ankle pitch]

0	0
0.0199999996	-12.37391
0.0399999991	-12.3576145
0.0599999987	-12.5880213
0.0799999982	-13.5810528
0.099999994	-15.3116608
0.120000005	-17.4507923
0.140000001	-19.5517445
0.159999996	-21.1808853
0.179999992	-22.0118847
0.200000003	-21.8461304
0.219999999	-20.6739902
0.239999995	-18.790081
0.25999999	-16.9074268
0.280000001	-15.2772999
0.300000012	-13.8668795
0.320000023	-12.823741
0.340000004	-12.0827503
0.360000014	-11.5900879
0.380000025	-11.3008385
0.400000006	-11.1806726
0.420000017	-11.1935377
0.439999998	-11.3181067
0.460000008	-11.5337143
0.480000019	-11.8239536
0.5	-12.1742086
0.519999981	-12.5719786
0.539999962	-13.0064507
0.560000002	-13.4686956
0.579999983	-13.9482965
0.599999964	-14.4331341
0.620000005	-14.9298677
0.639999986	-15.4094944
0.659999967	-16.1573162
0.680000007	-17.7879276
0.699999988	-20.1030159
0.719999969	-22.5572586
0.74000001	-24.4942131
0.75999999	-25.3739777
0.779999971	-24.9459496
0.799999952	-23.2162628
0.819999993	-20.3662395
0.839999974	-16.8457508
0.859999955	-13.7146521
0.879999995	-11.3253717
0.899999976	-9.57657719
0.919999957	-8.41012096
0.939999998	-7.71288109
0.959999979	-7.39101887
0.979999959	-7.36665773
1	-7.57789707
1.01999998	-7.97528839
1.03999996	-8.51590252
1.05999994	-9.16646576
1.07999992	-9.89733601
1.10000002	-10.6842108
1.12	-11.5046482
1.13999999	-12.3371601
1.15999997	-13.159339
1.17999995	-13.9223824
1.19999993	-14.6082401
1.22000003	-15.1316051
1.24000001	-15.3011398
1.25999999	-15.7789612
1.27999997	-17.7420292
1.29999995	-20.5568314
1.31999993	-23.3757191
1.34000003	-25.2712631
1.36000001	-25.545517
1.38	-23.9885464
1.39999998	-20.7380562
1.41999996	-15.9786234
1.43999994	-12.7485714
1.46000004	-10.1176682
1.48000002	-7.38180542
1.5	-4.6145606
1.51999998	-2.82767367
1.53999996	-1.90833271
1.55999994	-1.65159357
1.57999992	-1.89953899
1.60000002	-2.53181505
1.62	-3.45350027
1.63999999	-4.58715248
1.65999997	-5.85037422
1.67999995	-7.19876099
1.69999993	-8.57940197
1.72000003	-9.94024467
1.74000001	-11.2200756
1.75999999	-12.3359518
1.77999997	-13.1402597
1.79999995	-13.3323002
1.81999993	-13.217247
1.84000003	-12.7805939
1.86000001	-12.5091705
1.88	-14.3456068
1.89999998	-17.9481869
1.91999996	-21.7439785
1.93999994	-24.566925
1.96000004	-25.5255547
1.98000002	-24.3171768
2	-21.1401215
2.01999998	-16.2826614
2.03999996	-13.324791
2.05999994	-10.8679543
2.07999992	-8.19473362
2.0999999	-5.42101145
2.11999989	-3.60773277
2.13999987	-2.64986348
2.16000009	-2.36814594
2.18000007	-2.57191014
2.20000005	-3.16167498
2.22000003	-4.04360008
2.24000001	-5.14071751
2.25999999	-6.38954353
2.27999997	-7.71225595
2.29999995	-9.07231998
2.31999993	-10.4175758
2.33999991	-11.6894054
2.3599999	-12.8073044
2.37999988	-13.6319952
2.4000001	-13.89429
2.42000008	-13.8391418
2.44000006	-13.4526758
2.46000004	-13.2268963
2.48000002	-15.040864
2.5	-18.5727196
2.51999998	-22.2989883
2.53999996	-25.0587711
2.55999994	-25.9619484
2.57999992	-24.7100296
2.5999999	-21.5016823
2.61999989	-16.6310959
2.63999987	-13.6688347
2.66000009	-11.2098017
2.68000007	-8.53408432
2.70000005	-5.75821161
2.72000003	-3.93379593
2.74000001	-2.96048617
2.75999999	-2.66202521
2.77999997	-2.8488946
2.79999995	-3.4229815
2.81999993	-4.2905407
2.83999991	-5.3757143
2.8599999	-6.61451387
2.87999988	-7.93012142
2.9000001	-9.28471279
2.92000008	-10.6258097
2.94000006	-11.8953629
2.96000004	-13.0150366
2.98000002	-13.8497019
3	-14.1434336
3.01999998	-14.1143799
3.03999996	-13.7485638
3.05999994	-13.5407467
3.07999992	-15.3470612
3.0999999	-18.8465347
3.11999989	-22.5411797
3.13999987	-25.2718754
3.16000009	-26.1495304
3.18000007	-24.877512
3.20000005	-21.6542912
3.22000003	-16.7754726
3.24000001	-13.806922
3.25999999	-11.3416748
3.27999997	-8.66011047
3.29999995	-5.87883234
3.31999993	-4.04709101
3.33999991	-3.06635571
3.3599999	-2.76043987
3.37999988	-2.94058609
3.4000001	-3.50847626
3.42000008	-4.37077475
3.44000006	-5.45099354
3.46000004	-6.68590975
3.48000002	-7.99780226
3.5	-9.34993172
3.51999998	-10.6899214
3.53999996	-11.9592314
3.55999994	-13.0792208
3.57999992	-13.9166136
3.5999999	-14.2187529
3.61999989	-14.1961889
3.63999987	-13.8353062
3.66000009	-13.6316233
3.68000007	-15.4323826
3.70000005	-18.9244442
3.72000003	-22.6105862
3.74000001	-25.3336601
3.75999999	-26.2045479
3.77999997	-24.9271183
3.79999995	-21.7001381
3.81999993	-16.8196659
3.83999991	-13.8524008
3.8599999	-11.3879709
3.87999988	-8.70756912
3.9000001	-5.92509127
3.92000008	-4.09281921
3.94000006	-3.11036825
3.96000004	-2.80266094
3.98000002	-2.98075724
4	-3.54682326
4.01999998	-4.40715981
4.03999996	-5.48549557
4.05999994	-6.71819592
4.07999992	-8.02889347
4.0999999	-9.38007832
4.11999989	-10.7198162
4.13999987	-11.9892101
4.15999985	-13.1110897
4.17999983	-13.9520674
4.19999981	-14.2617731
4.21999979	-14.2471609
4.23999977	-13.8939066
4.25999975	-13.6973104
4.28000021	-15.4993935
4.30000019	-18.986578
4.32000017	-22.6675014
4.34000015	-25.3857327
4.36000013	-26.2522888
4.38000011	-24.9715347
4.4000001	-21.7420635
4.42000008	-16.8612366
4.44000006	-13.8941174
4.46000004	-11.4302044
4.48000002	-8.75330448
4.5	-5.9740386
4.51999998	-4.14112425
4.53999996	-3.15733981
4.55999994	-2.84770679
4.57999992	-3.02362323
4.5999999	-3.58730626
4.61999989	-4.44496775
4.63999987	-5.52102232
4.65999985	-6.75097322
4.67999983	-8.05875111
4.69999981	-9.40668011
4.71999979	-10.7430601
4.73999977	-12.009984
4.75999975	-13.1295643
4.78000021	-13.9700975
4.80000019	-14.282382
4.82000017	-14.2702961
4.84000015	-13.9197416
4.86000013	-13.7260885
4.88000011	-15.5284424
4.9000001	-19.0115032
4.92000008	-22.688942
4.94000006	-25.4040108
4.96000004	-26.2678185
4.98000002	-24.9849014
5	-21.754015
5.01999998	-16.8732777
5.03999996	-13.9072094
5.05999994	-11.4442205
5.07999992	-8.76755238
5.0999999	-5.98662376
5.11999989	-4.15390778
5.13999987	-3.16919112
5.15999985	-2.8587184
5.17999983	-3.03381038
5.19999981	-3.59631824
5.21999979	-4.45296669
5.23999977	-5.52780104
5.25999975	-6.75703144
5.28000021	-8.06451416
5.30000019	-9.41308689
5.32000017	-10.7508678
5.34000015	-12.0191422
5.36000013	-13.1411982
5.38000011	-13.9852543
5.4000001	-14.3043556
5.42000008	-14.298521
5.44000006	-13.9537373
5.46000004	-13.7666063
5.48000002	-15.5684824
5.5	-19.0478725
5.51999998	-22.7213345
5.53999996	-25.4326687
5.55999994	-26.2931404
5.57999992	-25.008028
5.5999999	-21.7756367
5.61999989	-16.8953705
5.63999987	-13.9300203
5.65999985	-11.4670525
5.67999983	-8.7902441
5.69999981	-6.01141739
5.71999979	-4.17759991
5.73999977	-3.1917212
5.75999975	-2.88006735
5.78000021	-3.05394125
5.80000019	-3.61568666
5.82000017	-4.47157192
5.84000015	-5.54613495
5.86000013	-6.7754817
5.88000011	-8.08270454
5.9000001	-9.43077183
5.92000008	-10.767909
5.94000006	-12.0357332
5.96000004	-13.156951
5.98000002	-14.0006342
6	-14.3197355
6.01999998	-14.313323
6.03999996	-13.967474
6.05999994	-13.7788982
6.07999992	-15.5797863
6.0999999	-19.0575008
6.11999989	-22.7295628
6.13999987	-25.4395485
6.15999985	-26.2988205
6.17999983	-25.012352
6.19999981	-21.7791023
6.21999979	-16.8985157
6.23999977	-13.9336023
6.25999975	-11.4715128
6.28000021	-8.79504395
6.30000019	-6.01627445
6.32000017	-4.18216991
6.34000015	-3.19602823
6.36000013	-2.884094
6.38000011	-3.05775809
6.4000001	-3.6192286
6.42000008	-4.47512913
6.44000006	-5.54975224
6.46000004	-6.7792964
6.48000002	-8.08739185
6.5	-9.43623543
6.51999998	-10.7744045
6.53999996	-12.0430708
6.55999994	-13.1657467
