# Supplementary material for: Universal Walking Control Framework of Biped Robot Based on Dynamic Model and Quadratic Programming
Source: Hindawi journal article supplement (doi:10.1155/2020/2789039), 2020-10-31
Supplement: f1 [file 2789039.f1.zip › sim/angle ankle roll]

0	0
0.0199999996	-1.55045092
0.0399999991	-1.6154803
0.0599999987	-1.72766769
0.0799999982	-1.90143228
0.099999994	-2.14536309
0.120000005	-2.45675302
0.140000001	-2.79601431
0.159999996	-3.08850241
0.179999992	-3.27101254
0.200000003	-3.33012581
0.219999999	-3.28800368
0.239999995	-3.17830443
0.25999999	-3.02508593
0.280000001	-2.82811165
0.300000012	-2.58106279
0.320000023	-2.29054356
0.340000004	-1.9743315
0.360000014	-1.64731324
0.380000025	-1.32209611
0.400000006	-1.01334429
0.420000017	-0.72228384
0.439999998	-0.459165275
0.460000008	-0.23145619
0.480000019	-0.0441102609
0.5	0.0976072773
0.519999981	0.189271033
0.539999962	0.227267161
0.560000002	0.208045885
0.579999983	0.127830774
0.599999964	-0.0167531092
0.620000005	-0.216509759
0.639999986	-0.450615346
0.659999967	-0.708393157
0.680000007	-1.00204849
0.699999988	-1.34881926
0.719999969	-1.75657153
0.74000001	-2.18722582
0.75999999	-2.55854845
0.779999971	-2.80128884
0.799999952	-2.90661478
0.819999993	-2.90603614
0.839999974	-2.83628273
0.859999955	-2.7211287
0.879999995	-2.55990982
0.899999976	-2.34690475
0.919999957	-2.0873127
0.939999998	-1.79847467
0.959999979	-1.49570417
0.979999959	-1.19581211
1	-0.900613368
1.01999998	-0.623903692
1.03999996	-0.373875201
1.05999994	-0.15723066
1.07999992	0.0197359417
1.10000002	0.152315736
1.12	0.236091524
1.13999999	0.267112821
1.15999997	0.241972953
1.17999995	0.157827109
1.19999993	0.0119075198
1.22000003	-0.184751168
1.24000001	-0.411240578
1.25999999	-0.657579839
1.27999997	-0.936146259
1.29999995	-1.27285516
1.31999993	-1.68005991
1.34000003	-2.12073636
1.36000001	-2.49430966
1.38	-2.72290397
1.39999998	-2.80839276
1.41999996	-2.79484749
1.43999994	-2.7354877
1.46000004	-2.63409877
1.48000002	-2.48496699
1.5	-2.28274798
1.51999998	-2.03499484
1.53999996	-1.75804782
1.55999994	-1.46592546
1.57999992	-1.17027915
1.60000002	-0.882206321
1.62	-0.611234784
1.63999999	-0.36635071
1.65999997	-0.15494734
1.67999995	0.0169716235
1.69999993	0.144187242
1.72000003	0.22275582
1.74000001	0.249242276
1.75999999	0.221381962
1.77999997	0.13754414
1.79999995	-0.00338868541
1.81999993	-0.194941938
1.84000003	-0.424008161
1.86000001	-0.670588136
1.88	-0.928586841
1.89999998	-1.23795033
1.91999996	-1.62559032
1.93999994	-2.06408095
1.96000004	-2.45313025
1.98000002	-2.69895911
2	-2.7933445
2.01999998	-2.78229046
2.03999996	-2.7265799
2.05999994	-2.62792635
2.07999992	-2.48118567
2.0999999	-2.28093791
2.11999989	-2.03490925
2.13999987	-1.75940347
2.16000009	-1.47368598
2.18000007	-1.17800128
2.20000005	-0.889966071
2.22000003	-0.619055092
2.24000001	-0.374092251
2.25999999	-0.162396088
2.27999997	0.00971693825
2.29999995	0.137071133
2.31999993	0.215592712
2.33999991	0.242468357
2.3599999	0.215220705
2.37999988	0.132111818
2.4000001	-0.0082826037
2.42000008	-0.199427232
2.44000006	-0.423018515
2.46000004	-0.664810956
2.48000002	-0.919827461
2.5	-1.23148251
2.51999998	-1.62148917
2.53999996	-2.06348228
2.55999994	-2.4549408
2.57999992	-2.70141339
2.5999999	-2.79567814
2.61999989	-2.7844193
2.63999987	-2.72825027
2.66000009	-2.62894201
2.68000007	-2.48167944
2.70000005	-2.2807138
2.72000003	-2.03381443
2.74000001	-1.75743186
2.75999999	-1.47057223
2.77999997	-1.17434788
2.79999995	-0.88531512
2.81999993	-0.613436937
2.83999991	-0.367842466
2.8599999	-0.156006292
2.87999988	0.0155906761
2.9000001	0.142203644
2.92000008	0.219684392
2.94000006	0.244920284
2.96000004	0.215688393
2.98000002	0.130593926
3	-0.0115242591
3.01999998	-0.204115629
3.03999996	-0.42917338
3.05999994	-0.671812594
3.07999992	-0.931766927
3.0999999	-1.24399304
3.11999989	-1.63467216
3.13999987	-2.07778263
3.16000009	-2.47027087
3.18000007	-2.71743417
3.20000005	-2.81262684
3.22000003	-2.80218077
3.24000001	-2.7470293
3.25999999	-2.6484921
3.27999997	-2.50162029
3.29999995	-2.30087233
3.31999993	-2.05427027
3.33999991	-1.7781378
3.3599999	-1.49136734
3.37999988	-1.19491148
3.4000001	-0.906146288
3.42000008	-0.634480715
3.44000006	-0.388865948
3.46000004	-0.176447213
3.48000002	-0.00387571007
3.5	0.124196336
3.51999998	0.203580096
3.53999996	0.231043741
3.55999994	0.204157487
3.57999992	0.121321291
3.5999999	-0.0187619943
3.61999989	-0.209565446
3.63999987	-0.432743579
3.66000009	-0.674262285
3.68000007	-0.928769767
3.70000005	-1.23912692
3.72000003	-1.62945354
3.74000001	-2.07224131
3.75999999	-2.46434903
3.77999997	-2.71124148
3.79999995	-2.80590916
3.81999993	-2.79523063
3.83999991	-2.73916221
3.8599999	-2.64027643
3.87999988	-2.49310946
3.9000001	-2.29234934
3.92000008	-2.04549646
3.94000006	-1.76911271
3.96000004	-1.48209906
3.98000002	-1.18577766
4	-0.896729171
4.01999998	-0.625050306
4.03999996	-0.379291654
4.05999994	-0.166770414
4.07999992	0.00605965592
4.0999999	0.13420099
4.11999989	0.213632166
4.13999987	0.241193563
4.15999985	0.214418665
4.17999983	0.131437331
4.19999981	-0.00901086256
4.21999979	-0.200357005
4.23999977	-0.424541116
4.25999975	-0.672093868
4.28000021	-0.926726937
4.30000019	-1.2370193
4.32000017	-1.62714469
4.34000015	-2.0699544
4.36000013	-2.46198106
4.38000011	-2.70799947
4.4000001	-2.80159974
4.42000008	-2.7897954
4.44000006	-2.73300314
4.46000004	-2.63344812
4.48000002	-2.48532557
4.5	-2.28404713
4.51999998	-2.03711343
4.53999996	-1.7607379
4.55999994	-1.47381544
4.57999992	-1.17762768
4.5999999	-0.888780057
4.61999989	-0.61740607
4.63999987	-0.371918082
4.65999985	-0.159635469
4.67999983	0.0129103009
4.69999981	0.140559405
4.71999979	0.219326407
4.73999977	0.246203452
4.75999975	0.218598455
4.78000021	0.134798974
4.80000019	-0.00636505149
4.82000017	-0.198196083
4.84000015	-0.422508717
4.86000013	-0.670185447
4.88000011	-0.924763978
4.9000001	-1.23598456
4.92000008	-1.62593842
4.94000006	-2.06871367
4.96000004	-2.46065831
4.98000002	-2.70688009
5	-2.8012104
5.01999998	-2.79021335
5.03999996	-2.73432827
5.05999994	-2.63571405
5.07999992	-2.48852086
5.0999999	-2.288064
5.11999989	-2.04144335
5.13999987	-1.76536107
5.15999985	-1.47861767
5.17999983	-1.182199
5.19999981	-0.893581629
5.21999979	-0.622165143
5.23999977	-0.376759619
5.25999975	-0.164675176
5.28000021	0.00769834034
5.30000019	0.135309532
5.32000017	0.214182973
5.34000015	0.241188064
5.36000013	0.21388492
5.38000011	0.130512357
5.4000001	-0.0101922574
5.42000008	-0.201730266
5.44000006	-0.425625294
5.46000004	-0.667804897
5.48000002	-0.923506498
5.5	-1.23593032
5.51999998	-1.62724686
5.53999996	-2.07154679
5.55999994	-2.46482134
5.57999992	-2.7116549
5.5999999	-2.80580854
5.61999989	-2.79358006
5.63999987	-2.73632669
5.65999985	-2.63659453
5.67999983	-2.48835707
5.69999981	-2.28672338
5.71999979	-2.03927231
5.73999977	-1.76241529
5.75999975	-1.4749794
5.78000021	-1.17831516
5.80000019	-0.889029503
5.82000017	-0.617175519
5.84000015	-0.371429622
5.86000013	-0.158983856
5.88000011	0.0138169564
5.9000001	0.141889185
5.92000008	0.221314356
5.94000006	0.248818532
5.96000004	0.221850529
5.98000002	0.138595834
6	-0.0021962563
6.01999998	-0.193874702
6.03999996	-0.418246269
6.05999994	-0.660775602
6.07999992	-0.916669965
6.0999999	-1.22928917
6.11999989	-1.62083161
6.13999987	-2.06526279
6.15999985	-2.45869708
6.17999983	-2.70598722
6.19999981	-2.80042529
6.21999979	-2.78833413
6.23999977	-2.7306459
6.25999975	-2.63031006
6.28000021	-2.4816277
6.30000019	-2.27962637
6.32000017	-2.03194046
6.34000015	-1.75483358
6.36000013	-1.46716809
6.38000011	-1.16991055
6.4000001	-0.880418777
6.42000008	-0.608277678
6.44000006	-0.362304509
6.46000004	-0.14988336
6.48000002	0.0227798037
6.5	0.150555626
6.51999998	0.229376137
6.53999996	0.25614363
6.55999994	0.228534132
