# Supplementary material for: Universal Walking Control Framework of Biped Robot Based on Dynamic Model and Quadratic Programming
Source: Hindawi journal article supplement (doi:10.1155/2020/2789039), 2020-10-31
Supplement: f1 [file 2789039.f1.zip › sim/angle hip pitch]

0	0
0.0199999996	-8.76252556
0.0399999991	-8.75425243
0.0599999987	-9.00928307
0.0799999982	-10.1001043
0.099999994	-12.0785923
0.120000005	-14.6949835
0.140000001	-17.5587502
0.159999996	-20.2239265
0.179999992	-22.2682381
0.200000003	-23.3544312
0.219999999	-23.3802662
0.239999995	-22.5787392
0.25999999	-21.6446838
0.280000001	-20.8396358
0.300000012	-20.1469841
0.320000023	-19.4418812
0.340000004	-18.7213345
0.360000014	-17.9834118
0.380000025	-17.227047
0.400000006	-16.4512539
0.420000017	-15.6549015
0.439999998	-14.8371792
0.460000008	-13.9967661
0.480000019	-13.1311665
0.5	-12.2371922
0.519999981	-11.3101749
0.539999962	-10.3438826
0.560000002	-9.33008671
0.579999983	-8.25856686
0.599999964	-7.11634636
0.620000005	-5.8262763
0.639999986	-4.402565
0.659999967	-3.24667954
0.680000007	-3.2761004
0.699999988	-4.62488985
0.719999969	-7.14053345
0.74000001	-10.5003242
0.75999999	-14.1985216
0.779999971	-17.5821037
0.799999952	-20.0507698
0.819999993	-21.2623005
0.839999974	-21.3117294
0.859999955	-21.0262699
0.879999995	-20.7548084
0.899999976	-20.4766083
0.919999957	-20.1214886
0.939999998	-19.6793423
0.959999979	-19.1437397
0.979999959	-18.5121422
1	-17.7842579
1.01999998	-16.9609814
1.03999996	-16.0417767
1.05999994	-15.0268908
1.07999992	-13.9143333
1.10000002	-12.6996326
1.12	-11.3756142
1.13999999	-9.93164349
1.15999997	-8.3522625
1.17999995	-6.58958912
1.19999993	-4.62749529
1.22000003	-2.22591472
1.24000001	0.72322613
1.25999999	3.3641746
1.27999997	4.0296154
1.29999995	2.81211042
1.31999993	-0.0881371573
1.34000003	-4.33997631
1.36000001	-9.29589939
1.38	-14.0010824
1.39999998	-17.5417385
1.41999996	-19.2732658
1.43999994	-20.1454391
1.46000004	-20.650629
1.48000002	-20.8361588
1.5	-20.7136497
1.51999998	-20.6360626
1.53999996	-20.5095615
1.55999994	-20.2620678
1.57999992	-19.8515644
1.60000002	-19.2559433
1.62	-18.4638481
1.63999999	-17.4678593
1.65999997	-16.2441864
1.67999995	-14.7960682
1.69999993	-13.1096582
1.72000003	-11.1626635
1.74000001	-8.91932774
1.75999999	-6.31564903
1.77999997	-3.21819496
1.79999995	0.554622412
1.81999993	4.17917061
1.84000003	7.64128351
1.86000001	10.9301815
1.88	13.0196838
1.89999998	12.1407824
1.91999996	9.15307713
1.93999994	4.47420406
1.96000004	-1.23327577
1.98000002	-6.88999128
2	-11.4099598
2.01999998	-14.0303106
2.03999996	-15.8027763
2.05999994	-17.0620155
2.07999992	-17.8661327
2.0999999	-18.2414494
2.11999989	-18.5778255
2.13999987	-18.7967186
2.16000009	-18.8590832
2.18000007	-18.6952019
2.20000005	-18.3095245
2.22000003	-17.6960716
2.24000001	-16.8521137
2.25999999	-15.7758894
2.27999997	-14.441535
2.29999995	-12.8541622
2.31999993	-10.9948301
2.33999991	-8.83049583
2.3599999	-6.30236053
2.37999988	-3.28837132
2.4000001	0.363038272
2.42000008	3.88376546
2.44000006	7.25976276
2.46000004	10.4714451
2.48000002	12.5491724
2.5	11.7116823
2.51999998	8.76720142
2.53999996	4.12572289
2.55999994	-1.54916859
2.57999992	-7.1791172
2.5999999	-11.6804714
2.61999989	-14.2983828
2.63999987	-16.0767574
2.66000009	-17.3440399
2.68000007	-18.1565266
2.70000005	-18.5394688
2.72000003	-18.8736172
2.74000001	-19.0854473
2.75999999	-19.138525
2.77999997	-18.9645157
2.79999995	-18.5685844
2.81999993	-17.9452038
2.83999991	-17.0924282
2.8599999	-16.0082111
2.87999988	-14.6676178
2.9000001	-13.0747032
2.92000008	-11.2109776
2.94000006	-9.04426479
2.96000004	-6.51703739
2.98000002	-3.51160979
3	0.110875934
3.01999998	3.60771108
3.03999996	6.96479416
3.05999994	10.1601658
3.07999992	12.2506218
3.0999999	11.4433231
3.11999989	8.5283947
3.13999987	3.91254425
3.16000009	-1.73999965
3.18000007	-7.35143328
3.20000005	-11.8382959
3.22000003	-14.4475203
3.24000001	-16.2195454
3.25999999	-17.4807968
3.27999997	-18.2874565
3.29999995	-18.6648464
3.31999993	-18.9917107
3.33999991	-19.1957703
3.3599999	-19.2411404
3.37999988	-19.0599365
3.4000001	-18.6574516
3.42000008	-18.0282383
3.44000006	-17.1699104
3.46000004	-16.0808163
3.48000002	-14.7358513
3.5	-13.1394939
3.51999998	-11.273057
3.53999996	-9.10467434
3.55999994	-6.5772109
3.57999992	-3.5735867
3.5999999	0.0416831523
3.61999989	3.53266716
3.63999987	6.88529778
3.66000009	10.0769873
3.68000007	12.1686125
3.70000005	11.3700943
3.72000003	8.46338558
3.74000001	3.85476375
3.75999999	-1.79151547
3.77999997	-7.39769936
3.79999995	-11.8805828
3.81999993	-14.4887438
3.83999991	-16.2622204
3.8599999	-17.5256805
3.87999988	-18.3345699
3.9000001	-18.7139606
3.92000008	-19.0411358
3.94000006	-19.2445679
3.96000004	-19.2888336
3.98000002	-19.1062794
4	-18.7022953
4.01999998	-18.0715256
4.03999996	-17.2115116
4.05999994	-16.1207409
4.07999992	-14.7747736
4.0999999	-13.1775732
4.11999989	-11.3106689
4.13999987	-9.14240742
4.15999985	-6.61547375
4.17999983	-3.61401582
4.19999981	-0.00526467478
4.21999979	3.47923112
4.23999977	6.82578659
4.25999975	10.0111904
4.28000021	12.1032286
4.30000019	11.3108196
4.32000017	8.41039848
4.34000015	3.80729771
4.36000013	-1.83402348
4.38000011	-7.43575716
4.4000001	-11.9153471
4.42000008	-14.5223999
4.44000006	-16.2960415
4.46000004	-17.5604191
4.48000002	-18.3708591
4.5	-18.7523136
4.51999998	-19.0803986
4.53999996	-19.2841034
4.55999994	-19.3282223
4.57999992	-19.1452389
4.5999999	-18.7405701
4.61999989	-18.1088924
4.63999987	-17.2480011
4.65999985	-16.1561432
4.67999983	-14.8087301
4.69999981	-13.2102327
4.71999979	-11.342104
4.73999977	-9.17260075
4.75999975	-6.64508581
4.78000021	-3.64381123
4.80000019	-0.0377358757
4.82000017	3.44419646
4.84000015	6.78822184
4.86000013	9.97093964
4.88000011	12.0638285
4.9000001	11.2746754
4.92000008	8.37762451
4.94000006	3.777349
4.96000004	-1.86152971
4.98000002	-7.46101284
5	-11.9389992
5.01999998	-14.5457191
5.03999996	-16.3195934
5.05999994	-17.5843735
5.07999992	-18.3956051
5.0999999	-18.7780895
5.11999989	-19.1063824
5.13999987	-19.3099632
5.15999985	-19.3537006
5.17999983	-19.1702518
5.19999981	-18.7650852
5.21999979	-18.1328831
5.23999977	-17.2713184
5.25999975	-16.1790485
5.28000021	-14.8313665
5.30000019	-13.2328444
5.32000017	-11.364934
5.34000015	-9.19610405
5.36000013	-6.66966724
5.38000011	-3.67079425
5.4000001	-0.0703086257
5.42000008	3.40656734
5.44000006	6.74589491
5.46000004	9.92409039
5.48000002	12.0172224
5.5	11.2320929
5.51999998	8.33909702
5.53999996	3.74248052
5.55999994	-1.89321172
5.57999992	-7.49053526
5.5999999	-11.9668999
5.61999989	-14.5732603
5.63999987	-16.347393
5.65999985	-17.6123905
5.67999983	-18.4232616
5.69999981	-18.8050308
5.71999979	-19.1319752
5.73999977	-19.3339348
5.75999975	-19.37607
5.78000021	-19.1910229
5.80000019	-18.7843647
5.82000017	-18.1507969
5.84000015	-17.2882957
5.86000013	-16.1951027
5.88000011	-14.8465042
5.9000001	-13.2472858
5.92000008	-11.3788071
5.94000006	-9.20948887
5.96000004	-6.68285227
5.98000002	-3.68382406
6	-0.0835391209
6.01999998	3.39354444
6.03999996	6.73356533
6.05999994	9.91268921
6.07999992	12.0069885
6.0999999	11.2229548
6.11999989	8.33100224
6.13999987	3.73528576
6.15999985	-1.8996067
6.17999983	-7.49601221
6.19999981	-11.9718237
6.21999979	-14.5781498
6.23999977	-16.3526554
6.25999975	-17.6182365
6.28000021	-18.429903
6.30000019	-18.8123093
6.32000017	-19.1395683
6.34000015	-19.3416348
6.36000013	-19.3838387
6.38000011	-19.1987305
6.4000001	-18.7920113
6.42000008	-18.1583958
6.44000006	-17.2958355
6.46000004	-16.2027836
6.48000002	-14.8544617
6.5	-13.2554426
6.51999998	-11.3872795
6.53999996	-9.21835136
6.55999994	-6.69199514
