# Supplementary material for: Universal Walking Control Framework of Biped Robot Based on Dynamic Model and Quadratic Programming
Source: Hindawi journal article supplement (doi:10.1155/2020/2789039), 2020-10-31
Supplement: f1 [file 2789039.f1.zip › sim/angle hip roll]

0	0
0.0199999996	1.52595329
0.0399999991	1.58896184
0.0599999987	1.69729257
0.0799999982	1.85123312
0.099999994	2.04937315
0.120000005	2.28602219
0.140000001	2.53877521
0.159999996	2.76612258
0.179999992	2.92639685
0.200000003	2.99960899
0.219999999	2.99176335
0.239999995	2.92044306
0.25999999	2.80165839
0.280000001	2.63476706
0.300000012	2.41392374
0.320000023	2.14622998
0.340000004	1.85013926
0.360000014	1.54112709
0.380000025	1.23220825
0.400000006	0.934734881
0.420000017	0.656823933
0.439999998	0.406490207
0.460000008	0.190173432
0.480000019	0.0132450834
0.5	-0.119675525
0.519999981	-0.204574093
0.539999962	-0.23781985
0.560000002	-0.216089651
0.579999983	-0.13633211
0.599999964	0.00454643043
0.620000005	0.196697727
0.639999986	0.420971721
0.659999967	0.662914276
0.680000007	0.917504549
0.699999988	1.18928671
0.719999969	1.49127626
0.74000001	1.82355595
0.75999999	2.14933515
0.779999971	2.40507579
0.799999952	2.55363846
0.819999993	2.59998655
0.839999974	2.56925631
0.859999955	2.48825216
0.879999995	2.35847354
0.899999976	2.17300248
0.919999957	1.93741202
0.939999998	1.66947687
0.959999979	1.38478076
0.979999959	1.09754503
1	0.817654133
1.01999998	0.555367529
1.03999996	0.319085717
1.05999994	0.115457028
1.07999992	-0.049854748
1.10000002	-0.172149777
1.12	-0.247607246
1.13999999	-0.272958964
1.15999997	-0.245298326
1.17999995	-0.162026092
1.19999993	-0.0205588732
1.22000003	0.169783413
1.24000001	0.392583191
1.25999999	0.629686534
1.27999997	0.864282489
1.29999995	1.11017084
1.31999993	1.39441776
1.34000003	1.73591793
1.36000001	2.08841014
1.38	2.35568571
1.39999998	2.4909656
1.41999996	2.50898123
1.43999994	2.47367406
1.46000004	2.39708614
1.48000002	2.2734437
1.5	2.09688926
1.51999998	1.87490761
1.53999996	1.62097132
1.55999994	1.34866035
1.57999992	1.07071698
1.60000002	0.798818707
1.62	0.543221056
1.63999999	0.313096315
1.65999997	0.115789078
1.67999995	-0.0429408178
1.69999993	-0.158678323
1.72000003	-0.227979526
1.74000001	-0.248520806
1.75999999	-0.218108416
1.77999997	-0.134479851
1.79999995	0.00706147542
1.81999993	0.196754649
1.84000003	0.415634215
1.86000001	0.649751604
1.88	0.876829922
1.89999998	1.08769572
1.91999996	1.32777858
1.93999994	1.63037086
1.96000004	1.97510397
1.98000002	2.26173043
2	2.4155283
2.01999998	2.44477415
2.03999996	2.42157698
2.05999994	2.35481381
2.07999992	2.23950481
2.0999999	2.06994295
2.11999989	1.85360456
2.13999987	1.60435855
2.16000009	1.33692694
2.18000007	1.06211686
2.20000005	0.792931795
2.22000003	0.539643705
2.24000001	0.311478198
2.25999999	0.115871802
2.27999997	-0.0414334685
2.29999995	-0.155939385
2.31999993	-0.224314943
2.33999991	-0.244278699
2.3599999	-0.21393171
2.37999988	-0.130749926
2.4000001	0.00969106052
2.42000008	0.197909534
2.44000006	0.415314078
2.46000004	0.647653997
2.48000002	0.874225855
2.5	1.08577263
2.51999998	1.32645512
2.53999996	1.63148701
2.55999994	1.97876406
2.57999992	2.26615357
2.5999999	2.42015266
2.61999989	2.44946098
2.63999987	2.4260242
2.66000009	2.35872841
2.68000007	2.24277258
2.70000005	2.07232475
2.72000003	1.85487878
2.74000001	1.60454059
2.75999999	1.33582449
2.77999997	1.06013012
2.79999995	0.789952457
2.81999993	0.535850942
2.83999991	0.307145089
2.8599999	0.111451797
2.87999988	-0.0454209298
2.9000001	-0.159139454
2.92000008	-0.226477548
2.94000006	-0.244956329
2.96000004	-0.212758377
2.98000002	-0.12780486
3	0.0138554201
3.01999998	0.202794388
3.03999996	0.420488238
3.05999994	0.652754188
3.07999992	0.87919122
3.0999999	1.09154499
3.11999989	1.33278525
3.13999987	1.63929117
3.16000009	1.98820233
3.18000007	2.2768321
3.20000005	2.43259573
3.22000003	2.4638567
3.24000001	2.44232917
3.25999999	2.37648273
3.27999997	2.26145649
3.29999995	2.0916636
3.31999993	1.87484944
3.33999991	1.6249485
3.3599999	1.35651338
3.37999988	1.08098662
3.4000001	0.811058998
3.42000008	0.557031453
3.44000006	0.328120202
3.46000004	0.13177225
3.48000002	-0.0261533614
3.5	-0.14133805
3.51999998	-0.210530415
3.53999996	-0.231329352
3.55999994	-0.201685235
3.57999992	-0.119319469
3.5999999	0.0198722463
3.61999989	0.20668602
3.63999987	0.422542125
3.66000009	0.653211713
3.68000007	0.878837585
3.70000005	1.08982921
3.72000003	1.33074617
3.74000001	1.63706124
3.75999999	1.98580301
3.77999997	2.27407527
3.79999995	2.42925215
3.81999993	2.45989776
3.83999991	2.43725634
3.8599999	2.37069917
3.87999988	2.25515032
3.9000001	2.084975
3.92000008	1.86769652
3.94000006	1.61743152
3.96000004	1.34858143
3.98000002	1.07285213
4	0.802642941
4.01999998	0.548426092
4.03999996	0.319375306
4.05999994	0.12280935
4.07999992	-0.035405688
4.0999999	-0.150774539
4.11999989	-0.220070541
4.13999987	-0.241015121
4.15999985	-0.211540774
4.17999983	-0.129221156
4.19999981	0.0101834051
4.21999979	0.197270215
4.23999977	0.413430095
4.25999975	0.6442554
4.28000021	0.870376885
4.30000019	1.08209753
4.32000017	1.32366097
4.34000015	1.63070989
4.36000013	1.98004949
4.38000011	2.26819968
4.4000001	2.42260742
4.42000008	2.4522934
4.44000006	2.42897701
4.46000004	2.36184025
4.48000002	2.24574113
4.5	2.0753181
4.51999998	1.8580811
4.53999996	1.60792661
4.55999994	1.33927107
4.57999992	1.06379914
4.5999999	0.793915153
4.61999989	0.54011023
4.63999987	0.311485589
4.65999985	0.11529199
4.67999983	-0.0425282754
4.69999981	-0.157440931
4.71999979	-0.226109073
4.73999977	-0.246259332
4.75999975	-0.215781227
4.78000021	-0.132479861
4.80000019	0.00778301153
4.82000017	0.195612207
4.84000015	0.412223846
4.86000013	0.64329505
4.88000011	0.869422197
4.9000001	1.0814054
4.92000008	1.32272267
4.94000006	1.62922609
4.96000004	1.97802043
4.98000002	2.26597691
5	2.42124391
5.01999998	2.45283699
5.03999996	2.43158627
5.05999994	2.36634564
5.07999992	2.25185394
5.0999999	2.08269835
5.11999989	1.86609054
5.13999987	1.61647761
5.15999985	1.34805274
5.17999983	1.0725745
5.19999981	0.802767396
5.21999979	0.548927248
5.23999977	0.320264608
5.25999975	0.124116488
5.28000021	-0.0336108096
5.30000019	-0.148433805
5.32000017	-0.217141941
5.34000015	-0.237496614
5.36000013	-0.207374349
5.38000011	-0.124485947
5.4000001	0.0153847933
5.42000008	0.202749074
5.44000006	0.419002652
5.46000004	0.650027692
5.48000002	0.876002371
5.5	1.08774483
5.51999998	1.32865262
5.53999996	1.63518417
5.55999994	1.98421967
5.57999992	2.27219176
5.5999999	2.42673016
5.61999989	2.45665717
5.63999987	2.43369532
5.65999985	2.3669703
5.67999983	2.25112963
5.69999981	2.0807209
5.71999979	1.86313939
5.73999977	1.61266685
5.75999975	1.34352052
5.78000021	1.06759357
5.80000019	0.797274828
5.82000017	0.543085396
5.84000015	0.314143181
5.86000013	0.117798537
5.88000011	-0.0401363149
5.9000001	-0.155330196
5.92000008	-0.224480197
5.94000006	-0.245183006
5.96000004	-0.215196803
5.98000002	-0.132234901
6	0.00785477366
6.01999998	0.195574388
6.03999996	0.412150353
6.05999994	0.643521965
6.07999992	0.86981678
6.0999999	1.08178186
6.11999989	1.32277822
6.13999987	1.6294657
6.15999985	1.97860098
6.17999983	2.26674867
6.19999981	2.42131734
6.21999979	2.45111775
6.23999977	2.42763925
6.25999975	2.3602221
6.28000021	2.24374223
6.30000019	2.07276607
6.32000017	1.85479295
6.34000015	1.60393846
6.36000013	1.33445644
6.38000011	1.05810022
6.4000001	0.787521422
6.42000008	0.53310293
6.44000006	0.304044127
6.46000004	0.10769327
6.48000002	-0.0500468984
6.5	-0.164845586
6.51999998	-0.2333083
6.53999996	-0.253226757
6.55999994	-0.222578675
