# Supplementary material for: Universal Walking Control Framework of Biped Robot Based on Dynamic Model and Quadratic Programming
Source: Hindawi journal article supplement (doi:10.1155/2020/2789039), 2020-10-31
Supplement: f1 [file 2789039.f1.zip › sim/angle hip yaw]

0	0
0.0199999996	-0.336489469
0.0399999991	-0.349307656
0.0599999987	-0.379059643
0.0799999982	-0.467049718
0.099999994	-0.628058076
0.120000005	-0.85606271
0.140000001	-1.10898757
0.159999996	-1.31304145
0.179999992	-1.412184
0.200000003	-1.39995551
0.219999999	-1.30273712
0.239999995	-1.16479218
0.25999999	-1.03005981
0.280000001	-0.907606006
0.300000012	-0.795253277
0.320000023	-0.692621887
0.340000004	-0.596773565
0.360000014	-0.505367517
0.380000025	-0.418444932
0.400000006	-0.335866004
0.420000017	-0.259507209
0.439999998	-0.188344702
0.460000008	-0.125004843
0.480000019	-0.069775492
0.5	-0.0253642946
0.519999981	0.00615572883
0.539999962	0.0234384388
0.560000002	0.0250203833
0.579999983	0.00802157819
0.599999964	-0.0292103291
0.620000005	-0.0868477523
0.639999986	-0.157108605
0.659999967	-0.248272449
0.680000007	-0.398657322
0.699999988	-0.625159442
0.719999969	-0.907262564
0.74000001	-1.18680882
0.75999999	-1.3693434
0.779999971	-1.4049443
0.799999952	-1.31389832
0.819999993	-1.1485126
0.839999974	-0.959529221
0.859999955	-0.798776329
0.879999995	-0.674631357
0.899999976	-0.578028858
0.919999957	-0.498648793
0.939999998	-0.428007543
0.959999979	-0.360607862
0.979999959	-0.298876405
1	-0.236248702
1.01999998	-0.174200177
1.03999996	-0.113989003
1.05999994	-0.0574592613
1.07999992	-0.00837267842
1.10000002	0.0317137241
1.12	0.059860684
1.13999999	0.0729878396
1.15999997	0.0688785762
1.17999995	0.0451683328
1.19999993	0.000814838684
1.22000003	-0.0587111861
1.24000001	-0.119116955
1.25999999	-0.198738977
1.27999997	-0.356990606
1.29999995	-0.597266972
1.31999993	-0.900121808
1.34000003	-1.18395603
1.36000001	-1.32464564
1.38	-1.27836668
1.39999998	-1.10104144
1.41999996	-0.85940975
1.43999994	-0.645183384
1.46000004	-0.480288565
1.48000002	-0.359891117
1.5	-0.278588384
1.51999998	-0.230027005
1.53999996	-0.196715504
1.55999994	-0.167829141
1.57999992	-0.137105659
1.60000002	-0.101626582
1.62	-0.0607172474
1.63999999	-0.016993111
1.65999997	0.0262267254
1.67999995	0.0656014085
1.69999993	0.0964103565
1.72000003	0.115765534
1.74000001	0.119389758
1.75999999	0.105626285
1.77999997	0.0743720904
1.79999995	0.0318866298
1.81999993	-0.0298159942
1.84000003	-0.110407554
1.86000001	-0.201964423
1.88	-0.329504162
1.89999998	-0.57165122
1.91999996	-0.892076731
1.93999994	-1.21438849
1.96000004	-1.39987922
1.98000002	-1.36971974
2	-1.18607199
2.01999998	-0.93081373
2.03999996	-0.708678961
2.05999994	-0.536353827
2.07999992	-0.409792572
2.0999999	-0.323160589
2.11999989	-0.269040406
2.13999987	-0.230118781
2.16000009	-0.195703924
2.18000007	-0.160009861
2.20000005	-0.120544113
2.22000003	-0.0762017518
2.24000001	-0.0295621622
2.25999999	0.0166548826
2.27999997	0.0581118651
2.29999995	0.0905457288
2.31999993	0.110403225
2.33999991	0.114962608
2.3599999	0.101467058
2.37999988	0.0703215972
2.4000001	0.0262642968
2.42000008	-0.0378221832
2.44000006	-0.119264439
2.46000004	-0.212568358
2.48000002	-0.340079546
2.5	-0.58162725
2.51999998	-0.902338564
2.53999996	-1.22601008
2.55999994	-1.41132677
2.57999992	-1.3809514
2.5999999	-1.19685268
2.61999989	-0.941502094
2.63999987	-0.719306707
2.66000009	-0.54671818
2.68000007	-0.419766724
2.70000005	-0.332362503
2.72000003	-0.276863068
2.74000001	-0.236670241
2.75999999	-0.20035246
2.77999997	-0.164328545
2.79999995	-0.123424426
2.81999993	-0.0780105293
2.83999991	-0.0301880091
2.8599999	0.0167710315
2.87999988	0.0585477427
2.9000001	0.0915970281
2.92000008	0.111702584
2.94000006	0.115889341
2.96000004	0.101748496
2.98000002	0.0697349161
3	0.0241619274
3.01999998	-0.041743774
3.03999996	-0.125110328
3.05999994	-0.220364645
3.07999992	-0.350759655
3.0999999	-0.592005968
3.11999989	-0.91354835
3.13999987	-1.23738074
3.16000009	-1.4219501
3.18000007	-1.39032495
3.20000005	-1.20495677
3.22000003	-0.948535919
3.24000001	-0.725592613
3.25999999	-0.552456081
3.27999997	-0.425054491
3.29999995	-0.33724165
3.31999993	-0.281628966
3.33999991	-0.240818039
3.3599999	-0.203972325
3.37999988	-0.16684629
3.4000001	-0.126258776
3.42000008	-0.0811899453
3.44000006	-0.0340464115
3.46000004	0.0129206674
3.48000002	0.0546572059
3.5	0.0879529268
3.51999998	0.108689494
3.53999996	0.113273911
3.55999994	0.099612087
3.57999992	0.0678916648
3.5999999	0.0222877972
3.61999989	-0.0434845909
3.63999987	-0.126805753
3.66000009	-0.222103089
3.68000007	-0.350359976
3.70000005	-0.592576623
3.72000003	-0.913039505
3.74000001	-1.23620749
3.75999999	-1.4202441
3.77999997	-1.38880861
3.79999995	-1.20414162
3.81999993	-0.949137747
3.83999991	-0.726998329
3.8599999	-0.554620445
3.87999988	-0.427644938
3.9000001	-0.340201408
3.92000008	-0.284522772
3.94000006	-0.243932575
3.96000004	-0.206633821
3.98000002	-0.169740751
4	-0.128093138
4.01999998	-0.0824033543
4.03999996	-0.0344401821
4.05999994	0.0127163753
4.07999992	0.054811012
4.0999999	0.0883957371
4.11999989	0.109529741
4.13999987	0.11449828
4.15999985	0.10117317
4.17999983	0.0693627
4.19999981	0.0238680933
4.21999979	-0.0422510058
4.23999977	-0.126019627
4.25999975	-0.223725811
4.28000021	-0.351943523
4.30000019	-0.593657732
4.32000017	-0.91363728
4.34000015	-1.23689747
4.36000013	-1.42132914
4.38000011	-1.39027786
4.4000001	-1.2057929
4.42000008	-0.950814128
4.44000006	-0.728809714
4.46000004	-0.55640465
4.48000002	-0.428883493
4.5	-0.340982676
4.51999998	-0.28513521
4.53999996	-0.24408935
4.55999994	-0.206335202
4.57999992	-0.16899237
4.5999999	-0.126891077
4.61999989	-0.0810914263
4.63999987	-0.0326771587
4.65999985	0.0150150042
4.67999983	0.0574512109
4.69999981	0.090824008
4.71999979	0.111695573
4.73999977	0.116750054
4.75999975	0.103539586
4.78000021	0.0716950595
4.80000019	0.0260907784
4.82000017	-0.0398799106
4.84000015	-0.12375661
4.86000013	-0.221603751
4.88000011	-0.350048751
4.9000001	-0.591166735
4.92000008	-0.911697268
4.94000006	-1.23569441
4.96000004	-1.42039895
4.98000002	-1.38958836
5	-1.20533144
5.01999998	-0.950432777
5.03999996	-0.728051007
5.05999994	-0.555438697
5.07999992	-0.428004712
5.0999999	-0.340310395
5.11999989	-0.284145623
5.13999987	-0.243837252
5.15999985	-0.206244618
5.17999983	-0.168310478
5.19999981	-0.126907066
5.21999979	-0.0813527778
5.23999977	-0.0334922299
5.25999975	0.0137119936
5.28000021	0.0559214652
5.30000019	0.0893423855
5.32000017	0.110207163
5.34000015	0.114882663
5.36000013	0.101244815
5.38000011	0.0690309703
5.4000001	0.022948971
5.42000008	-0.0437292717
5.44000006	-0.128119782
5.46000004	-0.224308357
5.48000002	-0.353004158
5.5	-0.59393692
5.51999998	-0.914357245
5.53999996	-1.23852193
5.55999994	-1.42334735
5.57999992	-1.39240909
5.5999999	-1.20777452
5.61999989	-0.952107549
5.63999987	-0.729405046
5.65999985	-0.556657612
5.67999983	-0.428967595
5.69999981	-0.340834767
5.71999979	-0.284493774
5.73999977	-0.243803307
5.75999975	-0.205853775
5.78000021	-0.168372765
5.80000019	-0.126156256
5.82000017	-0.0802856907
5.84000015	-0.0320852697
5.86000013	0.0156576764
5.88000011	0.058396183
5.9000001	0.0920666233
5.92000008	0.113261923
5.94000006	0.118403867
5.96000004	0.105323575
5.98000002	0.0735052526
6	0.0276178624
6.01999998	-0.0387748852
6.03999996	-0.123147644
6.05999994	-0.219383612
6.07999992	-0.348137289
6.0999999	-0.589255095
6.11999989	-0.910338938
6.13999987	-1.23493445
6.15999985	-1.42029905
6.17999983	-1.38973892
6.19999981	-1.2056129
6.21999979	-0.950352967
6.23999977	-0.727870226
6.25999975	-0.555391431
6.28000021	-0.428115845
6.30000019	-0.340345383
6.32000017	-0.284359187
6.34000015	-0.243620366
6.36000013	-0.205536008
6.38000011	-0.167094037
6.4000001	-0.124723218
6.42000008	-0.0783278197
6.44000006	-0.0296493322
6.46000004	0.0180282518
6.48000002	0.0610458106
6.5	0.0949167162
6.51999998	0.116216667
6.53999996	0.121273115
6.55999994	0.107975975
