# Supplementary material for: Universal Walking Control Framework of Biped Robot Based on Dynamic Model and Quadratic Programming
Source: Hindawi journal article supplement (doi:10.1155/2020/2789039), 2020-10-31
Supplement: f1 [file 2789039.f1.zip › sim/angle knee pitch]

0	0
0.0199999996	21.0852947
0.0399999991	21.0681763
0.0599999987	21.561451
0.0799999982	23.6519356
0.099999994	27.370348
0.120000005	32.1381645
0.140000001	37.1160278
0.159999996	41.4210587
0.179999992	44.3001366
0.200000003	45.2192535
0.219999999	44.0717201
0.239999995	41.3820457
0.25999999	38.5611153
0.280000001	36.1224709
0.300000012	34.0167694
0.320000023	32.2666664
0.340000004	30.8038864
0.360000014	29.5723152
0.380000025	28.5261021
0.400000006	27.6278248
0.420000017	26.8446503
0.439999998	26.151825
0.460000008	25.5275898
0.480000019	24.9524632
0.5	24.4090729
0.519999981	23.8804359
0.539999962	23.349472
0.560000002	22.7979946
0.579999983	22.205862
0.599999964	21.5491238
0.620000005	20.7556992
0.639999986	19.8122425
0.659999967	19.4059277
0.680000007	21.069294
0.699999988	24.7366924
0.719999969	29.7157021
0.74000001	35.0233154
0.75999999	39.6097527
0.779999971	42.5664406
0.799999952	43.3021889
0.819999993	41.6585426
0.839999974	38.1795502
0.859999955	34.755394
0.879999995	32.086731
0.899999976	30.0557671
0.919999957	28.532114
0.939999998	27.3914967
0.959999979	26.5328388
0.979999959	25.8764095
1	25.3597832
1.01999998	24.9335918
1.03999996	24.5547161
1.05999994	24.1898136
1.07999992	23.8078308
1.10000002	23.3795319
1.12	22.8753204
1.13999999	22.2633591
1.15999997	21.5062332
1.17999995	20.5061226
1.19999993	19.2298584
1.22000003	17.3526173
1.24000001	14.5773773
1.25999999	12.4188089
1.27999997	13.7196274
1.29999995	17.7572174
1.31999993	23.4841003
1.34000003	29.6420918
1.36000001	34.8792191
1.38	38.0257339
1.39999998	38.3076134
1.41999996	35.266304
1.43999994	31.5575104
1.46000004	28.2541981
1.48000002	25.3242798
1.5	22.7100105
1.51999998	21.1896858
1.53999996	20.4447536
1.55999994	20.2019749
1.57999992	20.2662067
1.60000002	20.4992027
1.62	20.7989597
1.63999999	21.0836048
1.65999997	21.2501354
1.67999995	21.2603073
1.69999993	21.0498962
1.72000003	20.5458355
1.74000001	19.6539021
1.75999999	18.2291126
1.77999997	15.9919147
1.79999995	12.5570631
1.81999993	9.47939873
1.84000003	6.72421026
1.86000001	4.20621777
1.88	3.60995102
1.89999998	7.79264498
1.91999996	14.3194351
1.93999994	21.4448509
1.96000004	27.9456615
1.98000002	32.2405815
2	33.4416656
2.01999998	31.0732861
2.03999996	28.1808605
2.05999994	25.5581837
2.07999992	23.200922
2.0999999	21.0728493
2.11999989	19.9359531
2.13999987	19.49436
2.16000009	19.5307541
2.18000007	19.7954788
2.20000005	20.1943569
2.22000003	20.7067318
2.24000001	21.0958633
2.25999999	21.3858929
2.27999997	21.4756889
2.29999995	21.3364449
2.31999993	20.8987579
2.33999991	20.0719242
2.3599999	18.7190742
2.37999988	16.5814438
2.4000001	13.3330584
2.42000008	10.414731
2.44000006	7.79071093
2.46000004	5.39191008
2.48000002	4.786695
2.5	8.85617161
2.51999998	15.2692413
2.53999996	22.3419113
2.55999994	28.7471218
2.57999992	32.9653473
2.5999999	34.1109238
2.61999989	31.7224178
2.63999987	28.8273811
2.66000009	26.2067165
2.68000007	23.8526096
2.70000005	21.7272892
2.72000003	20.5743427
2.74000001	20.1079941
2.75999999	20.1161976
2.77999997	20.3524303
2.79999995	20.7239323
2.81999993	21.1356964
2.83999991	21.5129414
2.8599999	21.7926674
2.87999988	21.8758488
2.9000001	21.7311745
2.92000008	21.2898483
2.94000006	20.4630413
2.96000004	19.1167507
2.98000002	17.0009556
3	13.8151789
3.01999998	10.9487963
3.03999996	8.3662262
3.05999994	6.00325871
3.07999992	5.37587833
3.0999999	9.38516426
3.11999989	15.7389164
3.13999987	22.783987
3.16000009	29.13908
3.18000007	33.3168716
3.20000005	34.4315224
3.22000003	32.0247154
3.24000001	29.1160183
3.25999999	26.4823341
3.27999997	24.1157551
3.29999995	21.9786968
3.31999993	20.8105659
3.33999991	20.3282223
3.3599999	20.3205738
3.37999988	20.5422325
3.4000001	20.9006252
3.42000008	21.3674622
3.44000006	21.7251663
3.46000004	21.9880791
3.48000002	22.0563679
3.5	21.8996716
3.51999998	21.4488544
3.53999996	20.6152802
3.55999994	19.2654991
3.57999992	17.1508179
3.5999999	13.9774466
3.61999989	11.1208858
3.63999987	8.54553127
3.66000009	6.18842077
3.68000007	5.55615568
3.70000005	9.54668617
3.72000003	15.8823586
3.74000001	22.919096
3.75999999	29.2590618
3.77999997	33.4244843
3.79999995	34.5297737
3.81999993	32.1192818
3.83999991	29.2118015
3.8599999	26.5804615
3.87999988	24.2163467
3.9000001	22.0809116
3.92000008	20.9116211
3.94000006	20.4263649
3.96000004	20.4150753
3.98000002	20.6328316
4	20.9872303
4.01999998	21.5052357
4.03999996	21.8514919
4.05999994	22.1041126
4.07999992	22.1644669
4.0999999	22.0011024
4.11999989	21.5452633
4.13999987	20.7085209
4.15999985	19.3572617
4.17999983	17.2450142
4.19999981	14.0832853
4.21999979	11.2388954
4.23999977	8.67530441
4.25999975	6.33067846
4.28000021	5.697752
4.30000019	9.67611313
4.32000017	15.9992542
4.34000015	23.0301437
4.36000013	29.3592854
4.38000011	33.5154953
4.4000001	34.6139603
4.42000008	32.2010841
4.44000006	29.2934933
4.46000004	26.6632881
4.48000002	24.3018303
4.5	22.1697216
4.51999998	21.0006332
4.53999996	20.5141068
4.55999994	20.5005856
4.57999992	20.7155838
4.5999999	21.0667686
4.61999989	21.4596195
4.63999987	21.8185978
4.65999985	22.0812111
4.67999983	22.1491566
4.69999981	21.9919415
4.71999979	21.5410881
4.73999977	20.7084942
4.75999975	19.3617649
4.78000021	17.2551517
4.80000019	14.1035624
4.82000017	11.2685261
4.84000015	8.71382713
4.86000013	6.37805414
4.88000011	5.7465539
4.9000001	9.72070503
4.92000008	16.0392551
4.94000006	23.0680141
4.96000004	29.393343
4.98000002	33.5462952
5	34.6428337
5.01999998	32.2306213
5.03999996	29.3246326
5.05999994	26.6960526
5.07999992	24.3365116
5.0999999	22.2061081
5.11999989	21.0374451
5.13999987	20.5503902
5.15999985	20.5358219
5.17999983	20.7495689
5.19999981	21.0993366
5.21999979	21.4907379
5.23999977	21.8481083
5.25999975	22.1098042
5.28000021	22.1773624
5.30000019	22.0206509
5.32000017	21.5710773
5.34000015	20.7406273
5.36000013	19.397131
5.38000011	17.2964363
5.4000001	14.1572962
5.42000008	11.333643
5.44000006	8.7895689
5.46000004	6.46406651
5.48000002	5.8330245
5.5	9.79955578
5.51999998	16.1101074
5.53999996	23.135067
5.55999994	29.4534664
5.57999992	33.601696
5.5999999	34.6949539
5.61999989	32.2822685
5.63999987	29.376955
5.65999985	26.7488022
5.67999983	24.3887234
5.69999981	22.2577076
5.71999979	21.0866985
5.73999977	20.5968456
5.75999975	20.5795193
5.78000021	20.7905998
5.80000019	21.1380215
5.82000017	21.5273743
5.84000015	21.8835869
5.86000013	22.1442852
5.88000011	22.2105503
5.9000001	22.052702
5.92000008	21.602047
5.94000006	20.770649
5.96000004	19.4265728
5.98000002	17.325388
6	14.1863632
6.01999998	11.3618736
6.03999996	8.81591606
6.05999994	6.48799276
6.07999992	5.85403633
6.0999999	9.81787109
6.11999989	16.1259918
6.13999987	23.1498089
6.15999985	29.4661083
6.17999983	33.612175
6.19999981	34.703968
6.21999979	32.2908363
6.23999977	29.3859367
6.25999975	26.7586746
6.28000021	24.399725
6.30000019	22.2695465
6.32000017	21.0987263
6.34000015	20.608736
6.36000013	20.5911942
6.38000011	20.8019104
6.4000001	21.1490479
6.42000008	21.5383015
6.44000006	21.8945026
6.46000004	22.1556606
6.48000002	22.2230473
6.5	22.0661507
6.51999998	21.616785
6.53999996	20.786747
6.55999994	19.4439392
