# Supplementary material for: Universal Walking Control Framework of Biped Robot Based on Dynamic Model and Quadratic Programming
Source: Hindawi journal article supplement (doi:10.1155/2020/2789039), 2020-10-31
Supplement: f1 [file 2789039.f1.zip › sim/msr ankle pitch]

0.0199999996	0
0.0399999991	2.15380573e-15
0.0599999987	3.39543779e-12
0.0799999982	3.08535532e-12
0.099999994	7.1361324e-12
0.120000005	5.79876702e-10
0.140000001	5.67357661e-10
0.159999996	5.514183e-10
0.179999992	5.28608102e-10
0.200000003	5.02615061e-10
0.219999999	4.7957216e-10
0.239999995	4.60434607e-10
0.25999999	4.42619663e-10
0.280000001	4.27566926e-10
0.300000012	4.15437379e-10
0.320000023	4.04556111e-10
0.340000004	3.95835142e-10
0.360000014	3.8772302e-10
0.380000025	3.77913645e-10
0.400000006	3.72503695e-10
0.420000017	22.5331707
0.439999998	22.119627
0.460000008	24.1239166
0.480000019	26.3139076
0.5	27.7326164
0.519999981	29.3467731
0.539999962	31.2903824
0.560000002	32.5600128
0.579999983	33.3248672
0.599999964	34.0425301
0.620000005	34.2297668
0.639999986	33.8194199
0.659999967	34.5929985
0.680000007	34.5709686
0.699999988	34.0869751
0.719999969	33.6117058
0.74000001	33.1543808
0.75999999	32.7152328
0.779999971	32.2930832
0.799999952	31.8868637
0.819999993	31.4955997
0.839999974	31.1183929
0.859999955	30.7544231
0.879999995	30.4029312
0.899999976	30.0632229
0.919999957	29.7346535
0.939999998	29.4166279
0.959999979	29.1085911
0.979999959	28.8100338
1	28.5204792
1.01999998	29.0667267
1.03999996	46.5774193
1.05999994	48.1052094
1.07999992	49.2880554
1.10000002	49.5413933
1.12	49.2095528
1.13999999	49.0483322
1.15999997	49.195507
1.17999995	49.3977661
1.19999993	49.6986389
1.22000003	49.9596291
1.24000001	50.2935677
1.25999999	50.62537
1.27999997	50.4197121
1.29999995	50.0303726
1.31999993	49.64991
1.34000003	49.2779922
1.36000001	48.9143143
1.38	48.558567
1.39999998	48.2104721
1.41999996	47.8697586
1.43999994	47.5361671
1.46000004	47.2094536
1.48000002	46.889389
1.5	46.5757408
1.51999998	46.2683067
1.53999996	45.9668846
1.55999994	45.6712723
1.57999992	45.3812943
1.60000002	45.0967674
1.62	44.8175278
1.63999999	49.42239
1.65999997	49.8038063
1.67999995	49.5077095
1.69999993	49.3155708
1.72000003	49.0520554
1.74000001	48.8027191
1.75999999	48.5252953
1.77999997	48.2860146
1.79999995	48.3161774
1.81999993	48.050251
1.84000003	47.8436165
1.86000001	49.2104759
1.88	49.4255257
1.89999998	49.1707878
1.91999996	48.9140205
1.93999994	48.661232
1.96000004	48.412323
1.98000002	48.1671944
2	47.9257545
2.01999998	47.6879082
2.03999996	47.4535675
2.05999994	47.2226486
2.07999992	46.9950676
2.0999999	46.7707481
2.11999989	46.5496063
2.13999987	46.3315773
2.16000009	46.116581
2.18000007	45.9045486
2.20000005	45.6954155
2.22000003	45.4891129
2.24000001	47.6329498
2.25999999	47.9330978
2.27999997	47.7290535
2.29999995	47.5340385
2.31999993	47.3523903
2.33999991	47.1860657
2.3599999	46.9901161
2.37999988	46.8968544
2.4000001	46.9313011
2.42000008	46.7792587
2.44000006	47.2581253
2.46000004	47.8693657
2.48000002	48.035347
2.5	47.8465118
2.51999998	47.6562653
2.53999996	47.4682693
2.55999994	47.282486
2.57999992	47.0988617
2.5999999	46.9173622
2.61999989	46.7379456
2.63999987	46.5605736
2.66000009	46.3852005
2.68000007	46.2117996
2.70000005	46.0403252
2.72000003	45.8707466
2.74000001	45.7030296
2.75999999	45.5371361
2.77999997	45.3730392
2.79999995	45.210701
2.81999993	45.0500946
2.83999991	46.4702148
2.8599999	46.3291359
2.87999988	46.6522331
2.9000001	47.5578537
2.92000008	47.9063644
2.94000006	48.0279808
2.96000004	47.9251633
2.98000002	47.7987785
3	47.7602196
3.01999998	47.7724762
3.03999996	48.1002426
3.05999994	48.6182518
3.07999992	48.7663422
3.0999999	48.6117134
3.11999989	48.4556541
3.13999987	48.3010902
3.16000009	48.1479988
3.18000007	47.9963493
3.20000005	47.8461266
3.22000003	47.6973038
3.24000001	47.5498619
3.25999999	47.4037781
3.27999997	47.2590332
3.29999995	47.1156082
3.31999993	46.9734802
3.33999991	46.8326302
3.3599999	46.6930389
3.37999988	46.5546875
3.4000001	46.4175606
3.42000008	46.2816391
3.44000006	47.4617767
3.46000004	47.4279671
3.48000002	48.6879959
3.5	49.1095505
3.51999998	49.3626442
3.53999996	49.5654449
3.55999994	49.8750992
3.57999992	49.8401794
3.5999999	49.7170792
3.61999989	49.7704964
3.63999987	50.0886879
3.66000009	50.4782524
3.68000007	50.5842667
3.70000005	50.4498138
3.72000003	50.3140106
3.74000001	50.1793022
3.75999999	50.0456696
3.77999997	49.9130974
3.79999995	49.7815742
3.81999993	49.6510849
3.83999991	49.5216179
3.8599999	49.3931541
3.87999988	49.2656898
3.9000001	49.1392059
3.92000008	49.0136871
3.94000006	48.8891296
3.96000004	48.7655182
3.98000002	48.6428375
4	48.5210762
4.01999998	48.4002266
4.03999996	49.5303459
4.05999994	49.4332771
4.07999992	49.3206863
4.0999999	50.0191269
4.11999989	50.2665863
4.13999987	50.4355698
4.15999985	50.5175476
4.17999983	50.44104
4.19999981	50.3510094
4.21999979	50.2759438
4.23999977	50.5531731
4.25999975	50.8746338
4.28000021	50.9554596
4.30000019	50.8389587
4.32000017	50.7211418
4.34000015	50.6041374
4.36000013	50.4879379
4.38000011	50.3725357
4.4000001	50.2579231
4.42000008	50.1440887
4.44000006	50.0310249
4.46000004	49.9187202
4.48000002	49.8071709
4.5	49.6963654
4.51999998	49.5862961
4.53999996	49.4769554
4.55999994	49.3683319
4.57999992	49.2604218
4.5999999	49.1532173
4.61999989	49.046711
4.63999987	50.465889
4.65999985	50.417717
4.67999983	50.8166351
4.69999981	51.0092239
4.71999979	51.0639839
4.73999977	50.9563637
4.75999975	50.9666786
4.78000021	51.0292549
4.80000019	51.0709724
4.82000017	51.0026054
4.84000015	51.2479172
4.86000013	51.4723129
4.88000011	51.5565224
4.9000001	51.4534264
4.92000008	51.3487396
4.94000006	51.2446899
4.96000004	51.1412697
4.98000002	51.0384712
5	50.9362946
5.01999998	50.8347244
5.03999996	50.7337608
5.05999994	50.6334
5.07999992	50.5336266
5.0999999	50.4344444
5.11999989	50.3358459
5.13999987	50.2378197
5.15999985	50.1403656
5.17999983	50.0434761
5.19999981	49.9471436
5.21999979	49.851368
5.23999977	50.6364288
5.25999975	50.5637207
5.28000021	50.4732666
5.30000019	50.3780251
5.32000017	50.2834816
5.34000015	50.1892471
5.36000013	50.108284
5.38000011	50.0552521
5.4000001	50.0409508
5.42000008	49.9704742
5.44000006	50.159359
5.46000004	50.4245338
5.48000002	50.4903336
5.5	50.4001198
5.51999998	50.3087311
5.53999996	50.2178383
5.55999994	50.1274376
5.57999992	50.0375252
5.5999999	49.9480896
5.61999989	49.8591347
5.63999987	49.7706528
5.65999985	49.6826439
5.67999983	49.5950966
5.69999981	49.5080109
5.71999979	49.4213829
5.73999977	49.3352089
5.75999975	49.2494812
5.78000021	49.1641998
5.80000019	49.079361
5.82000017	48.9949608
5.84000015	50.307457
5.86000013	50.2524757
5.88000011	50.3808212
5.9000001	50.3936615
5.92000008	50.4947891
5.94000006	50.4788246
5.96000004	50.40625
5.98000002	50.3277931
6	50.3023872
6.01999998	50.2471695
6.03999996	50.407856
6.05999994	50.6433182
6.07999992	50.7057228
6.0999999	50.6255646
6.11999989	50.5427742
6.13999987	50.460392
6.15999985	50.3784103
6.17999983	50.2968254
6.19999981	50.2156334
6.21999979	50.1348381
6.23999977	50.0544281
6.25999975	49.9744034
6.28000021	49.8947639
6.30000019	49.8155022
6.32000017	49.736618
6.34000015	49.6581078
6.36000013	49.5799675
6.38000011	49.5021973
6.4000001	49.4247894
6.42000008	49.347744
6.44000006	50.5107918
6.46000004	50.548954
6.48000002	50.6043816
6.5	50.7003174
6.51999998	50.7617493
6.53999996	50.7561874
6.55999994	50.686615
