# Supplementary material for: Universal Walking Control Framework of Biped Robot Based on Dynamic Model and Quadratic Programming
Source: Hindawi journal article supplement (doi:10.1155/2020/2789039), 2020-10-31
Supplement: f1 [file 2789039.f1.zip › sim/msr ankle roll]

0.0199999996	0
0.0399999991	8.40387047e-17
0.0599999987	7.72133225e-12
0.0799999982	7.4077966e-12
0.099999994	1.97558619e-11
0.120000005	9.01475908e-11
0.140000001	8.38156627e-11
0.159999996	7.84497467e-11
0.179999992	7.40649278e-11
0.200000003	7.05327671e-11
0.219999999	6.7486669e-11
0.239999995	6.4684369e-11
0.25999999	6.21952975e-11
0.280000001	6.03171749e-11
0.300000012	5.84807341e-11
0.320000023	5.66453655e-11
0.340000004	5.50746324e-11
0.360000014	5.40570332e-11
0.380000025	5.3191871e-11
0.400000006	5.19463153e-11
0.420000017	16.4501896
0.439999998	19.6420727
0.460000008	19.8577576
0.480000019	20.0717411
0.5	19.6802006
0.519999981	19.3783836
0.539999962	19.482933
0.560000002	21.387188
0.579999983	21.8842983
0.599999964	21.7568207
0.620000005	21.8597145
0.639999986	24.2390671
0.659999967	24.144886
0.680000007	24.3429832
0.699999988	23.9942532
0.719999969	23.6590919
0.74000001	23.3371849
0.75999999	23.0280685
0.779999971	22.7309208
0.799999952	22.4449863
0.819999993	22.1695766
0.839999974	21.9040623
0.859999955	21.6478653
0.879999995	21.4004536
0.899999976	21.161335
0.919999957	20.9300575
0.939999998	20.7061996
0.959999979	20.4893742
0.979999959	20.2792225
1	20.0754051
1.01999998	20.3067036
1.03999996	20.1313133
1.05999994	21.6365128
1.07999992	23.0509224
1.10000002	24.5806255
1.12	24.9803295
1.13999999	25.333189
1.15999997	25.4536915
1.17999995	26.1812878
1.19999993	26.6861343
1.22000003	27.871994
1.24000001	28.9836521
1.25999999	30.1404171
1.27999997	30.2903423
1.29999995	30.0569038
1.31999993	29.828331
1.34000003	29.6048946
1.36000001	29.3864059
1.38	29.1726837
1.39999998	28.9635582
1.41999996	28.7588654
1.43999994	28.5584526
1.46000004	28.3621731
1.48000002	28.1698837
1.5	27.9814548
1.51999998	27.7967567
1.53999996	27.6156693
1.55999994	27.4380741
1.57999992	27.2638626
1.60000002	27.0929279
1.62	26.9251671
1.63999999	29.5287476
1.65999997	29.3911209
1.67999995	29.359951
1.69999993	29.6779385
1.72000003	30.1441326
1.74000001	30.2945938
1.75999999	30.8834858
1.77999997	31.0716305
1.79999995	31.0492802
1.81999993	31.0340881
1.84000003	30.9106922
1.86000001	30.7988834
1.88	30.6503582
1.89999998	30.4888821
1.91999996	30.32967
1.93999994	30.1729259
1.96000004	30.018589
1.98000002	29.8665943
2	29.7168865
2.01999998	29.5694065
2.03999996	29.4241028
2.05999994	29.2809181
2.07999992	29.1398048
2.0999999	29.0007114
2.11999989	28.8635921
2.13999987	28.7283974
2.16000009	28.5950871
2.18000007	28.4636154
2.20000005	28.3339386
2.22000003	28.2060204
2.24000001	29.2204628
2.25999999	29.6830463
2.27999997	29.9810619
2.29999995	30.4891605
2.31999993	30.4466724
2.33999991	30.4048328
2.3599999	30.3276558
2.37999988	30.2308369
2.4000001	30.1339359
2.42000008	30.0407772
2.44000006	29.9238586
2.46000004	29.8049755
2.48000002	29.6862106
2.5	29.5672951
2.51999998	29.4497318
2.53999996	29.333559
2.55999994	29.21875
2.57999992	29.105278
2.5999999	28.9931183
2.61999989	28.882246
2.63999987	28.7726345
2.66000009	28.6642628
2.68000007	28.557106
2.70000005	28.4511433
2.72000003	28.3463497
2.74000001	28.2427063
2.75999999	28.140192
2.77999997	28.0387859
2.79999995	27.9384689
2.81999993	27.83922
2.83999991	29.0716801
2.8599999	29.7799683
2.87999988	29.7098503
2.9000001	30.0037098
2.92000008	30.3297901
2.94000006	30.6585255
2.96000004	31.0185719
2.98000002	31.0751553
3	31.3663158
3.01999998	31.4756184
3.03999996	31.4537716
3.05999994	31.4056587
3.07999992	31.3144875
3.0999999	31.2134762
3.11999989	31.1132717
3.13999987	31.0140266
3.16000009	30.9157257
3.18000007	30.8183537
3.20000005	30.7218952
3.22000003	30.6263371
3.24000001	30.5316639
3.25999999	30.4378643
3.27999997	30.3449249
3.29999995	30.2528305
3.31999993	30.1615696
3.33999991	30.0711308
3.3599999	29.9814987
3.37999988	29.8926659
3.4000001	29.8046169
3.42000008	29.7173405
3.44000006	29.6809292
3.46000004	30.465395
3.48000002	30.5252209
3.5	30.6654301
3.51999998	30.7282467
3.53999996	30.7557182
3.55999994	30.7511749
3.57999992	30.8418865
3.5999999	31.1040668
3.61999989	31.0193634
3.63999987	30.9462471
3.66000009	30.8659344
3.68000007	30.7819996
3.70000005	30.6988029
3.72000003	30.616169
3.74000001	30.5341969
3.75999999	30.4528809
3.77999997	30.3722115
3.79999995	30.2921791
3.81999993	30.2127762
3.83999991	30.1339951
3.8599999	30.0558262
3.87999988	29.9782619
3.9000001	29.9012966
3.92000008	29.8249187
3.94000006	29.7491264
3.96000004	29.6739063
3.98000002	29.5992546
4	29.5251637
4.01999998	29.4516258
4.03999996	29.8180943
4.05999994	30.2384434
4.07999992	30.2812119
4.0999999	30.2814884
4.11999989	30.2871857
4.13999987	30.2472458
4.15999985	30.1744785
4.17999983	30.1479321
4.19999981	30.0823956
4.21999979	30.1293869
4.23999977	30.0678997
4.25999975	30.0046558
4.28000021	29.936779
4.30000019	29.8671627
4.32000017	29.797945
4.34000015	29.729208
4.36000013	29.6609421
4.38000011	29.5931473
4.4000001	29.5258121
4.42000008	29.4589367
4.44000006	29.3925133
4.46000004	29.3265362
4.48000002	29.2610016
4.5	29.1959057
4.51999998	29.1312408
4.53999996	29.0670033
4.55999994	29.003191
4.57999992	28.9397964
4.5999999	28.8768139
4.61999989	28.8142433
4.63999987	28.8652115
4.65999985	29.2994633
4.67999983	29.4222584
4.69999981	29.4051533
4.71999979	29.5200653
4.73999977	29.5778255
4.75999975	29.5702629
4.78000021	29.5561695
4.80000019	29.5760555
4.82000017	29.5730038
4.84000015	29.5700378
4.86000013	29.5570793
4.88000011	29.5684261
4.9000001	29.508049
4.92000008	29.4480133
4.94000006	29.38834
4.96000004	29.329031
4.98000002	29.2700768
5	29.2114792
5.01999998	29.1532307
5.03999996	29.0953293
5.05999994	29.0377712
5.07999992	28.9805546
5.0999999	28.9236736
5.11999989	28.8671265
5.13999987	28.8109112
5.15999985	28.755022
5.17999983	28.6994553
5.19999981	28.6442108
5.21999979	28.5892849
5.23999977	29.0091553
5.25999975	29.0293884
5.28000021	29.1279278
5.30000019	29.2602673
5.32000017	29.3238239
5.34000015	29.4354229
5.36000013	29.555584
5.38000011	29.6609821
5.4000001	29.7554131
5.42000008	29.8610725
5.44000006	29.894577
5.46000004	29.9079514
5.48000002	29.8825836
5.5	29.828331
5.51999998	29.7742462
5.53999996	29.7204533
5.55999994	29.6669502
5.57999992	29.6137371
5.5999999	29.5608082
5.61999989	29.5081615
5.63999987	29.4557953
5.65999985	29.4037075
5.67999983	29.3518944
5.69999981	29.3003559
5.71999979	29.2490864
5.73999977	29.1980839
5.75999975	29.1473503
5.78000021	29.0968781
5.80000019	29.0466671
5.82000017	28.9967155
5.84000015	29.3079395
5.86000013	29.365181
5.88000011	29.5110912
5.9000001	29.4719086
5.92000008	29.5118256
5.94000006	29.5602665
5.96000004	29.654705
5.98000002	29.764267
6	29.8697796
6.01999998	29.9818592
6.03999996	30.0124569
6.05999994	30.0445709
6.07999992	30.0397987
6.0999999	29.9911556
6.11999989	29.9421101
6.13999987	29.8933048
6.15999985	29.8447361
6.17999983	29.7964058
6.19999981	29.7483082
6.21999979	29.7004414
6.23999977	29.6528072
6.25999975	29.6054001
6.28000021	29.5582199
6.30000019	29.5112648
6.32000017	29.4645329
6.34000015	29.4180222
6.36000013	29.3717308
6.38000011	29.3256588
6.4000001	29.2798004
6.42000008	29.2341576
6.44000006	29.6567039
6.46000004	29.6200962
6.48000002	29.6001644
6.5	29.6255207
6.51999998	29.5892601
6.53999996	29.5938034
6.55999994	29.610323
