# Supplementary material for: Universal Walking Control Framework of Biped Robot Based on Dynamic Model and Quadratic Programming
Source: Hindawi journal article supplement (doi:10.1155/2020/2789039), 2020-10-31
Supplement: f1 [file 2789039.f1.zip › sim/msr hip pitch]

0.0199999996	0
0.0399999991	6.30068898e-05
0.0599999987	0.0770771131
0.0799999982	1.85277236
0.099999994	5.75298023
0.120000005	27.1174488
0.140000001	27.2230492
0.159999996	26.5069313
0.179999992	25.2478466
0.200000003	23.9531422
0.219999999	23.0776405
0.239999995	22.5113964
0.25999999	21.8295002
0.280000001	21.0687103
0.300000012	20.5376644
0.320000023	20.0676174
0.340000004	19.6596317
0.360000014	19.3123646
0.380000025	18.8593521
0.400000006	18.5113163
0.420000017	19.1945724
0.439999998	24.0093689
0.460000008	25.1035156
0.480000019	25.1049023
0.5	24.6093311
0.519999981	24.482811
0.539999962	24.5666161
0.560000002	24.9109173
0.579999983	24.6757088
0.599999964	24.3341236
0.620000005	23.9839458
0.639999986	23.6118393
0.659999967	23.3480606
0.680000007	23.1879177
0.699999988	23.5827732
0.719999969	24.2717838
0.74000001	26.0734501
0.75999999	27.3873043
0.779999971	28.2869091
0.799999952	28.2113457
0.819999993	27.8757153
0.839999974	27.6447296
0.859999955	27.5208721
0.879999995	27.2452812
0.899999976	26.9427338
0.919999957	26.6483345
0.939999998	26.3643436
0.959999979	26.0905437
0.979999959	25.8389568
1	25.8906116
1.01999998	26.5465736
1.03999996	38.994236
1.05999994	43.2288437
1.07999992	45.1484032
1.10000002	45.4051628
1.12	45.0013962
1.13999999	44.8148613
1.15999997	44.8024635
1.17999995	44.5346184
1.19999993	44.2618561
1.22000003	43.9512825
1.24000001	43.6327858
1.25999999	43.3817711
1.27999997	43.2308693
1.29999995	43.1666298
1.31999993	43.2524681
1.34000003	43.2891731
1.36000001	44.4756699
1.38	45.0046539
1.39999998	45.0016022
1.41999996	44.7151604
1.43999994	44.4579659
1.46000004	44.2074013
1.48000002	43.9295044
1.5	43.6450005
1.51999998	43.3613586
1.53999996	43.0790749
1.55999994	42.8108788
1.57999992	42.5655251
1.60000002	42.5316963
1.62	42.5089684
1.63999999	42.2491417
1.65999997	44.937767
1.67999995	47.290863
1.69999993	47.5508461
1.72000003	47.3193474
1.74000001	47.1680527
1.75999999	46.9312057
1.77999997	46.722599
1.79999995	46.5830994
1.81999993	46.3676643
1.84000003	46.1192093
1.86000001	45.8760605
1.88	45.7053413
1.89999998	46.0515709
1.91999996	46.302784
1.93999994	46.1764603
1.96000004	47.3967972
1.98000002	48.3566284
2	48.550518
2.01999998	48.3155823
2.03999996	48.1874008
2.05999994	48.0295219
2.07999992	47.8620682
2.0999999	47.6774559
2.11999989	47.4696274
2.13999987	47.2541161
2.16000009	47.0452995
2.18000007	46.8709412
2.20000005	46.827961
2.22000003	46.8160095
2.24000001	46.6134987
2.25999999	47.5113983
2.27999997	49.3450813
2.29999995	49.7752953
2.31999993	49.5812683
2.33999991	49.3704376
2.3599999	49.1954575
2.37999988	49.0853462
2.4000001	49.0089493
2.42000008	48.8684196
2.44000006	48.6774788
2.46000004	48.4805946
2.48000002	48.3348274
2.5	48.4954109
2.51999998	48.6524773
2.53999996	48.5368042
2.55999994	49.4710426
2.57999992	50.0508499
2.5999999	50.150425
2.61999989	49.9615326
2.63999987	49.8333588
2.66000009	49.7011795
2.68000007	49.564579
2.70000005	49.4042625
2.72000003	49.2374573
2.74000001	49.0623245
2.75999999	48.8918343
2.77999997	48.7470436
2.79999995	48.7048836
2.81999993	48.6812477
2.83999991	48.5614586
2.8599999	49.6168976
2.87999988	51.312809
2.9000001	52.9076271
2.92000008	52.8300323
2.94000006	52.6697731
2.96000004	52.5072517
2.98000002	52.353447
3	52.2440491
3.01999998	52.1403046
3.03999996	51.9814072
3.05999994	51.8128128
3.07999992	51.6882362
3.0999999	51.7891731
3.11999989	51.8859329
3.13999987	51.8585014
3.16000009	52.2403717
3.18000007	52.7393188
3.20000005	52.7865753
3.22000003	52.6270752
3.24000001	52.4815559
3.25999999	52.3499451
3.27999997	52.2242393
3.29999995	52.0909767
3.31999993	51.946949
3.33999991	51.797348
3.3599999	51.6491508
3.37999988	51.5191956
3.4000001	51.4877625
3.42000008	51.4527359
3.44000006	51.3088303
3.46000004	52.097847
3.48000002	53.7759247
3.5	54.3598824
3.51999998	54.3219528
3.53999996	54.1739388
3.55999994	54.0226288
3.57999992	53.880127
3.5999999	53.7518158
3.61999989	53.6078606
3.63999987	53.4722748
3.66000009	53.3264084
3.68000007	53.2214851
3.70000005	53.2967377
3.72000003	53.3666306
3.74000001	53.2566681
3.75999999	53.8089981
3.77999997	54.1717911
3.79999995	54.2297668
3.81999993	54.0980034
3.83999991	53.9987183
3.8599999	53.8909416
3.87999988	53.7710495
3.9000001	53.6456909
3.92000008	53.5166359
3.94000006	53.3863029
3.96000004	53.2559319
3.98000002	53.1418343
4	53.0892105
4.01999998	53.0524025
4.03999996	52.9536514
4.05999994	54.172554
4.07999992	54.9926834
4.0999999	55.4074593
4.11999989	55.3803215
4.13999987	55.2467651
4.15999985	55.1138611
4.17999983	54.9910202
4.19999981	54.9145355
4.21999979	54.8224068
4.23999977	54.7056732
4.25999975	54.5776978
4.28000021	54.482502
4.30000019	54.5400314
4.32000017	54.5929184
4.34000015	54.5150681
4.36000013	54.9321938
4.38000011	55.2359276
4.4000001	55.2649536
4.42000008	55.1423454
4.44000006	55.0525856
4.46000004	54.9629097
4.48000002	54.862484
4.5	54.7526169
4.51999998	54.6395149
4.53999996	54.522316
4.55999994	54.4063835
4.57999992	54.3033104
4.5999999	54.2533607
4.61999989	54.2169151
4.63999987	54.1706924
4.65999985	55.5299034
4.67999983	56.8851967
4.69999981	57.0298729
4.71999979	56.9477425
4.73999977	56.850193
4.75999975	56.7914009
4.78000021	56.7224197
4.80000019	56.6630516
4.82000017	56.5650978
4.84000015	56.4550247
4.86000013	56.3407402
4.88000011	56.2576103
4.9000001	56.3165169
4.92000008	56.3543701
4.94000006	56.2825203
4.96000004	56.4840965
4.98000002	56.8163719
5	56.8766327
5.01999998	56.7651329
5.03999996	56.6823235
5.05999994	56.5882492
5.07999992	56.4977074
5.0999999	56.3995018
5.11999989	56.2931824
5.13999987	56.1866798
5.15999985	56.0810928
5.17999983	55.9873619
5.19999981	55.9404678
5.21999979	55.9027405
5.23999977	55.8033943
5.25999975	56.4294243
5.28000021	57.0352631
5.30000019	57.1198578
5.32000017	57.0556107
5.34000015	56.9618149
5.36000013	56.8818474
5.38000011	56.8097382
5.4000001	56.7439766
5.42000008	56.6629257
5.44000006	56.5639534
5.46000004	56.4610901
5.48000002	56.3809891
5.5	56.4182396
5.51999998	56.4514389
5.53999996	56.3794937
5.55999994	56.7074394
5.57999992	56.9933586
5.5999999	56.9783401
5.61999989	56.8788872
5.63999987	56.8066292
5.65999985	56.7281456
5.67999983	56.6438789
5.69999981	56.5542221
5.71999979	56.4597168
5.73999977	56.3643036
5.75999975	56.2693214
5.78000021	56.1851959
5.80000019	56.1411972
5.82000017	56.1068192
5.84000015	56.0684433
5.86000013	56.8862762
5.88000011	57.70924
5.9000001	57.8312721
5.92000008	57.7846718
5.94000006	57.6934166
5.96000004	57.6075325
5.98000002	57.5332451
6	57.4676552
6.01999998	57.3929939
6.03999996	57.3031769
6.05999994	57.2092361
6.07999992	57.1349945
6.0999999	57.2379913
6.11999989	57.2648468
6.13999987	57.2053375
6.15999985	57.4693451
6.17999983	57.7114143
6.19999981	57.7370186
6.21999979	57.6458855
6.23999977	57.5767326
6.25999975	57.5062294
6.28000021	57.4295502
6.30000019	57.3470459
6.32000017	57.2614594
6.34000015	57.173027
6.36000013	57.0858612
6.38000011	57.0079803
6.4000001	56.9694023
6.42000008	56.9362488
6.44000006	56.899559
6.46000004	57.4616356
6.48000002	58.1838264
6.5	58.3499832
6.51999998	58.3110085
6.53999996	58.2225227
6.55999994	58.1417351
