# Supplementary material for: Universal Walking Control Framework of Biped Robot Based on Dynamic Model and Quadratic Programming
Source: Hindawi journal article supplement (doi:10.1155/2020/2789039), 2020-10-31
Supplement: f1 [file 2789039.f1.zip › sim/msr hip roll]

0.0199999996	0
0.0399999991	4.33610836e-07
0.0599999987	1.08928096
0.0799999982	1.12294924
0.099999994	1.10669684
0.120000005	4.33991623
0.140000001	4.29914379
0.159999996	4.13246632
0.179999992	3.90568924
0.200000003	3.70927596
0.219999999	3.54628968
0.239999995	3.39561701
0.25999999	3.27097583
0.280000001	3.19483805
0.300000012	3.12360072
0.320000023	3.04343128
0.340000004	2.96808243
0.360000014	2.8940742
0.380000025	2.81859207
0.400000006	2.75575948
0.420000017	8.6993227
0.439999998	19.4032803
0.460000008	22.7069302
0.480000019	24.7697926
0.5	25.4785862
0.519999981	25.959383
0.539999962	27.5012074
0.560000002	28.9753513
0.579999983	30.1223526
0.599999964	32.203331
0.620000005	33.1475716
0.639999986	35.5095558
0.659999967	36.1098518
0.680000007	36.3385887
0.699999988	35.8166428
0.719999969	35.3179359
0.74000001	34.8478928
0.75999999	34.4066925
0.779999971	33.9856834
0.799999952	33.5629807
0.819999993	33.1523819
0.839999974	32.7593575
0.859999955	32.3769531
0.879999995	32.0082779
0.899999976	31.6530724
0.919999957	31.3109341
0.939999998	30.9794998
0.959999979	30.6567249
0.979999959	30.3422966
1	30.0383339
1.01999998	29.7512817
1.03999996	35.9912338
1.05999994	36.7682343
1.07999992	37.6481934
1.10000002	38.8305321
1.12	39.1806259
1.13999999	39.4604607
1.15999997	39.7225494
1.17999995	40.3955116
1.19999993	41.0006256
1.22000003	41.8028412
1.24000001	42.701561
1.25999999	43.4861336
1.27999997	43.3579597
1.29999995	43.036171
1.31999993	42.7092361
1.34000003	42.4307976
1.36000001	42.1176529
1.38	41.815464
1.39999998	41.5225334
1.41999996	41.2716904
1.43999994	41.0040741
1.46000004	40.7254295
1.48000002	40.4494133
1.5	40.1789932
1.51999998	39.9139862
1.53999996	39.6543541
1.55999994	39.3994026
1.57999992	39.1492615
1.60000002	38.9055405
1.62	38.6651726
1.63999999	40.1913681
1.65999997	40.9458923
1.67999995	41.4502525
1.69999993	41.9275665
1.72000003	42.3260078
1.74000001	42.4748535
1.75999999	43.0190964
1.77999997	43.4259377
1.79999995	43.7551117
1.81999993	44.1530075
1.84000003	44.04142
1.86000001	44.4021912
1.88	44.3286629
1.89999998	44.1081238
1.91999996	43.8795624
1.93999994	43.6685524
1.96000004	43.4499321
1.98000002	43.2511215
2	43.0344849
2.01999998	42.8258858
2.03999996	42.6190567
2.05999994	42.412426
2.07999992	42.2097054
2.0999999	42.0092163
2.11999989	41.8114815
2.13999987	41.6159935
2.16000009	41.4229279
2.18000007	41.2324905
2.20000005	41.0450897
2.22000003	40.8604126
2.24000001	42.5563126
2.25999999	44.3106155
2.27999997	44.4953957
2.29999995	44.8823166
2.31999993	45.0739822
2.33999991	45.097393
2.3599999	45.2113762
2.37999988	45.3653908
2.4000001	45.580265
2.42000008	45.8758316
2.44000006	45.9219208
2.46000004	45.9698486
2.48000002	45.8666801
2.5	45.6833153
2.51999998	45.5028763
2.53999996	45.3399658
2.55999994	45.1637688
2.57999992	44.9911499
2.5999999	44.820797
2.61999989	44.6511803
2.63999987	44.482769
2.66000009	44.3159103
2.68000007	44.1510811
2.70000005	43.9877548
2.72000003	43.826664
2.74000001	43.667263
2.75999999	43.5088005
2.77999997	43.3520279
2.79999995	43.1971664
2.81999993	43.0441666
2.83999991	42.8924942
2.8599999	44.6252289
2.87999988	44.4870834
2.9000001	45.0413895
2.92000008	45.400383
2.94000006	45.792572
2.96000004	46.3256531
2.98000002	46.556427
3	46.765007
3.01999998	46.9904938
3.03999996	47.0192223
3.05999994	47.0983124
3.07999992	47.0410156
3.0999999	46.8895721
3.11999989	46.7399635
3.13999987	46.592804
3.16000009	46.4645195
3.18000007	46.3298721
3.20000005	46.1901207
3.22000003	46.0473061
3.24000001	45.9056664
3.25999999	45.7651062
3.27999997	45.6257324
3.29999995	45.4886627
3.31999993	45.3532791
3.33999991	45.2176628
3.3599999	45.0828857
3.37999988	44.9493752
3.4000001	44.8176117
3.42000008	44.6867256
3.44000006	45.1371574
3.46000004	45.8895836
3.48000002	46.0468597
3.5	46.3874779
3.51999998	46.4677429
3.53999996	46.5849762
3.55999994	46.7201462
3.57999992	46.7976418
3.5999999	47.073822
3.61999989	47.1778259
3.63999987	47.2138214
3.66000009	47.2498245
3.68000007	47.1898613
3.70000005	47.0624657
3.72000003	46.9365501
3.74000001	46.8166466
3.75999999	46.6969872
3.77999997	46.582756
3.79999995	46.4619827
3.81999993	46.3405724
3.83999991	46.2197647
3.8599999	46.0999374
3.87999988	45.9819908
3.9000001	45.8646584
3.92000008	45.7483139
3.94000006	45.632122
3.96000004	45.5173569
3.98000002	45.4028969
4	45.2894135
4.01999998	45.176899
4.03999996	46.5412788
4.05999994	46.9436989
4.07999992	46.9510574
4.0999999	47.054287
4.11999989	47.1985664
4.13999987	47.275322
4.15999985	47.2644043
4.17999983	47.3846893
4.19999981	47.4830627
4.21999979	47.4947433
4.23999977	47.5327072
4.25999975	47.5641136
4.28000021	47.5110893
4.30000019	47.4008179
4.32000017	47.2916336
4.34000015	47.1994591
4.36000013	47.0923805
4.38000011	46.9852524
4.4000001	46.8789902
4.42000008	46.7741432
4.44000006	46.6687584
4.46000004	46.5643425
4.48000002	46.4606438
4.5	46.357563
4.51999998	46.2556
4.53999996	46.1536598
4.55999994	46.0526161
4.57999992	45.951992
4.5999999	45.8521347
4.61999989	45.7530212
4.63999987	46.6483231
4.65999985	46.9521446
4.67999983	46.9738235
4.69999981	47.109169
4.71999979	47.3062706
4.73999977	47.4020081
4.75999975	47.4716759
4.78000021	47.547451
4.80000019	47.6724281
4.82000017	47.7776604
4.84000015	47.8159103
4.86000013	47.8303375
4.88000011	47.7929192
4.9000001	47.6964073
4.92000008	47.5999947
4.94000006	47.5143166
4.96000004	47.4682541
4.98000002	47.3732605
5	47.2846336
5.01999998	47.195652
5.03999996	47.1052971
5.05999994	47.012188
5.07999992	46.9202423
5.0999999	46.8284912
5.11999989	46.7371597
5.13999987	46.6462402
5.15999985	46.5557861
5.17999983	46.4658203
5.19999981	46.3765564
5.21999979	46.2878494
5.23999977	46.9119568
5.25999975	46.9934387
5.28000021	47.0997543
5.30000019	47.2968178
5.32000017	47.3384781
5.34000015	47.3768272
5.36000013	47.4851379
5.38000011	47.6026115
5.4000001	47.7450676
5.42000008	47.9017181
5.44000006	47.9365387
5.46000004	47.9815979
5.48000002	47.9507217
5.5	47.8639221
5.51999998	47.7776451
5.53999996	47.7006531
5.55999994	47.6198463
5.57999992	47.5344276
5.5999999	47.4507751
5.61999989	47.3668594
5.63999987	47.2831535
5.65999985	47.2000237
5.67999983	47.1172066
5.69999981	47.0345154
5.71999979	46.9525146
5.73999977	46.8706627
5.75999975	46.7892227
5.78000021	46.7082138
5.80000019	46.6277466
5.82000017	46.5477524
5.84000015	46.9957886
5.86000013	47.2970047
5.88000011	47.3441963
5.9000001	47.3426132
5.92000008	47.4523201
5.94000006	47.4788132
5.96000004	47.56707
5.98000002	47.6855164
6	47.8209724
6.01999998	47.9603233
6.03999996	47.9844856
6.05999994	48.0201111
6.07999992	48.0025215
6.0999999	47.9254036
6.11999989	47.8474922
6.13999987	47.7772675
6.15999985	47.7022972
6.17999983	47.6257362
6.19999981	47.5495186
6.21999979	47.4744682
6.23999977	47.3983345
6.25999975	47.3225594
6.28000021	47.2472115
6.30000019	47.172287
6.32000017	47.0980873
6.34000015	47.0237846
6.36000013	46.9498711
6.38000011	46.8762474
6.4000001	46.8032188
6.42000008	46.7304344
6.44000006	47.077404
6.46000004	47.1820488
6.48000002	47.2579613
6.5	47.2511368
6.51999998	47.3096848
6.53999996	47.3846703
6.55999994	47.4479828
