# Supplementary material for: Universal Walking Control Framework of Biped Robot Based on Dynamic Model and Quadratic Programming
Source: Hindawi journal article supplement (doi:10.1155/2020/2789039), 2020-10-31
Supplement: f1 [file 2789039.f1.zip › sim/msr hip yaw]

0.0199999996	0
0.0399999991	1.05438221e-06
0.0599999987	0.0272680931
0.0799999982	0.0791386068
0.099999994	0.328132421
0.120000005	1.11005652
0.140000001	1.19927561
0.159999996	1.201841
0.179999992	1.13331437
0.200000003	1.19058812
0.219999999	1.40004492
0.239999995	1.60846066
0.25999999	1.69507754
0.280000001	1.65892601
0.300000012	1.60287344
0.320000023	1.55535913
0.340000004	1.513834
0.360000014	1.47650898
0.380000025	1.44050276
0.400000006	1.40919662
0.420000017	1.97657287
0.439999998	4.49059629
0.460000008	5.61217403
0.480000019	6.48936176
0.5	6.46083498
0.519999981	6.39808559
0.539999962	6.35983038
0.560000002	6.31705236
0.579999983	6.41079473
0.599999964	6.45686436
0.620000005	6.56801224
0.639999986	6.6604495
0.659999967	6.97789145
0.680000007	6.99295187
0.699999988	6.91368961
0.719999969	6.82009888
0.74000001	6.7273941
0.75999999	6.63946962
0.779999971	6.55394363
0.799999952	6.47188187
0.819999993	6.39794922
0.839999974	6.32144165
0.859999955	6.25231314
0.879999995	6.18434858
0.899999976	6.12109375
0.919999957	6.05997467
0.939999998	5.99804497
0.959999979	5.93571663
0.979999959	5.87490034
1	5.81725788
1.01999998	5.76811266
1.03999996	5.78053665
1.05999994	5.75340843
1.07999992	5.70290279
1.10000002	5.98190308
1.12	6.49770355
1.13999999	6.44509029
1.15999997	6.4011755
1.17999995	6.39086962
1.19999993	6.50428581
1.22000003	6.65985918
1.24000001	6.94536972
1.25999999	7.18269825
1.27999997	7.1669383
1.29999995	7.11476898
1.31999993	7.06088781
1.34000003	7.00874043
1.36000001	6.95921326
1.38	6.91209555
1.39999998	6.880054
1.41999996	6.83312702
1.43999994	6.79187965
1.46000004	6.74675894
1.48000002	6.70160913
1.5	6.6567874
1.51999998	6.61284971
1.53999996	6.56977701
1.55999994	6.5275836
1.57999992	6.4861412
1.60000002	6.44769716
1.62	6.41094065
1.63999999	6.71379852
1.65999997	7.50994062
1.67999995	7.86261082
1.69999993	8.08649921
1.72000003	8.09925079
1.74000001	8.22006989
1.75999999	8.21162605
1.77999997	8.21828747
1.79999995	8.24115849
1.81999993	8.19654846
1.84000003	8.18800545
1.86000001	8.17956734
1.88	8.17685413
1.89999998	8.13632965
1.91999996	8.0938673
1.93999994	8.05912876
1.96000004	8.02094078
1.98000002	7.99190712
2	7.95296431
2.01999998	7.91467237
2.03999996	7.87662172
2.05999994	7.83835268
2.07999992	7.80205202
2.0999999	7.76636362
2.11999989	7.73077488
2.13999987	7.69458771
2.16000009	7.65894413
2.18000007	7.62389612
2.20000005	7.58954573
2.22000003	7.55806112
2.24000001	7.52914715
2.25999999	8.71677113
2.27999997	8.91572857
2.29999995	8.92583656
2.31999993	9.55143833
2.33999991	10.7228403
2.3599999	10.7562141
2.37999988	10.7890148
2.4000001	10.8197041
2.42000008	10.7977448
2.44000006	10.771389
2.46000004	10.7502575
2.48000002	10.7167234
2.5	10.6773939
2.51999998	10.6349554
2.53999996	10.6051359
2.55999994	10.5660162
2.57999992	10.5268803
2.5999999	10.4863348
2.61999989	10.4465313
2.63999987	10.4071131
2.66000009	10.3687458
2.68000007	10.3314819
2.70000005	10.2938757
2.72000003	10.257184
2.74000001	10.2197866
2.75999999	10.1827316
2.77999997	10.1463909
2.79999995	10.1102295
2.81999993	10.0759125
2.83999991	10.0446463
2.8599999	10.0197716
2.87999988	10.0126638
2.9000001	10.1679449
2.92000008	10.1646175
2.94000006	10.1313934
2.96000004	10.6000357
2.98000002	10.772646
3	10.7959805
3.01999998	10.7670441
3.03999996	10.7390366
3.05999994	10.7155924
3.07999992	10.7029095
3.0999999	10.6751652
3.11999989	10.6409063
3.13999987	10.6073112
3.16000009	10.5776234
3.18000007	10.5452662
3.20000005	10.5123091
3.22000003	10.4799366
3.24000001	10.4516096
3.25999999	10.4201059
3.27999997	10.3890867
3.29999995	10.3613663
3.31999993	10.3330288
3.33999991	10.3023243
3.3599999	10.2716322
3.37999988	10.2412758
3.4000001	10.2113199
3.42000008	10.1827126
3.44000006	10.2070398
3.46000004	10.2646046
3.48000002	10.4519415
3.5	10.7311535
3.51999998	10.7052794
3.53999996	10.6807251
3.55999994	10.6511946
3.57999992	10.6337528
3.5999999	10.613863
3.61999989	10.6604538
3.63999987	10.6408405
3.66000009	10.6303072
3.68000007	10.6257534
3.70000005	10.6018267
3.72000003	10.5733013
3.74000001	10.5452089
3.75999999	10.5217466
3.77999997	10.4959764
3.79999995	10.4688778
3.81999993	10.4420538
3.83999991	10.4148264
3.8599999	10.3879166
3.87999988	10.3615599
3.9000001	10.3356047
3.92000008	10.3100939
3.94000006	10.2839289
3.96000004	10.2585049
3.98000002	10.2329693
4	10.2074881
4.01999998	10.1831398
4.03999996	10.481328
4.05999994	10.4847412
4.07999992	10.5405912
4.0999999	10.7631922
4.11999989	10.8004856
4.13999987	10.8242378
4.15999985	10.832799
4.17999983	10.9026041
4.19999981	10.905757
4.21999979	10.8809652
4.23999977	10.8592939
4.25999975	10.8402147
4.28000021	10.8244715
4.30000019	10.8026743
4.32000017	10.7776489
4.34000015	10.7649527
4.36000013	10.7415123
4.38000011	10.7173538
4.4000001	10.6930151
4.42000008	10.6687956
4.44000006	10.6447964
4.46000004	10.6216488
4.48000002	10.5983057
4.5	10.5749083
4.51999998	10.5523062
4.53999996	10.5290565
4.55999994	10.5060711
4.57999992	10.4831858
4.5999999	10.4605303
4.61999989	10.4387817
4.63999987	10.6424713
4.65999985	10.8601694
4.67999983	10.8509598
4.69999981	10.8284092
4.71999979	10.8150406
4.73999977	10.9471378
4.75999975	10.9242382
4.78000021	10.9081964
4.80000019	10.8973999
4.82000017	10.8788404
4.84000015	10.8564558
4.86000013	10.8356543
4.88000011	10.8160172
4.9000001	10.7947521
4.92000008	10.7727957
4.94000006	10.7512369
4.96000004	10.7322063
4.98000002	10.7118397
5	10.6904268
5.01999998	10.6692057
5.03999996	10.6482992
5.05999994	10.6273727
5.07999992	10.6065292
5.0999999	10.5859079
5.11999989	10.5653248
5.13999987	10.5447569
5.15999985	10.5243378
5.17999983	10.5041018
5.19999981	10.4839411
5.21999979	10.4646759
5.23999977	10.6851664
5.25999975	10.7080021
5.28000021	10.7695618
5.30000019	10.8283405
5.32000017	11.2001123
5.34000015	11.2864227
5.36000013	11.2665758
5.38000011	11.2594929
5.4000001	11.2486753
5.42000008	11.2331648
5.44000006	11.2127333
5.46000004	11.194375
5.48000002	11.179616
5.5	11.1633167
5.51999998	11.1430826
5.53999996	11.1295652
5.55999994	11.1101933
5.57999992	11.0903807
5.5999999	11.0707865
5.61999989	11.0512371
5.63999987	11.0318642
5.65999985	11.0123806
5.67999983	10.993104
5.69999981	10.9738874
5.71999979	10.9549046
5.73999977	10.9358025
5.75999975	10.9168015
5.78000021	10.8979702
5.80000019	10.8792086
5.82000017	10.861208
5.84000015	11.0344057
5.86000013	11.220212
5.88000011	11.3901052
5.9000001	11.4495878
5.92000008	11.4782
5.94000006	11.4605074
5.96000004	11.4975319
5.98000002	11.5120821
6	11.4952593
6.01999998	11.4765167
6.03999996	11.4576311
6.05999994	11.4391413
6.07999992	11.4219351
6.0999999	11.4185038
6.11999989	11.3998375
6.13999987	11.3856831
6.15999985	11.3676395
6.17999983	11.3504515
6.19999981	11.3322954
6.21999979	11.314064
6.23999977	11.2959204
6.25999975	11.2778845
6.28000021	11.2602386
6.30000019	11.2427797
6.32000017	11.225853
6.34000015	11.2081509
6.36000013	11.1906204
6.38000011	11.1730719
6.4000001	11.1558628
6.42000008	11.1391048
6.44000006	11.2314043
6.46000004	11.4074078
6.48000002	11.5708914
6.5	11.5550585
6.51999998	11.555541
6.53999996	11.6043844
6.55999994	11.5872507
