# Supplementary material for: Universal Walking Control Framework of Biped Robot Based on Dynamic Model and Quadratic Programming
Source: Hindawi journal article supplement (doi:10.1155/2020/2789039), 2020-10-31
Supplement: f1 [file 2789039.f1.zip › sim/msr knee pitch]

0.0199999996	0
0.0399999991	2.42646747e-05
0.0599999987	0.0533389747
0.0799999982	0.896539867
0.099999994	2.59251904
0.120000005	6.72550964
0.140000001	6.45254898
0.159999996	6.07792187
0.179999992	5.73284292
0.200000003	5.50533533
0.219999999	5.3932476
0.239999995	5.28964567
0.25999999	5.08959293
0.280000001	5.0947423
0.300000012	5.21518183
0.320000023	5.25760031
0.340000004	5.29257631
0.360000014	5.28473759
0.380000025	5.25425339
0.400000006	5.30281019
0.420000017	44.2933922
0.439999998	46.9567719
0.460000008	49.8667984
0.480000019	53.3270607
0.5	55.2563362
0.519999981	58.1190224
0.539999962	61.6905098
0.560000002	64.2145004
0.579999983	65.6411896
0.599999964	68.0149765
0.620000005	68.9018021
0.639999986	69.7340851
0.659999967	70.8969269
0.680000007	70.9950943
0.699999988	69.9920959
0.719999969	69.018898
0.74000001	68.0848618
0.75999999	67.211937
0.779999971	66.3927307
0.799999952	65.584671
0.819999993	64.7988281
0.839999974	64.0281677
0.859999955	63.2795448
0.879999995	62.5806084
0.899999976	61.9152832
0.919999957	61.2635689
0.939999998	60.6269722
0.959999979	60.0053444
0.979999959	59.4018822
1	58.8265114
1.01999998	58.254715
1.03999996	57.6942215
1.05999994	57.4857063
1.07999992	57.029808
1.10000002	56.5624084
1.12	57.3770714
1.13999999	58.4491386
1.15999997	60.0234375
1.17999995	61.526001
1.19999993	63.0663567
1.22000003	64.3892899
1.24000001	65.8490982
1.25999999	67.3262863
1.27999997	67.2950363
1.29999995	66.7802505
1.31999993	66.2726593
1.34000003	65.7795258
1.36000001	65.3610229
1.38	64.9522476
1.39999998	64.5501404
1.41999996	64.1182556
1.43999994	63.6776886
1.46000004	63.253273
1.48000002	62.8504791
1.5	62.4489517
1.51999998	62.0514526
1.53999996	61.6662903
1.55999994	61.2824059
1.57999992	60.909874
1.60000002	60.5526276
1.62	60.2004814
1.63999999	68.4235992
1.65999997	68.3306808
1.67999995	67.926239
1.69999993	67.7674561
1.72000003	67.9496231
1.74000001	68.1458359
1.75999999	68.4498444
1.77999997	68.830368
1.79999995	69.6146011
1.81999993	69.8656845
1.84000003	69.4999847
1.86000001	69.1272202
1.88	68.7652512
1.89999998	68.4563141
1.91999996	68.0991898
1.93999994	67.7510529
1.96000004	67.468605
1.98000002	67.2249527
2	66.9487
2.01999998	66.6349335
2.03999996	66.3097916
2.05999994	66.0013809
2.07999992	65.7071915
2.0999999	65.4135361
2.11999989	65.1181641
2.13999987	64.8277588
2.16000009	64.5394058
2.18000007	64.2565384
2.20000005	63.9816322
2.22000003	63.7115669
2.24000001	67.325592
2.25999999	68.0558929
2.27999997	67.786087
2.29999995	67.5384903
2.31999993	67.6368866
2.33999991	67.6404419
2.3599999	67.8837128
2.37999988	68.3916702
2.4000001	69.0691147
2.42000008	69.4442596
2.44000006	69.1592865
2.46000004	68.8779221
2.48000002	68.6059418
2.5	68.362915
2.51999998	68.0913162
2.53999996	67.8269806
2.55999994	67.6178207
2.57999992	67.4185638
2.5999999	67.2036972
2.61999989	66.9596405
2.63999987	66.708046
2.66000009	66.4682999
2.68000007	66.2393799
2.70000005	66.0080643
2.72000003	65.7755737
2.74000001	65.5461731
2.75999999	65.3180771
2.77999997	65.0933609
2.79999995	64.8746109
2.81999993	64.6585922
2.83999991	67.5763702
2.8599999	67.8060226
2.87999988	67.7346191
2.9000001	67.6703186
2.92000008	67.445015
2.94000006	67.3484726
2.96000004	67.4314728
2.98000002	67.6964569
3	68.1965942
3.01999998	68.7196198
3.03999996	68.4939041
3.05999994	68.2698288
3.07999992	68.0550537
3.0999999	67.8618927
3.11999989	67.6442108
3.13999987	67.4285431
3.16000009	67.2356644
3.18000007	67.0793991
3.20000005	66.901207
3.22000003	66.7058487
3.24000001	66.5035477
3.25999999	66.3070679
3.27999997	66.119873
3.29999995	65.9319458
3.31999993	65.742157
3.33999991	65.5551605
3.3599999	65.3676529
3.37999988	65.1824951
3.4000001	65.0038147
3.42000008	64.8252869
3.44000006	67.1443329
3.46000004	67.1258011
3.48000002	67.0334702
3.5	66.8875809
3.51999998	66.6977386
3.53999996	66.5690231
3.55999994	66.4204025
3.57999992	66.4397202
3.5999999	66.6414871
3.61999989	66.6071625
3.63999987	66.4243164
3.66000009	66.2425842
3.68000007	66.0699005
3.70000005	65.914566
3.72000003	65.7372818
3.74000001	65.5666046
3.75999999	65.4318619
3.77999997	65.3029099
3.79999995	65.1634674
3.81999993	65.0035324
3.83999991	64.8355331
3.8599999	64.6747437
3.87999988	64.5201645
3.9000001	64.3641663
3.92000008	64.207016
3.94000006	64.0524216
3.96000004	63.8976097
3.98000002	63.7444382
4	63.5945091
4.01999998	63.4463806
4.03999996	66.7240982
4.05999994	66.5988388
4.07999992	66.4754333
4.0999999	66.3167801
4.11999989	66.1564255
4.13999987	66.0359879
4.15999985	65.9485779
4.17999983	65.9622421
4.19999981	66.2736053
4.21999979	66.5704346
4.23999977	66.4138107
4.25999975	66.2577286
4.28000021	66.1091843
4.30000019	65.9755859
4.32000017	65.8228149
4.34000015	65.6738358
4.36000013	65.5559006
4.38000011	65.4457703
4.4000001	65.3231735
4.42000008	65.1832657
4.44000006	65.0376892
4.46000004	64.8996277
4.48000002	64.7661057
4.5	64.6306152
4.51999998	64.4942017
4.53999996	64.3588028
4.55999994	64.2235565
4.57999992	64.089653
4.5999999	63.9584923
4.61999989	63.8287544
4.63999987	66.9308472
4.65999985	66.7870712
4.67999983	66.8255844
4.69999981	66.685936
4.71999979	66.5675049
4.73999977	66.65271
4.75999975	67.0119858
4.78000021	67.4091034
4.80000019	67.807518
4.82000017	68.0246124
4.84000015	67.8840332
4.86000013	67.7445068
4.88000011	67.6123428
4.9000001	67.4952621
4.92000008	67.3580475
4.94000006	67.2221985
4.96000004	67.100647
4.98000002	67.0063095
5	66.8999481
5.01999998	66.7730865
5.03999996	66.6414337
5.05999994	66.5149994
5.07999992	66.3934326
5.0999999	66.2712097
5.11999989	66.146843
5.13999987	66.0242538
5.15999985	65.9014206
5.17999983	65.7798843
5.19999981	65.6606598
5.21999979	65.542366
5.23999977	68.387413
5.25999975	68.2578049
5.28000021	68.1350479
5.30000019	68.0389252
5.32000017	68.024559
5.34000015	68.0927048
5.36000013	68.2570877
5.38000011	68.4817963
5.4000001	68.7630157
5.42000008	68.9387283
5.44000006	68.8119507
5.46000004	68.6858292
5.48000002	68.564949
5.5	68.4556427
5.51999998	68.331604
5.53999996	68.2108688
5.55999994	68.112709
5.57999992	68.0303497
5.5999999	67.9238815
5.61999989	67.8090897
5.63999987	67.6896515
5.65999985	67.5754166
5.67999983	67.4646835
5.69999981	67.352951
5.71999979	67.2397614
5.73999977	67.1280975
5.75999975	67.0160446
5.78000021	66.9051208
5.80000019	66.7960281
5.82000017	66.6878815
5.84000015	69.4013596
5.86000013	69.3169861
5.88000011	69.2545471
5.9000001	69.1418839
5.92000008	69.0377808
5.94000006	68.9994812
5.96000004	69.0360413
5.98000002	69.1745911
6	69.4109039
6.01999998	69.5842056
6.03999996	69.4690247
6.05999994	69.3543015
6.07999992	69.2441864
6.0999999	69.1590729
6.11999989	69.0460587
6.13999987	68.934906
6.15999985	68.8445969
6.17999983	68.7626801
6.19999981	68.6706772
6.21999979	68.5653687
6.23999977	68.4562531
6.25999975	68.3520508
6.28000021	68.2509537
6.30000019	68.1485748
6.32000017	68.0452118
6.34000015	67.9425201
6.36000013	67.8395691
6.38000011	67.7376328
6.4000001	67.6377792
6.42000008	67.5383759
6.44000006	69.9355392
6.46000004	69.8615265
6.48000002	69.7572632
6.5	69.6693497
6.51999998	69.5671005
6.53999996	69.525238
6.55999994	69.5633163
