# Supplementary material for: Universal Walking Control Framework of Biped Robot Based on Dynamic Model and Quadratic Programming
Source: Hindawi journal article supplement (doi:10.1155/2020/2789039), 2020-10-31
Supplement: f1 [file 2789039.f1.zip › sim/speed ankle pitch]

0	0
0.0199999996	-618.695496
0.0399999991	0.814756215
0.0599999987	-11.5203094
0.0799999982	-49.6515923
0.099999994	-86.5303879
0.120000005	-106.956581
0.140000001	-105.04763
0.159999996	-81.4570084
0.179999992	-41.5500031
0.200000003	8.2877512
0.219999999	58.6069527
0.239999995	94.1954803
0.25999999	94.1327362
0.280000001	81.5063553
0.300000012	70.5209808
0.320000023	52.1569481
0.340000004	37.0495071
0.360000014	24.6331635
0.380000025	14.4624557
0.400000006	6.00830412
0.420000017	-0.643275738
0.439999998	-6.22844934
0.460000008	-10.7803869
0.480000019	-14.5119753
0.5	-17.5127335
0.519999981	-19.8884869
0.539999962	-21.7236309
0.560000002	-23.1122074
0.579999983	-23.9800682
0.599999964	-24.2418785
0.620000005	-24.8367023
0.639999986	-23.9813061
0.659999967	-37.3911018
0.680000007	-81.5306015
0.699999988	-115.754372
0.719999969	-122.71212
0.74000001	-96.8477325
0.75999999	-43.9882126
0.779999971	21.4013729
0.799999952	86.4843674
0.819999993	142.501144
0.839999974	176.024475
0.859999955	156.554901
0.879999995	119.464027
0.899999976	87.439743
0.919999957	58.322773
0.939999998	34.8620148
0.959999979	16.0931206
0.979999959	1.21803617
1	-10.5619488
1.01999998	-19.8695755
1.03999996	-27.0306873
1.05999994	-32.5281792
1.07999992	-36.5435219
1.10000002	-39.3437271
1.12	-41.021862
1.13999999	-41.6256065
1.15999997	-41.1089439
1.17999995	-38.1521568
1.19999993	-34.2928886
1.22000003	-26.1682472
1.24000001	-8.47677708
1.25999999	-23.8910637
1.27999997	-98.1534042
1.29999995	-140.740067
1.31999993	-140.944458
1.34000003	-94.7771606
1.36000001	-13.7127151
1.38	77.8485336
1.39999998	162.524536
1.41999996	237.971664
1.43999994	161.502594
1.46000004	131.545135
1.48000002	136.793152
1.5	138.362244
1.51999998	89.3443604
1.53999996	45.9670486
1.55999994	12.836956
1.57999992	-12.397274
1.60000002	-31.6137981
1.62	-46.0842705
1.63999999	-56.6826096
1.65999997	-63.1610909
1.67999995	-67.4193268
1.69999993	-69.0320816
1.72000003	-68.0420914
1.74000001	-63.9915733
1.75999999	-55.7938118
1.77999997	-40.2153854
1.79999995	-9.60200787
1.81999993	5.75264168
1.84000003	21.8326569
1.86000001	13.5711594
1.88	-91.8218231
1.89999998	-180.128998
1.91999996	-189.789627
1.93999994	-141.147308
1.96000004	-47.9314499
1.98000002	60.4189186
2	158.852707
2.01999998	242.873001
2.03999996	147.893585
2.05999994	122.841812
2.07999992	133.661041
2.0999999	138.686111
2.11999989	90.6639328
2.13999987	47.8934669
2.16000009	14.0858784
2.18000007	-10.1882095
2.20000005	-29.4882431
2.22000003	-44.0962601
2.24000001	-54.8558769
2.25999999	-62.441288
2.27999997	-66.1356354
2.29999995	-68.0032043
2.31999993	-67.2628098
2.33999991	-63.5914536
2.3599999	-55.8949394
2.37999988	-41.234581
2.4000001	-13.1147318
2.42000008	2.7574327
2.44000006	19.323288
2.46000004	11.2889795
2.48000002	-90.6983871
2.5	-176.592758
2.51999998	-186.313477
2.53999996	-137.98912
2.55999994	-45.158905
2.57999992	62.5959511
2.5999999	160.417419
2.61999989	243.529312
2.63999987	148.113037
2.66000009	122.951683
2.68000007	133.785873
2.70000005	138.793625
2.72000003	91.220787
2.74000001	48.6654854
2.75999999	14.9230461
2.77999997	-9.3434639
2.79999995	-28.7043514
2.81999993	-43.3779449
2.83999991	-54.2586823
2.8599999	-61.9399796
2.87999988	-65.7803802
2.9000001	-67.7295609
2.92000008	-67.0548706
2.94000006	-63.4776497
2.96000004	-55.9836922
2.98000002	-41.7332687
3	-14.6865721
3.01999998	1.45269585
3.03999996	18.2907772
3.05999994	10.390852
3.07999992	-90.3157196
3.0999999	-174.973663
3.11999989	-184.732285
3.13999987	-136.534805
3.16000009	-43.8826866
3.18000007	63.6009331
3.20000005	161.160965
3.22000003	243.940979
3.24000001	148.427521
3.25999999	123.262337
3.27999997	134.078247
3.29999995	139.063904
3.31999993	91.5870514
3.33999991	49.0367813
3.3599999	15.2957821
3.37999988	-9.00730228
3.4000001	-28.3945179
3.42000008	-43.1149216
3.44000006	-54.0109406
3.46000004	-61.7458038
3.48000002	-65.5946426
3.5	-67.6064529
3.51999998	-66.9995041
3.53999996	-63.465477
3.55999994	-55.999485
3.57999992	-41.8696594
3.5999999	-15.1069698
3.61999989	1.12821925
3.63999987	18.0441227
3.66000009	10.1841536
3.68000007	-90.0379486
3.70000005	-174.603119
3.72000003	-184.307114
3.74000001	-136.153671
3.75999999	-43.5443344
3.77999997	63.8714066
3.79999995	161.34906
3.81999993	244.023621
3.83999991	148.363235
3.8599999	123.221474
3.87999988	134.020096
3.9000001	139.123886
3.92000008	91.6136093
3.94000006	49.122551
3.96000004	15.3853645
3.98000002	-8.90480614
4	-28.3033123
4.01999998	-43.0168343
4.03999996	-53.91679
4.05999994	-61.6350136
4.07999992	-65.5348816
4.0999999	-67.5592422
4.11999989	-66.986908
4.13999987	-63.4697037
4.15999985	-56.0939522
4.17999983	-42.0489082
4.19999981	-15.4852772
4.21999979	0.730616808
4.23999977	17.6626987
4.25999975	9.8298378
4.28000021	-90.1041565
4.30000019	-174.359283
4.32000017	-184.046112
4.34000015	-135.911545
4.36000013	-43.327816
4.38000011	64.0377197
4.4000001	161.473526
4.42000008	244.04129
4.44000006	148.355988
4.46000004	123.195656
4.48000002	133.845032
4.5	138.963272
4.51999998	91.6457291
4.53999996	49.1892204
4.55999994	15.4816484
4.57999992	-8.79582214
4.5999999	-28.1841583
4.61999989	-42.8830681
4.63999987	-53.8027458
4.65999985	-61.4975281
4.67999983	-65.3888855
4.69999981	-67.3964691
4.71999979	-66.8190155
4.73999977	-63.3461685
4.75999975	-55.9790344
4.78000021	-42.0266685
4.80000019	-15.6141968
4.82000017	0.604258299
4.84000015	17.5277596
4.86000013	9.68264675
4.88000011	-90.117691
4.9000001	-174.153091
4.92000008	-183.871948
4.94000006	-135.753433
4.96000004	-43.190361
4.98000002	64.1458893
5	161.544312
5.01999998	244.036865
5.03999996	148.303391
5.05999994	123.149475
5.07999992	133.833374
5.0999999	139.046448
5.11999989	91.6358032
5.13999987	49.2358246
5.15999985	15.5236435
5.17999983	-8.75460625
5.19999981	-28.1253967
5.21999979	-42.8324165
5.23999977	-53.7417221
5.25999975	-61.461525
5.28000021	-65.3741531
5.30000019	-67.4286118
5.32000017	-66.8890686
5.34000015	-63.4136963
5.36000013	-56.1027908
5.38000011	-42.2028427
5.4000001	-15.9550657
5.42000008	0.291734457
5.44000006	17.2392273
5.46000004	9.35654831
5.48000002	-90.0938263
5.5	-173.969543
5.51999998	-183.673111
5.53999996	-135.566696
5.55999994	-43.0235329
5.57999992	64.2556076
5.5999999	161.619537
5.61999989	244.01329
5.63999987	148.267578
5.65999985	123.148354
5.67999983	133.840424
5.69999981	138.94136
5.71999979	91.6908722
5.73999977	49.2939377
5.75999975	15.5826921
5.78000021	-8.69369984
5.80000019	-28.087265
5.82000017	-42.7942734
5.84000015	-53.7281456
5.86000013	-61.4673309
5.88000011	-65.3611374
5.9000001	-67.4033813
5.92000008	-66.8568802
5.94000006	-63.3911972
5.96000004	-56.0608711
5.98000002	-42.1841888
6	-15.9550657
6.01999998	0.320634693
6.03999996	17.2924595
6.05999994	9.42877769
6.07999992	-90.0443954
6.0999999	-173.885696
6.11999989	-183.60318
6.13999987	-135.499268
6.15999985	-42.9635963
6.17999983	64.3233948
6.19999981	161.662567
6.21999979	244.029282
6.23999977	148.245712
6.25999975	123.104477
6.28000021	133.823441
6.30000019	138.938492
6.32000017	91.705246
6.34000015	49.3070755
6.36000013	15.5967169
6.38000011	-8.68320942
6.4000001	-28.0735188
6.42000008	-42.7950211
6.44000006	-53.7311592
6.46000004	-61.4772072
6.48000002	-65.4047623
6.5	-67.4421844
6.51999998	-66.908493
6.53999996	-63.4332924
6.55999994	-56.1337852
