# Supplementary material for: Universal Walking Control Framework of Biped Robot Based on Dynamic Model and Quadratic Programming
Source: Hindawi journal article supplement (doi:10.1155/2020/2789039), 2020-10-31
Supplement: f1 [file 2789039.f1.zip › sim/speed ankle roll]

0	0
0.0199999996	-77.5225449
0.0399999991	-3.2514689
0.0599999987	-5.60936785
0.0799999982	-8.68823051
0.099999994	-12.1965408
0.120000005	-15.5695019
0.140000001	-16.9630642
0.159999996	-14.6243963
0.179999992	-9.12551689
0.200000003	-2.95565772
0.219999999	2.1061101
0.239999995	5.48496199
0.25999999	7.66092205
0.280000001	9.84871674
0.300000012	12.3524399
0.320000023	14.5259562
0.340000004	15.8106079
0.360000014	16.3509121
0.380000025	16.2608547
0.400000006	15.4375935
0.420000017	14.5530224
0.439999998	13.1559267
0.460000008	11.3854551
0.480000019	9.36729717
0.5	7.08587742
0.519999981	4.58318758
0.539999962	1.8998065
0.560000002	-0.961063683
0.579999983	-4.01075554
0.599999964	-7.22919416
0.620000005	-9.98783302
0.639999986	-11.7052794
0.659999967	-12.8888931
0.680000007	-14.6827669
0.699999988	-17.3385372
0.719999969	-20.3876152
0.74000001	-21.532711
0.75999999	-18.5661411
0.779999971	-12.1370115
0.799999952	-5.2663002
0.819999993	0.0289322548
0.839999974	3.48767614
0.859999955	5.75769997
0.879999995	8.06093597
0.899999976	10.6502609
0.919999957	12.9796009
0.939999998	14.4419022
0.959999979	15.1385221
0.979999959	14.9946032
1	14.7599382
1.01999998	13.8354845
1.03999996	12.5014248
1.05999994	10.8322268
1.07999992	8.8483305
1.10000002	6.62899017
1.12	4.18878889
1.13999999	1.55106533
1.15999997	-1.25699365
1.17999995	-4.20729256
1.19999993	-7.29597998
1.22000003	-9.83293438
1.24000001	-11.3244696
1.25999999	-12.3169632
1.27999997	-13.9283228
1.29999995	-16.8354454
1.31999993	-20.3602333
1.34000003	-22.0338287
1.36000001	-18.6786575
1.38	-11.4297237
1.39999998	-4.27443933
1.41999996	0.677266598
1.43999994	2.96799469
1.46000004	5.06944132
1.48000002	7.45659256
1.5	10.1109428
1.51999998	12.3876581
1.53999996	13.8473549
1.55999994	14.6061211
1.57999992	14.7823124
1.60000002	14.4036417
1.62	13.5485792
1.63999999	12.2442026
1.65999997	10.5701685
1.67999995	8.59594727
1.69999993	6.36078167
1.72000003	3.92842865
1.74000001	1.32432306
1.75999999	-1.39301586
1.77999997	-4.19189119
1.79999995	-7.04664087
1.81999993	-9.57766247
1.84000003	-11.4533119
1.86000001	-12.3289986
1.88	-12.8999357
1.89999998	-15.4681759
1.91999996	-19.3820019
1.93999994	-21.9245358
1.96000004	-19.4524651
1.98000002	-12.2914381
2	-4.71926594
2.01999998	0.552701056
2.03999996	2.78552198
2.05999994	4.93267727
2.07999992	7.33703184
2.0999999	10.0123959
2.11999989	12.3014269
2.13999987	13.7752914
2.16000009	14.2858744
2.18000007	14.7842379
2.20000005	14.4017582
2.22000003	13.5455484
2.24000001	12.2481441
2.25999999	10.5848074
2.27999997	8.60565186
2.29999995	6.36770964
2.31999993	3.92607903
2.33999991	1.34378242
2.3599999	-1.36238265
2.37999988	-4.15544462
2.4000001	-7.01972103
2.42000008	-9.55723095
2.44000006	-11.1795654
2.46000004	-12.0896235
2.48000002	-12.750824
2.5	-15.5827522
2.51999998	-19.5003357
2.53999996	-22.099659
2.55999994	-19.5729218
2.57999992	-12.3236361
2.5999999	-4.71323633
2.61999989	0.56294632
2.63999987	2.80845642
2.66000009	4.9654088
2.68000007	7.3631258
2.70000005	10.0482864
2.72000003	12.3449697
2.74000001	13.8191271
2.75999999	14.3429804
2.77999997	14.8112173
2.79999995	14.4516373
2.81999993	13.5939074
2.83999991	12.279726
2.8599999	10.5918083
2.87999988	8.57984829
2.9000001	6.33064842
2.92000008	3.87403727
2.94000006	1.26179481
2.96000004	-1.46159458
2.98000002	-4.25472403
3	-7.10590935
3.01999998	-9.62956905
3.03999996	-11.2528877
3.05999994	-12.1319618
3.07999992	-12.9977169
3.0999999	-15.6113043
3.11999989	-19.5339565
3.13999987	-22.1555233
3.16000009	-19.6244144
3.18000007	-12.35816
3.20000005	-4.75963879
3.22000003	0.522306681
3.24000001	2.75757146
3.25999999	4.92686081
3.27999997	7.34359598
3.29999995	10.0373898
3.31999993	12.3301039
3.33999991	13.8066244
3.3599999	14.3385258
3.37999988	14.8227911
3.4000001	14.438262
3.42000008	13.5832777
3.44000006	12.2807388
3.46000004	10.6209364
3.48000002	8.62857533
3.5	6.40360212
3.51999998	3.96918869
3.53999996	1.37318218
3.55999994	-1.34431267
3.57999992	-4.14180994
3.5999999	-7.00416422
3.61999989	-9.54017258
3.63999987	-11.1589069
3.66000009	-12.0759363
3.68000007	-12.7253742
3.70000005	-15.5178585
3.72000003	-19.5163326
3.74000001	-22.1393929
3.75999999	-19.6053753
3.77999997	-12.3446283
3.79999995	-4.73338509
3.81999993	0.533928692
3.83999991	2.80341911
3.8599999	4.94428873
3.87999988	7.35834455
3.9000001	10.0380087
3.92000008	12.3426428
3.94000006	13.8191919
3.96000004	14.3506823
3.98000002	14.8160734
4	14.452424
4.01999998	13.5839415
4.03999996	12.2879324
4.05999994	10.6260633
4.07999992	8.64150333
4.0999999	6.40706682
4.11999989	3.97155905
4.13999987	1.37807012
4.15999985	-1.33874512
4.17999983	-4.14906693
4.19999981	-7.02240992
4.21999979	-9.56730843
4.23999977	-11.2092056
4.25999975	-12.3776379
4.28000021	-12.7316523
4.30000019	-15.5146208
4.32000017	-19.5062695
4.34000015	-22.1404858
4.36000013	-19.6013317
4.38000011	-12.3009262
4.4000001	-4.68001366
4.42000008	0.590224385
4.44000006	2.83960843
4.46000004	4.97774601
4.48000002	7.40613461
4.5	10.063921
4.51999998	12.3466883
4.53999996	13.8187695
4.55999994	14.3461246
4.57999992	14.8093872
4.5999999	14.4423819
4.61999989	13.5686998
4.63999987	12.2744017
4.65999985	10.614131
4.67999983	8.62728786
4.69999981	6.38245583
4.71999979	3.93834996
4.73999977	1.3438524
4.75999975	-1.38024986
4.78000021	-4.18997431
4.80000019	-7.05820131
4.82000017	-9.59155178
4.84000015	-11.2156305
4.86000013	-12.3838367
4.88000011	-12.7289276
4.9000001	-15.5610285
4.92000008	-19.497694
4.94000006	-22.1387615
4.96000004	-19.5972328
4.98000002	-12.3110857
5	-4.71652317
5.01999998	0.549851596
5.03999996	2.79426241
5.05999994	4.93070316
5.07999992	7.35965681
5.0999999	10.0228443
5.11999989	12.3310318
5.13999987	13.8041172
5.15999985	14.3371754
5.17999983	14.8209305
5.19999981	14.4308701
5.21999979	13.5708265
5.23999977	12.2702761
5.25999975	10.6042223
5.28000021	8.61867619
5.30000019	6.38055944
5.32000017	3.94367194
5.34000015	1.35025513
5.36000013	-1.36515737
5.38000011	-4.16862869
5.4000001	-7.03523064
5.42000008	-9.57690048
5.44000006	-11.1947527
5.46000004	-12.1089802
5.48000002	-12.78508
5.5	-15.6211929
5.51999998	-19.5658302
5.53999996	-22.2150002
5.55999994	-19.6637211
5.57999992	-12.3416824
5.5999999	-4.70768642
5.61999989	0.611429989
5.63999987	2.86267114
5.65999985	4.98660374
5.67999983	7.4118762
5.69999981	10.0816793
5.71999979	12.3725576
5.73999977	13.8428516
5.75999975	14.3717957
5.78000021	14.8332129
5.80000019	14.4642811
5.82000017	13.5926981
5.84000015	12.2872963
5.86000013	10.6222878
5.88000011	8.6400404
5.9000001	6.40361166
5.92000008	3.97125912
5.94000006	1.37520933
5.96000004	-1.34840012
5.98000002	-4.16273499
6	-7.03960466
6.01999998	-9.58392239
6.03999996	-11.2185783
6.05999994	-12.1264677
6.07999992	-12.7947187
6.0999999	-15.6309586
6.11999989	-19.5771275
6.13999987	-22.2215519
6.15999985	-19.6717262
6.17999983	-12.3644991
6.19999981	-4.72191238
6.21999979	0.604567826
6.23999977	2.88441038
6.25999975	5.01678467
6.28000021	7.43411732
6.30000019	10.1000681
6.32000017	12.3842964
6.34000015	13.8553486
6.36000013	14.3832741
6.38000011	14.8628759
6.4000001	14.4745903
6.42000008	13.6070557
6.44000006	12.2986584
6.46000004	10.6210566
6.48000002	8.63315868
6.5	6.38879108
6.51999998	3.94102597
6.53999996	1.33837426
6.55999994	-1.38047469
