# Supplementary material for: Universal Walking Control Framework of Biped Robot Based on Dynamic Model and Quadratic Programming
Source: Hindawi journal article supplement (doi:10.1155/2020/2789039), 2020-10-31
Supplement: f1 [file 2789039.f1.zip › sim/speed hip pitch]

0	0
0.0199999996	-438.126282
0.0399999991	0.413653344
0.0599999987	-12.7515364
0.0799999982	-54.5410233
0.099999994	-98.924408
0.120000005	-130.819565
0.140000001	-143.188354
0.159999996	-133.258789
0.179999992	-102.21566
0.200000003	-54.3095665
0.219999999	-1.29175949
0.239999995	40.0763054
0.25999999	46.7027855
0.280000001	40.2523537
0.300000012	34.6326447
0.320000023	35.2551308
0.340000004	36.0273705
0.360000014	36.8960838
0.380000025	37.8182449
0.400000006	38.789669
0.420000017	39.8176117
0.439999998	40.8861122
0.460000008	42.020649
0.480000019	43.2799644
0.5	44.6987228
0.519999981	46.3508606
0.539999962	48.3146248
0.560000002	50.6897812
0.579999983	53.576004
0.599999964	57.1110344
0.620000005	64.5034943
0.639999986	71.1855774
0.659999967	57.7942734
0.680000007	-1.47105205
0.699999988	-67.4394684
0.719999969	-125.782181
0.74000001	-167.989532
0.75999999	-184.909882
0.779999971	-169.179138
0.799999952	-123.433311
0.819999993	-60.5765266
0.839999974	-2.47141862
0.859999955	14.2729607
0.879999995	13.5730371
0.899999976	13.9100218
0.919999957	17.7560158
0.939999998	22.1072731
0.959999979	26.7801476
0.979999959	31.5798931
1	36.3942375
1.01999998	41.1637573
1.03999996	45.9602585
1.05999994	50.7442932
1.07999992	55.6278801
1.10000002	60.7350273
1.12	66.2009277
1.13999999	72.198555
1.15999997	78.9690323
1.17999995	88.1336899
1.19999993	98.1046982
1.22000003	120.079018
1.24000001	147.457031
1.25999999	132.04744
1.27999997	33.2720299
1.29999995	-60.8752518
1.31999993	-145.012375
1.34000003	-212.591949
1.36000001	-247.796173
1.38	-235.259125
1.39999998	-177.032791
1.41999996	-86.5764084
1.43999994	-43.6087074
1.46000004	-25.259491
1.48000002	-9.27642155
1.5	6.12539911
1.51999998	3.87937665
1.53999996	6.32509661
1.55999994	12.3746805
1.57999992	20.5251465
1.60000002	29.7810764
1.62	39.6047668
1.63999999	49.7994232
1.65999997	61.1836395
1.67999995	72.405899
1.69999993	84.3204803
1.72000003	97.3497543
1.74000001	112.166824
1.75999999	130.183929
1.77999997	154.872696
1.79999995	188.640869
1.81999993	181.227417
1.84000003	173.105637
1.86000001	164.444885
1.88	104.475136
1.89999998	-43.9450569
1.91999996	-149.3853
1.93999994	-233.943619
1.96000004	-285.373993
1.98000002	-282.835785
2	-225.998428
2.01999998	-131.017548
2.03999996	-88.623291
2.05999994	-62.9619675
2.07999992	-40.205822
2.0999999	-18.7658596
2.11999989	-16.8188286
2.13999987	-10.9446096
2.16000009	-3.1182375
2.18000007	8.19409275
2.20000005	19.283844
2.22000003	30.6726723
2.24000001	42.1978493
2.25999999	53.8112183
2.27999997	66.71772
2.29999995	79.3686752
2.31999993	92.9666061
2.33999991	108.216713
2.3599999	126.406738
2.37999988	150.699478
2.4000001	182.570496
2.42000008	176.036362
2.44000006	168.799881
2.46000004	160.584122
2.48000002	103.886375
2.5	-41.8745232
2.51999998	-147.224045
2.53999996	-232.073898
2.55999994	-283.744598
2.57999992	-281.497467
2.5999999	-225.067719
2.61999989	-130.895584
2.63999987	-88.9187393
2.66000009	-63.3640976
2.68000007	-40.6243439
2.70000005	-19.1470699
2.72000003	-16.7074966
2.74000001	-10.5914888
2.75999999	-2.65387011
2.77999997	8.70046616
2.79999995	19.7965355
2.81999993	31.1690559
2.83999991	42.6387367
2.8599999	54.2108688
2.87999988	67.029686
2.9000001	79.6457291
2.92000008	93.1862793
2.94000006	108.33564
2.96000004	126.361382
2.98000002	150.271393
3	181.124283
3.01999998	174.841766
3.03999996	167.854141
3.05999994	159.7686
3.07999992	104.522774
3.0999999	-40.3649254
3.11999989	-145.746414
3.13999987	-230.792526
3.16000009	-282.627197
3.18000007	-280.571686
3.20000005	-224.343124
3.22000003	-130.461227
3.24000001	-88.6012115
3.25999999	-63.0626259
3.27999997	-40.3329506
3.29999995	-18.8695068
3.31999993	-16.3431911
3.33999991	-10.203022
3.3599999	-2.26847649
3.37999988	9.06016064
3.4000001	20.1242142
3.42000008	31.4607048
3.44000006	42.9163857
3.46000004	54.4547081
3.48000002	67.2482529
3.5	79.817894
3.51999998	93.3218613
3.53999996	108.419098
3.55999994	126.373184
3.57999992	150.181213
3.5999999	180.763504
3.61999989	174.549194
3.63999987	167.631531
3.66000009	159.584473
3.68000007	104.581253
3.70000005	-39.9259148
3.72000003	-145.335419
3.74000001	-230.431107
3.75999999	-282.313965
3.77999997	-280.309204
3.79999995	-224.144196
3.81999993	-130.408035
3.83999991	-88.6738739
3.8599999	-63.1729317
3.87999988	-40.4445381
3.9000001	-18.9694843
3.92000008	-16.3587303
3.94000006	-10.171689
3.96000004	-2.21323752
3.98000002	9.12769413
4	20.1991749
4.01999998	31.5385704
4.03999996	43.0006523
4.05999994	54.5385475
4.07999992	67.2983704
4.0999999	79.8600311
4.11999989	93.3452148
4.13999987	108.413078
4.15999985	126.346687
4.17999983	150.072906
4.19999981	180.437546
4.21999979	174.224792
4.23999977	167.327774
4.25999975	159.270172
4.28000021	104.601913
4.30000019	-39.6204338
4.32000017	-145.021057
4.34000015	-230.15506
4.36000013	-282.066071
4.38000011	-280.0867
4.4000001	-223.979507
4.42000008	-130.352631
4.44000006	-88.6820679
4.46000004	-63.218956
4.48000002	-40.5219765
4.5	-19.0727062
4.51999998	-16.4042358
4.53999996	-10.1852636
4.55999994	-2.2059803
4.57999992	9.14920902
4.5999999	20.2334118
4.61999989	31.5839043
4.63999987	43.0445366
4.65999985	54.5929337
4.67999983	67.3706818
4.69999981	79.9248276
4.71999979	93.4064713
4.73999977	108.475143
4.75999975	126.375755
4.78000021	150.063736
4.80000019	180.303772
4.82000017	174.096634
4.84000015	167.201263
4.86000013	159.135895
4.88000011	104.644432
4.9000001	-39.4576607
4.92000008	-144.852524
4.94000006	-230.013809
4.96000004	-281.94397
4.98000002	-279.974152
5	-223.899323
5.01999998	-130.336014
5.03999996	-88.6936798
5.05999994	-63.2390137
5.07999992	-40.5615921
5.0999999	-19.1241875
5.11999989	-16.4146519
5.13999987	-10.1790314
5.15999985	-2.18694115
5.17999983	9.17251682
5.19999981	20.2583408
5.21999979	31.6100311
5.23999977	43.0782585
5.25999975	54.6135101
5.28000021	67.3840866
5.30000019	79.9261093
5.32000017	93.395546
5.34000015	108.441467
5.36000013	126.321854
5.38000011	149.943665
5.4000001	180.024277
5.42000008	173.843811
5.44000006	166.966385
5.46000004	158.909805
5.48000002	104.656555
5.5	-39.2564735
5.51999998	-144.649796
5.53999996	-229.830811
5.55999994	-281.784607
5.57999992	-279.866211
5.5999999	-223.818222
5.61999989	-130.318039
5.63999987	-88.7066574
5.65999985	-63.2498627
5.67999983	-40.5435753
5.69999981	-19.0884151
5.71999979	-16.3472042
5.73999977	-10.0980082
5.75999975	-2.10677195
5.78000021	9.25234509
5.80000019	20.332962
5.82000017	31.6783333
5.84000015	43.1250458
5.86000013	54.6596985
5.88000011	67.4299393
5.9000001	79.9608994
5.92000008	93.4239731
5.94000006	108.465881
5.96000004	126.331848
5.98000002	149.951416
6	180.014252
6.01999998	173.854187
6.03999996	167.001038
6.05999994	158.956223
6.07999992	104.714958
6.0999999	-39.2017021
6.11999989	-144.597641
6.13999987	-229.785812
6.15999985	-281.744629
6.17999983	-279.820282
6.19999981	-223.790558
6.21999979	-130.316299
6.23999977	-88.7252731
6.25999975	-63.2790604
6.28000021	-40.5833626
6.30000019	-19.1203461
6.32000017	-16.3629131
6.34000015	-10.103301
6.36000013	-2.11018705
6.38000011	9.25541878
6.4000001	20.3359489
6.42000008	31.6807232
6.44000006	43.1280365
6.46000004	54.6526146
6.48000002	67.4161072
6.5	79.9509506
6.51999998	93.4081345
6.53999996	108.446419
6.55999994	126.31781
