# Supplementary material for: Universal Walking Control Framework of Biped Robot Based on Dynamic Model and Quadratic Programming
Source: Hindawi journal article supplement (doi:10.1155/2020/2789039), 2020-10-31
Supplement: f1 [file 2789039.f1.zip › sim/speed hip roll]

0	0
0.0199999996	76.2976685
0.0399999991	3.15042472
0.0599999987	5.41653776
0.0799999982	7.69703054
0.099999994	9.90699768
0.120000005	11.832449
0.140000001	12.6376543
0.159999996	11.3673668
0.179999992	8.01372242
0.200000003	3.66060781
0.219999999	-0.392287642
0.239999995	-3.56600976
0.25999999	-5.93923378
0.280000001	-8.34457016
0.300000012	-11.0421648
0.320000023	-13.3846846
0.340000004	-14.8045425
0.360000014	-15.4506083
0.380000025	-15.44594
0.400000006	-14.8736715
0.420000017	-13.8955479
0.439999998	-12.5166864
0.460000008	-10.8158388
0.480000019	-8.84641743
0.5	-6.64603043
0.519999981	-4.24492884
0.539999962	-1.66228807
0.560000002	1.0865103
0.579999983	3.98787689
0.599999964	7.04392672
0.620000005	9.60756493
0.639999986	11.2136993
0.659999967	12.0971279
0.680000007	12.7295151
0.699999988	13.5891094
0.719999969	15.0994787
0.74000001	16.6139832
0.75999999	16.2889557
0.779999971	12.7870321
0.799999952	7.42814064
0.819999993	2.31739783
0.839999974	-1.53650439
0.859999955	-4.05020618
0.879999995	-6.48893595
0.899999976	-9.27355099
0.919999957	-11.7795267
0.939999998	-13.3967543
0.959999979	-14.2348089
0.979999959	-14.3617859
1	-13.9945459
1.01999998	-13.1143284
1.03999996	-11.8140917
1.05999994	-10.1814346
1.07999992	-8.26558971
1.10000002	-6.11475134
1.12	-3.77287412
1.13999999	-1.26758575
1.15999997	1.38303196
1.17999995	4.16361141
1.19999993	7.0733614
1.22000003	9.51711464
1.24000001	11.1399889
1.25999999	11.8551664
1.27999997	11.7297993
1.29999995	12.2944183
1.31999993	14.2123489
1.34000003	17.0750027
1.36000001	17.6246147
1.38	13.3637772
1.39999998	6.76398993
1.41999996	0.900784552
1.43999994	-1.76535845
1.46000004	-3.82939887
1.48000002	-6.18212175
1.5	-8.82772064
1.51999998	-11.0990791
1.53999996	-12.6968155
1.55999994	-13.61555
1.57999992	-13.8971672
1.60000002	-13.5949154
1.62	-12.7798815
1.63999999	-11.506237
1.65999997	-9.86536312
1.67999995	-7.93649483
1.69999993	-5.78687525
1.72000003	-3.46506047
1.74000001	-1.02706444
1.75999999	1.52061963
1.77999997	4.18142843
1.79999995	7.07706594
1.81999993	9.48465824
1.84000003	10.9439793
1.86000001	11.7058678
1.88	11.3539171
1.89999998	10.5432882
1.91999996	12.0041428
1.93999994	15.1296167
1.96000004	17.2366562
1.98000002	14.3313265
2	7.68988657
2.01999998	1.46229017
2.03999996	-1.15985155
2.05999994	-3.33815885
2.07999992	-5.76544809
2.0999999	-8.47809029
2.11999989	-10.8169279
2.13999987	-12.4622993
2.16000009	-13.3715792
2.18000007	-13.7405052
2.20000005	-13.4592533
2.22000003	-12.6644039
2.24000001	-11.4082756
2.25999999	-9.78031921
2.27999997	-7.86526442
2.29999995	-5.72529602
2.31999993	-3.41877794
2.33999991	-0.998188198
2.3599999	1.51734996
2.37999988	4.15908909
2.4000001	7.0220499
2.42000008	9.41092396
2.44000006	10.8702278
2.46000004	11.6169968
2.48000002	11.3285923
2.5	10.5773401
2.51999998	12.0341215
2.53999996	15.2515936
2.55999994	17.3638573
2.57999992	14.3694696
2.5999999	7.69996071
2.61999989	1.46541715
2.63999987	-1.17184699
2.66000009	-3.36478591
2.68000007	-5.79778481
2.70000005	-8.52240086
2.72000003	-10.8722954
2.74000001	-12.5169096
2.75999999	-13.4358044
2.77999997	-13.7847204
2.79999995	-13.5088825
2.81999993	-12.7050762
2.83999991	-11.4352942
2.8599999	-9.78466511
2.87999988	-7.84363651
2.9000001	-5.68592644
2.92000008	-3.3669045
2.94000006	-0.923939228
2.96000004	1.60989773
2.98000002	4.2476759
3	7.08301449
3.01999998	9.44694805
3.03999996	10.8846931
3.05999994	11.6132975
3.07999992	11.3218527
3.0999999	10.6176901
3.11999989	12.0620136
3.13999987	15.3252974
3.16000009	17.4455585
3.18000007	14.4314861
3.20000005	7.7881875
3.22000003	1.5630461
3.24000001	-1.07637382
3.25999999	-3.29232192
3.27999997	-5.75131798
3.29999995	-8.48964787
3.31999993	-10.8407059
3.33999991	-12.4950418
3.3599999	-13.4217596
3.37999988	-13.7763376
3.4000001	-13.4963827
3.42000008	-12.7013769
3.44000006	-11.4455614
3.46000004	-9.81739807
3.48000002	-7.89628029
3.5	-5.75923443
3.51999998	-3.45961833
3.53999996	-1.03994703
3.55999994	1.48220646
3.57999992	4.11828804
3.5999999	6.95958614
3.61999989	9.34068871
3.63999987	10.7928057
3.66000009	11.5334787
3.68000007	11.2812929
3.70000005	10.5495796
3.72000003	12.0458498
3.74000001	15.3157549
3.75999999	17.437088
3.77999997	14.4136105
3.79999995	7.7588501
3.81999993	1.5322783
3.83999991	-1.13207185
3.8599999	-3.32786036
3.87999988	-5.77744341
3.9000001	-8.50876236
3.92000008	-10.8639278
3.94000006	-12.5132484
3.96000004	-13.4425011
3.98000002	-13.7864656
4	-13.5104647
4.01999998	-12.7108412
4.03999996	-11.4525404
4.05999994	-9.82829762
4.07999992	-7.91075182
4.0999999	-5.76844215
4.11999989	-3.46480036
4.13999987	-1.04722953
4.15999985	1.47371817
4.17999983	4.1159811
4.19999981	6.9702282
4.21999979	9.35434055
4.23999977	10.8079939
4.25999975	11.5412664
4.28000021	11.3060741
4.30000019	10.586031
4.32000017	12.0781765
4.34000015	15.3524466
4.36000013	17.4669762
4.38000011	14.4075155
4.4000001	7.72038746
4.42000008	1.4842962
4.44000006	-1.16581726
4.46000004	-3.35684586
4.48000002	-5.80495644
4.5	-8.52115154
4.51999998	-10.8618479
4.53999996	-12.5077257
4.55999994	-13.4327736
4.57999992	-13.7735949
4.5999999	-13.4942026
4.61999989	-12.6902466
4.63999987	-11.4312325
4.65999985	-9.80967903
4.67999983	-7.8910141
4.69999981	-5.74563313
4.71999979	-3.43340683
4.73999977	-1.00751305
4.75999975	1.52390528
4.78000021	4.16506815
4.80000019	7.01314354
4.82000017	9.39145947
4.84000015	10.8305826
4.86000013	11.5535583
4.88000011	11.3063593
4.9000001	10.5991602
4.92000008	12.0658655
4.94000006	15.3251686
4.96000004	17.4397202
4.98000002	14.3978252
5	7.76334238
5.01999998	1.57966268
5.03999996	-1.06254268
5.05999994	-3.26203442
5.07999992	-5.72458458
5.0999999	-8.45777035
5.11999989	-10.8303967
5.13999987	-12.4806452
5.15999985	-13.4212475
5.17999983	-13.7739086
5.19999981	-13.4903555
5.21999979	-12.6920071
5.23999977	-11.4331322
5.25999975	-9.80740643
5.28000021	-7.88636541
5.30000019	-5.7411499
5.32000017	-3.43540645
5.34000015	-1.01773429
5.36000013	1.50611353
5.38000011	4.14442015
5.4000001	6.99353695
5.42000008	9.36821461
5.44000006	10.8126793
5.46000004	11.5512514
5.48000002	11.2987337
5.5	10.587122
5.51999998	12.0453911
5.53999996	15.3265772
5.55999994	17.4517784
5.57999992	14.3986044
5.5999999	7.7269187
5.61999989	1.49635577
5.63999987	-1.14810145
5.65999985	-3.33624864
5.67999983	-5.79203272
5.69999981	-8.52043724
5.71999979	-10.8790722
5.73999977	-12.523633
5.75999975	-13.4573145
5.78000021	-13.7963476
5.80000019	-13.5159388
5.82000017	-12.7094688
5.84000015	-11.4471121
5.86000013	-9.81723213
5.88000011	-7.89674282
5.9000001	-5.75969458
5.92000008	-3.45749974
5.94000006	-1.03514063
5.96000004	1.49931061
5.98000002	4.14809465
6	7.00448418
6.01999998	9.38598156
6.03999996	10.8287983
6.05999994	11.5685806
6.07999992	11.3147392
6.0999999	10.5982523
6.11999989	12.0498199
6.13999987	15.3343725
6.15999985	17.456768
6.17999983	14.4073877
6.19999981	7.72843409
6.21999979	1.49001646
6.23999977	-1.17392814
6.25999975	-3.37085843
6.28000021	-5.82399559
6.30000019	-8.54880428
6.32000017	-10.8986559
6.34000015	-12.5427246
6.36000013	-13.4741011
6.38000011	-13.8178091
6.4000001	-13.5289431
6.42000008	-12.7209234
6.44000006	-11.45294
6.46000004	-9.81754303
6.48000002	-7.88700819
6.5	-5.7399354
6.51999998	-3.42313552
6.53999996	-0.995923042
6.55999994	1.53240442
