# Supplementary material for: Universal Walking Control Framework of Biped Robot Based on Dynamic Model and Quadratic Programming
Source: Hindawi journal article supplement (doi:10.1155/2020/2789039), 2020-10-31
Supplement: f1 [file 2789039.f1.zip › sim/speed hip yaw]

0	0
0.0199999996	-16.8244743
0.0399999991	-0.640909195
0.0599999987	-1.48760056
0.0799999982	-4.39950371
0.099999994	-8.05041885
0.120000005	-11.4002323
0.140000001	-12.6462393
0.159999996	-10.2026968
0.179999992	-4.95712709
0.200000003	0.611424685
0.219999999	4.86091757
0.239999995	6.89724827
0.25999999	6.73662138
0.280000001	6.12268829
0.300000012	5.6176362
0.320000023	5.13156939
0.340000004	4.7924161
0.360000014	4.57030392
0.380000025	4.34612989
0.400000006	4.12894535
0.420000017	3.81794143
0.439999998	3.55812526
0.460000008	3.16699266
0.480000019	2.76146746
0.5	2.22055984
0.519999981	1.57600117
0.539999962	0.864135504
0.560000002	0.0790972933
0.579999983	-0.84994024
0.599999964	-1.86159539
0.620000005	-2.88187099
0.639999986	-3.51304245
0.659999967	-4.55819225
0.680000007	-7.51924372
0.699999988	-11.3251057
0.719999969	-14.1051579
0.74000001	-13.9773102
0.75999999	-9.12672901
0.779999971	-1.78004873
0.799999952	4.55229998
0.819999993	8.26928329
0.839999974	9.44917202
0.859999955	8.03764343
0.879999995	6.20724964
0.899999976	4.83012581
0.919999957	3.96900153
0.939999998	3.53206301
0.959999979	3.36998343
0.979999959	3.08657312
1	3.13138556
1.01999998	3.10242605
1.03999996	3.01055884
1.05999994	2.82648706
1.07999992	2.45432925
1.10000002	2.00432038
1.12	1.40734804
1.13999999	0.656357884
1.15999997	-0.205463305
1.17999995	-1.1855123
1.19999993	-2.21767473
1.22000003	-2.97630119
1.24000001	-3.02028823
1.25999999	-3.98110127
1.27999997	-7.91258144
1.29999995	-12.0138187
1.31999993	-15.1427431
1.34000003	-14.1917095
1.36000001	-7.03448153
1.38	2.31394529
1.39999998	8.86626339
1.41999996	12.0815859
1.43999994	10.7113161
1.46000004	8.24474239
1.48000002	6.01987123
1.5	4.06513643
1.51999998	2.42806983
1.53999996	1.66557503
1.55999994	1.44431818
1.57999992	1.5361743
1.60000002	1.77395356
1.62	2.0454669
1.63999999	2.18620706
1.65999997	2.16099191
1.67999995	1.96873391
1.69999993	1.54044747
1.72000003	0.967758834
1.74000001	0.181211457
1.75999999	-0.68817395
1.77999997	-1.56270957
1.79999995	-2.12427306
1.81999993	-3.08513117
1.84000003	-4.02957821
1.86000001	-4.57784367
1.88	-6.37698603
1.89999998	-12.1073551
1.91999996	-16.0212746
1.93999994	-16.1155853
1.96000004	-9.27453804
1.98000002	1.50797236
2	9.18238926
2.01999998	12.7629128
2.03999996	11.106739
2.05999994	8.61625481
2.07999992	6.32806349
2.0999999	4.33159924
2.11999989	2.70600891
2.13999987	1.94608104
2.16000009	1.72074342
2.18000007	1.78470314
2.20000005	1.97328711
2.22000003	2.21711802
2.24000001	2.33197975
2.25999999	2.31085229
2.27999997	2.07284904
2.29999995	1.62169349
2.31999993	0.992874742
2.33999991	0.227969259
2.3599999	-0.674777687
2.37999988	-1.55727279
2.4000001	-2.20286512
2.42000008	-3.20432401
2.44000006	-4.07211304
2.46000004	-4.66519594
2.48000002	-6.37555933
2.5	-12.0773869
2.51999998	-16.0355625
2.53999996	-16.1835785
2.55999994	-9.26583481
2.57999992	1.5187726
2.5999999	9.20493412
2.61999989	12.7675295
2.63999987	11.1097698
2.66000009	8.62942696
2.68000007	6.34757233
2.70000005	4.37021112
2.72000003	2.77497125
2.74000001	2.00964189
2.75999999	1.81588924
2.77999997	1.80119562
2.79999995	2.04520631
2.81999993	2.27069521
2.83999991	2.39112592
2.8599999	2.34795213
2.87999988	2.08883548
2.9000001	1.65246427
2.92000008	1.00527787
2.94000006	0.209337965
2.96000004	-0.707042336
2.98000002	-1.60067892
3	-2.27864957
3.01999998	-3.29528499
3.03999996	-4.16832781
3.05999994	-4.76271677
3.07999992	-6.51975012
3.0999999	-12.0623159
3.11999989	-16.0771217
3.13999987	-16.1916218
3.16000009	-9.22846603
3.18000007	1.58125818
3.20000005	9.26840687
3.22000003	12.8210449
3.24000001	11.1471653
3.25999999	8.65682793
3.27999997	6.37007856
3.29999995	4.39064217
3.31999993	2.78063416
3.33999991	2.04054689
3.3599999	1.84228563
3.37999988	1.85630202
3.4000001	2.02937603
3.42000008	2.25344133
3.44000006	2.35717654
3.46000004	2.34835386
3.48000002	2.0868268
3.5	1.66478622
3.51999998	1.0368284
3.53999996	0.229220882
3.55999994	-0.683091342
3.57999992	-1.58602095
3.5999999	-2.28019381
3.61999989	-3.28861928
3.63999987	-4.16605806
3.66000009	-4.76486683
3.68000007	-6.41284418
3.70000005	-12.1108313
3.72000003	-16.0231476
3.74000001	-16.1583977
3.75999999	-9.201828
3.77999997	1.57177067
3.79999995	9.23334885
3.81999993	12.7501974
3.83999991	11.1069689
3.8599999	8.61889648
3.87999988	6.34877586
3.9000001	4.37217617
3.92000008	2.78393173
3.94000006	2.02950931
3.96000004	1.8649379
3.98000002	1.84465337
4	2.08238053
4.01999998	2.28448963
4.03999996	2.39815855
4.05999994	2.3578279
4.07999992	2.1047318
4.0999999	1.67923629
4.11999989	1.05670023
4.13999987	0.248426795
4.15999985	-0.666255295
4.17999983	-1.5905236
4.19999981	-2.27473021
4.21999979	-3.30595493
4.23999977	-4.18843174
4.25999975	-4.88530922
4.28000021	-6.41088629
4.30000019	-12.0857105
4.32000017	-15.9989777
4.34000015	-16.1630077
4.36000013	-9.22158813
4.38000011	1.55256605
4.4000001	9.22425079
4.42000008	12.7489386
4.44000006	11.1002188
4.46000004	8.62025356
4.48000002	6.37605953
4.5	4.39504004
4.51999998	2.79237342
4.53999996	2.0522933
4.55999994	1.88770759
4.57999992	1.86714172
4.5999999	2.10506487
4.61999989	2.28998208
4.63999987	2.42071342
4.65999985	2.38460827
4.67999983	2.1218102
4.69999981	1.66864002
4.71999979	1.04357827
4.73999977	0.252724022
4.75999975	-0.660523295
4.78000021	-1.59222615
4.80000019	-2.28021431
4.82000017	-3.29853463
4.84000015	-4.19383478
4.86000013	-4.89235735
4.88000011	-6.42224979
4.9000001	-12.0559006
4.92000008	-16.0265274
4.94000006	-16.1998539
4.96000004	-9.23523235
4.98000002	1.54053319
5	9.21284771
5.01999998	12.7449312
5.03999996	11.1190901
5.05999994	8.63061428
5.07999992	6.37170076
5.0999999	4.38471603
5.11999989	2.80823922
5.13999987	2.01541805
5.15999985	1.8796314
5.17999983	1.89670682
5.19999981	2.07017112
5.21999979	2.27771449
5.23999977	2.39302754
5.25999975	2.36021137
5.28000021	2.11047339
5.30000019	1.67104602
5.32000017	1.043239
5.34000015	0.233774915
5.36000013	-0.681892395
5.38000011	-1.61069238
5.4000001	-2.30410004
5.42000008	-3.33391213
5.44000006	-4.21952581
5.46000004	-4.80942869
5.48000002	-6.43479109
5.5	-12.0466385
5.51999998	-16.0210152
5.53999996	-16.2082367
5.55999994	-9.24127293
5.57999992	1.54691517
5.5999999	9.23172665
5.61999989	12.7833509
5.63999987	11.1351271
5.65999985	8.63737202
5.67999983	6.38450098
5.69999981	4.40664101
5.71999979	2.81705022
5.73999977	2.03452253
5.75999975	1.89747679
5.78000021	1.8740505
5.80000019	2.11082602
5.82000017	2.29352784
5.84000015	2.41002107
5.86000013	2.38714743
5.88000011	2.13692546
5.9000001	1.68352187
5.92000008	1.05976486
5.94000006	0.257097274
5.96000004	-0.654014647
5.98000002	-1.59091616
6	-2.29436946
6.01999998	-3.3196373
6.03999996	-4.21863842
6.05999994	-4.8117981
6.07999992	-6.43768358
6.0999999	-12.055891
6.11999989	-16.0541916
6.13999987	-16.2297726
6.15999985	-9.26823044
6.17999983	1.52800405
6.19999981	9.20629978
6.21999979	12.7629986
6.23999977	11.1241369
6.25999975	8.62393856
6.28000021	6.36378098
6.30000019	4.38852358
6.32000017	2.79930902
6.34000015	2.03694129
6.36000013	1.90421808
6.38000011	1.92209804
6.4000001	2.11854124
6.42000008	2.3197701
6.44000006	2.4339242
6.46000004	2.38387918
6.48000002	2.15087795
6.5	1.69354546
6.51999998	1.06499755
6.53999996	0.252822399
6.55999994	-0.664857209
