# Supplementary material for: Universal Walking Control Framework of Biped Robot Based on Dynamic Model and Quadratic Programming
Source: Hindawi journal article supplement (doi:10.1155/2020/2789039), 2020-10-31
Supplement: f1 [file 2789039.f1.zip › sim/speed knee pitch]

0	0
0.0199999996	1054.26477
0.0399999991	-0.855908096
0.0599999987	24.6637287
0.0799999982	104.524261
0.099999994	185.920578
0.120000005	238.390839
0.140000001	248.893127
0.159999996	215.251541
0.179999992	143.953934
0.200000003	45.9559021
0.219999999	-57.3766632
0.239999995	-134.483688
0.25999999	-141.046661
0.280000001	-121.932198
0.300000012	-105.284973
0.320000023	-87.5051422
0.340000004	-73.1390305
0.360000014	-61.5785942
0.380000025	-52.310627
0.400000006	-44.9138718
0.420000017	-39.1587563
0.439999998	-34.6412697
0.460000008	-31.2117443
0.480000019	-28.7562923
0.5	-27.1695538
0.519999981	-26.4318924
0.539999962	-26.5481777
0.560000002	-27.5738163
0.579999983	-29.6066513
0.599999964	-32.8369026
0.620000005	-39.6712761
0.639999986	-47.1727867
0.659999967	-20.3157997
0.680000007	83.1683121
0.699999988	183.37001
0.719999969	248.950424
0.74000001	265.380707
0.75999999	229.321915
0.779999971	147.83432
0.799999952	36.7873993
0.819999993	-82.1822052
0.839999974	-173.949722
0.859999955	-171.207748
0.879999995	-133.433212
0.899999976	-101.54818
0.919999957	-76.1825638
0.939999998	-57.0308838
0.959999979	-42.9329491
0.979999959	-32.8214493
1	-25.8313484
1.01999998	-21.3095074
1.03999996	-18.9437866
1.05999994	-18.2451439
1.07999992	-19.0991726
1.10000002	-21.4149494
1.12	-25.2105694
1.13999999	-30.598053
1.15999997	-37.8562393
1.17999995	-50.0056076
1.19999993	-63.813179
1.22000003	-93.8620834
1.24000001	-138.761963
1.25999999	-107.928429
1.27999997	65.040947
1.29999995	201.879517
1.31999993	286.344086
1.34000003	307.899658
1.36000001	261.856323
1.38	157.325729
1.39999998	14.0939245
1.41999996	-152.065277
1.43999994	-185.439819
1.46000004	-165.165588
1.48000002	-146.495941
1.5	-130.713425
1.51999998	-76.0162506
1.53999996	-37.2465591
1.55999994	-12.1389542
1.57999992	3.211555
1.60000002	11.649827
1.62	14.9878254
1.63999999	14.2322359
1.65999997	8.32659817
1.67999995	0.508592963
1.69999993	-10.5206261
1.72000003	-25.2029705
1.74000001	-44.5966949
1.75999999	-71.2394714
1.77999997	-111.859886
1.79999995	-171.742599
1.81999993	-153.88324
1.84000003	-137.759415
1.86000001	-125.89962
1.88	-29.8133488
1.89999998	209.134705
1.91999996	326.339539
1.93999994	356.270782
1.96000004	325.040497
1.98000002	214.745926
2	60.0542679
2.01999998	-118.418922
2.03999996	-144.621323
2.05999994	-131.133835
2.07999992	-117.863113
2.0999999	-106.403587
2.11999989	-56.8448486
2.13999987	-22.0796108
2.16000009	1.81964779
2.18000007	13.2362242
2.20000005	19.9439812
2.22000003	25.6186733
2.24000001	19.456562
2.25999999	14.5015163
2.27999997	4.48982477
2.29999995	-6.96226788
2.31999993	-21.8842678
2.33999991	-41.3416824
2.3599999	-67.6425247
2.37999988	-106.881531
2.4000001	-162.419312
2.42000008	-145.916321
2.44000006	-131.201019
2.46000004	-119.940048
2.48000002	-30.2607708
2.5	203.473862
2.51999998	320.653473
2.53999996	353.633484
2.55999994	320.26059
2.57999992	210.911301
2.5999999	57.27882
2.61999989	-119.425354
2.63999987	-144.751862
2.66000009	-131.033157
2.68000007	-117.705338
2.70000005	-106.266052
2.72000003	-57.6473083
2.74000001	-23.3174973
2.75999999	0.410238236
2.77999997	11.8116169
2.79999995	18.5750408
2.81999993	20.5882397
2.83999991	18.8622513
2.8599999	13.9863491
2.87999988	4.15898752
2.9000001	-7.23368263
2.92000008	-22.0662918
2.94000006	-41.3404045
2.96000004	-67.3145065
2.98000002	-105.789726
3	-159.288849
3.01999998	-143.319138
3.03999996	-129.128479
3.05999994	-118.148384
3.07999992	-31.3690109
3.0999999	200.464294
3.11999989	317.687592
3.13999987	352.25354
3.16000009	317.754669
3.18000007	208.889557
3.20000005	55.7326355
3.22000003	-120.340424
3.24000001	-145.434875
3.25999999	-131.684174
3.27999997	-118.328934
3.29999995	-106.852936
3.31999993	-58.4065742
3.33999991	-24.1171417
3.3599999	-0.382490605
3.37999988	11.0830069
3.4000001	17.9195995
3.42000008	23.3418293
3.44000006	17.8851929
3.46000004	13.1456385
3.48000002	3.4144969
3.5	-7.83482456
3.51999998	-22.540905
3.53999996	-41.678669
3.55999994	-67.4890976
3.57999992	-105.733978
3.5999999	-158.668594
3.61999989	-142.828049
3.63999987	-128.767731
3.66000009	-117.855545
3.68000007	-31.6132545
3.70000005	199.52652
3.72000003	316.78363
3.74000001	351.836914
3.75999999	316.998322
3.77999997	208.271088
3.79999995	55.2644272
3.81999993	-120.524498
3.83999991	-145.374084
3.8599999	-131.56694
3.87999988	-118.205727
3.9000001	-106.771736
3.92000008	-58.4645424
3.94000006	-24.2628803
3.96000004	-0.56442976
3.98000002	10.8878336
4	17.719902
4.01999998	25.9002476
4.03999996	17.3128223
4.05999994	12.6310692
4.07999992	3.017663
4.0999999	-8.16822338
4.11999989	-22.791914
4.13999987	-41.8371277
4.15999985	-67.5629578
4.17999983	-105.612404
4.19999981	-158.086441
4.21999979	-142.219482
4.23999977	-128.179565
4.25999975	-117.231308
4.28000021	-31.6463165
4.30000019	198.91806
4.32000017	316.157043
4.34000015	351.544464
4.36000013	316.457092
4.38000011	207.810562
4.4000001	54.9232597
4.42000008	-120.64386
4.44000006	-145.379547
4.46000004	-131.510254
4.48000002	-118.072884
4.5	-106.605423
4.51999998	-58.4544678
4.53999996	-24.3263168
4.55999994	-0.676018
4.57999992	10.7498646
4.5999999	17.5593071
4.61999989	19.6425152
4.63999987	17.9488831
4.65999985	13.1306973
4.67999983	3.39725065
4.69999981	-7.86077929
4.71999979	-22.5426121
4.73999977	-41.6297455
4.75999975	-67.3364487
4.78000021	-105.330658
4.80000019	-157.579468
4.82000017	-141.751785
4.84000015	-127.734962
4.86000013	-116.788666
4.88000011	-31.5750256
4.9000001	198.707565
4.92000008	315.927521
4.94000006	351.438019
4.96000004	316.266449
4.98000002	207.647659
5	54.8267822
5.01999998	-120.610558
5.03999996	-145.299469
5.05999994	-131.42897
5.07999992	-117.977013
5.0999999	-106.520218
5.11999989	-58.4331245
5.13999987	-24.3527832
5.15999985	-0.728439689
5.17999983	10.6873674
5.19999981	17.4884434
5.21999979	19.5700283
5.23999977	17.8685436
5.25999975	13.0847645
5.28000021	3.37795544
5.30000019	-7.83559322
5.32000017	-22.4786644
5.34000015	-41.5225143
5.36000013	-67.1748276
5.38000011	-105.034737
5.4000001	-156.957031
5.42000008	-141.182663
5.44000006	-127.203697
5.46000004	-116.275131
5.48000002	-31.5520802
5.5	198.326569
5.51999998	315.527618
5.53999996	351.247955
5.55999994	315.919983
5.57999992	207.411514
5.5999999	54.6628571
5.61999989	-120.6343
5.63999987	-145.265671
5.65999985	-131.407639
5.67999983	-118.003899
5.69999981	-106.550873
5.71999979	-58.5504303
5.73999977	-24.4926319
5.75999975	-0.866324127
5.78000021	10.5540085
5.80000019	17.3711357
5.82000017	19.467577
5.84000015	17.8106575
5.86000013	13.0349035
5.88000011	3.31323934
5.9000001	-7.89236927
5.92000008	-22.5327091
5.94000006	-41.5698967
5.96000004	-67.2038574
5.98000002	-105.059242
6	-156.951218
6.01999998	-141.224487
6.03999996	-127.297874
6.05999994	-116.396179
6.07999992	-31.6978436
6.0999999	198.191757
6.11999989	315.406036
6.13999987	351.190857
6.15999985	315.815063
6.17999983	207.303253
6.19999981	54.5896034
6.21999979	-120.656494
6.23999977	-145.244995
6.25999975	-131.363068
6.28000021	-117.947548
6.30000019	-106.508865
6.32000017	-58.5410385
6.34000015	-24.499548
6.36000013	-0.877081692
6.38000011	10.5358229
6.4000001	17.3568764
6.42000008	19.4627094
6.44000006	17.8100605
6.46000004	13.0578709
6.48000002	3.36933231
6.5	-7.84481382
6.51999998	-22.4682484
6.53999996	-41.5019379
6.55999994	-67.140419
