# Supplementary material for: Universal Walking Control Framework of Biped Robot Based on Dynamic Model and Quadratic Programming
Source: Hindawi journal article supplement (doi:10.1155/2020/2789039), 2020-10-31
Supplement: f1 [file 2789039.f1.zip › sim/torque ankle pitch]

0.0199999996	3.04594128e-15
0.0399999991	-5.88106994e-12
0.0599999987	-1.86833535e-12
0.0799999982	1.47154424e-11
0.099999994	1.42031242e-09
0.120000005	4.85511187e-10
0.140000001	4.23360125e-10
0.159999996	2.86952961e-10
0.179999992	1.06678194e-10
0.200000003	-6.05370892e-11
0.219999999	-1.18812071e-10
0.239999995	-5.34590497e-11
0.25999999	1.11939444e-10
0.280000001	1.7156554e-10
0.300000012	1.72704781e-10
0.320000023	2.12138057e-10
0.340000004	2.05600773e-10
0.360000014	8.73568717e-11
0.380000025	-2.48243065e-10
0.400000006	103.259956
0.420000017	10.0744762
0.439999998	51.1961365
0.460000008	56.8591537
0.480000019	51.0815964
0.5	56.2548561
0.519999981	63.5870819
0.539999962	56.9995346
0.560000002	50.2148628
0.579999983	50.6058922
0.599999964	39.4356689
0.620000005	16.6768723
0.639999986	53.7604942
0.659999967	33.8359146
0.680000007	5.66588831
0.699999988	1.90247941
0.719999969	1.5173478e-09
0.74000001	1.21087562e-09
0.75999999	1.12363641e-09
0.779999971	6.4065464e-10
0.799999952	3.00456715e-10
0.819999993	-4.20041502e-11
0.839999974	-1.65704894e-10
0.859999955	-1.24094873e-10
0.879999995	-1.04480258e-10
0.899999976	-1.05748216e-10
0.919999957	-7.1241818e-11
0.939999998	-6.77520332e-11
0.959999979	-2.18545182e-10
0.979999959	-6.4755834e-10
1	-49.1703415
1.01999998	-264.051331
1.03999996	-99.1775131
1.05999994	-92.3849182
1.07999992	-61.695713
1.10000002	24.8850136
1.12	38.9695854
1.13999999	56.9592934
1.15999997	59.9727936
1.17999995	65.0312653
1.19999993	63.6910858
1.22000003	67.6138
1.24000001	68.1103516
1.25999999	35.1134529
1.27999997	-0.222835228
1.29999995	5.03451114e-10
1.31999993	1.07939535e-09
1.34000003	1.87729987e-09
1.36000001	1.52736745e-09
1.38	1.11959841e-09
1.39999998	7.09197034e-10
1.41999996	1.03322587e-10
1.43999994	9.21866583e-10
1.46000004	-3.24167443e-10
1.48000002	-7.92863553e-10
1.5	-6.78423651e-10
1.51999998	-2.05744102e-10
1.53999996	-2.00974987e-10
1.55999994	-3.47826434e-10
1.57999992	-8.61182958e-10
1.60000002	-8.70992833e-10
1.62	193.89032
1.63999999	74.7251816
1.65999997	3.2122097
1.67999995	28.9318123
1.69999993	14.2403374
1.72000003	16.8352184
1.74000001	-2.36862779
1.75999999	17.1173058
1.77999997	50.9290733
1.79999995	-1.56912708
1.81999993	-22.0419731
1.84000003	-120.939362
1.86000001	-66.4498138
1.88	7.53815603
1.89999998	4.29192099e-10
1.91999996	6.23025631e-10
1.93999994	2.38937958e-09
1.96000004	2.11853224e-09
1.98000002	1.57451718e-09
2	5.88688431e-10
2.01999998	-6.22438906e-11
2.03999996	1.07910603e-09
2.05999994	-5.03219466e-10
2.07999992	-1.02450592e-09
2.0999999	-7.99737443e-10
2.11999989	-2.56289212e-10
2.13999987	-2.28996752e-10
2.16000009	-4.71706674e-10
2.18000007	-8.96233143e-10
2.20000005	-9.66682401e-10
2.22000003	156.297058
2.24000001	74.2304764
2.25999999	-8.50752831
2.27999997	-11.9016724
2.29999995	16.1284599
2.31999993	-20.062418
2.33999991	6.99856663
2.3599999	34.1481934
2.37999988	50.8642197
2.4000001	21.8755722
2.42000008	-87.6477737
2.44000006	-96.8774719
2.46000004	-65.3098526
2.48000002	6.64359999
2.5	4.49685345e-10
2.51999998	5.97515037e-10
2.53999996	2.48012455e-09
2.55999994	2.04606687e-09
2.57999992	1.47676937e-09
2.5999999	5.41757583e-10
2.61999989	1.5114382e-11
2.63999987	1.07672504e-09
2.66000009	-5.52691726e-10
2.68000007	-1.03066833e-09
2.70000005	-8.58055627e-10
2.72000003	-2.49261223e-10
2.74000001	-2.28336655e-10
2.75999999	-4.64861011e-10
2.77999997	-9.10812537e-10
2.79999995	-9.61765445e-10
2.81999993	143.126617
2.83999991	16.9506683
2.8599999	-80.4514313
2.87999988	-120.61351
2.9000001	-84.3754196
2.92000008	-63.325222
2.94000006	-29.0958576
2.96000004	22.2306747
2.98000002	41.6176147
3	49.5766296
3.01999998	-84.0158234
3.03999996	-99.8954468
3.05999994	-67.7103729
3.07999992	6.65004158
3.0999999	4.4980894e-10
3.11999989	9.389306e-10
3.13999987	1.94415617e-09
3.16000009	2.10041162e-09
3.18000007	1.35455391e-09
3.20000005	4.7139842e-10
3.22000003	2.28748312e-10
3.24000001	1.1440543e-09
3.25999999	-5.28215582e-10
3.27999997	-1.06112508e-09
3.29999995	-8.4079127e-10
3.31999993	-3.02009528e-10
3.33999991	-2.31062627e-10
3.3599999	-4.58449334e-10
3.37999988	-9.9603592e-10
3.4000001	-9.58131463e-10
3.42000008	145.500458
3.44000006	41.201973
3.46000004	-152.716736
3.48000002	-97.9041901
3.5	-82.4506378
3.51999998	-77.3807526
3.53999996	-89.0941849
3.55999994	-43.1769028
3.57999992	16.6734238
3.5999999	-58.5976295
3.61999989	-90.8847809
3.63999987	-98.3784866
3.66000009	-67.2270966
3.68000007	6.75436258
3.70000005	4.52621857e-10
3.72000003	6.8353162e-10
3.74000001	2.25862506e-09
3.75999999	2.00598627e-09
3.77999997	1.43266776e-09
3.79999995	6.97778502e-10
3.81999993	-4.35007308e-11
3.83999991	1.03822684e-09
3.8599999	-4.7669052e-10
3.87999988	-1.00023656e-09
3.9000001	-8.41342995e-10
3.92000008	-3.14197446e-10
3.94000006	-2.22906527e-10
3.96000004	-4.64614458e-10
3.98000002	-8.84218254e-10
4	-9.57769863e-10
4.01999998	157.157883
4.03999996	22.4311867
4.05999994	-13.2456083
4.07999992	-129.058228
4.0999999	-87.2590332
4.11999989	-77.7765427
4.13999987	-65.3083954
4.15999985	-30.6210899
4.17999983	25.2721481
4.19999981	30.6821938
4.21999979	-91.9441071
4.23999977	-97.4703293
4.25999975	-65.9515305
4.28000021	6.83539534
4.30000019	4.59245836e-10
4.32000017	7.98148436e-10
4.34000015	2.14291695e-09
4.36000013	2.08589901e-09
4.38000011	1.46865464e-09
4.4000001	5.71016512e-10
4.42000008	-7.51286533e-12
4.44000006	1.02043196e-09
4.46000004	-5.11839571e-10
4.48000002	-9.92719906e-10
4.5	-8.32487523e-10
4.51999998	-2.70344608e-10
4.53999996	-2.20181845e-10
4.55999994	-4.54930982e-10
4.57999992	-8.8440455e-10
4.5999999	-9.57509516e-10
4.61999989	187.536728
4.63999987	-37.6094284
4.65999985	-109.507347
4.67999983	-84.7986755
4.69999981	-62.6181641
4.71999979	-2.3325386
4.73999977	53.3554268
4.75999975	64.210289
4.78000021	60.2185707
4.80000019	30.4362373
4.82000017	-93.120575
4.84000015	-90.7054367
4.86000013	-69.0390015
4.88000011	7.49551439
4.9000001	4.62996613e-10
4.92000008	5.7441607e-10
4.94000006	2.00622474e-09
4.96000004	2.35154674e-09
4.98000002	1.69082626e-09
5	5.54850055e-10
5.01999998	-3.73357734e-11
5.03999996	1.13667087e-09
5.05999994	-4.92034857e-10
5.07999992	-1.01063458e-09
5.0999999	-7.98455302e-10
5.11999989	-2.78051582e-10
5.13999987	-2.22892219e-10
5.15999985	-4.6902382e-10
5.17999983	-9.00817754e-10
5.19999981	-9.57689039e-10
5.21999979	152.164703
5.23999977	25.0765324
5.25999975	11.9976978
5.28000021	1.46463394
5.30000019	-2.55232882
5.32000017	0.647017241
5.34000015	18.5116234
5.36000013	32.8934898
5.38000011	46.0323906
5.4000001	24.3720169
5.42000008	-87.4152222
5.44000006	-98.9823608
5.46000004	-66.0451431
5.48000002	6.80637407
5.5	4.64789707e-10
5.51999998	7.99781574e-10
5.53999996	2.30594144e-09
5.55999994	2.17274998e-09
5.57999992	1.2702116e-09
5.5999999	5.8344618e-10
5.61999989	-2.5689631e-11
5.63999987	1.0554867e-09
5.65999985	-4.98234121e-10
5.67999983	-1.00112751e-09
5.69999981	-8.07805822e-10
5.71999979	-2.91330182e-10
5.73999977	-2.22232927e-10
5.75999975	-4.71408523e-10
5.78000021	-8.86760831e-10
5.80000019	-9.57446677e-10
5.82000017	201.141922
5.84000015	30.1806717
5.86000013	-79.5144272
5.88000011	-54.0369911
5.9000001	-74.5619888
5.92000008	-45.5071182
5.94000006	-19.1390057
5.96000004	13.3313951
5.98000002	42.0219765
6	29.3103523
6.01999998	-86.0773163
6.03999996	-98.7447433
6.05999994	-66.9883728
6.07999992	9.67888832
6.0999999	4.64840055e-10
6.11999989	8.51125059e-10
6.13999987	2.13711848e-09
6.15999985	2.23867991e-09
6.17999983	1.54637703e-09
6.19999981	5.59136626e-10
6.21999979	-2.20277546e-11
6.23999977	1.02946041e-09
6.25999975	-5.17692444e-10
6.28000021	-1.01813313e-09
6.30000019	-8.41945236e-10
6.32000017	-2.62088101e-10
6.34000015	-2.19649215e-10
6.36000013	-4.70065153e-10
6.38000011	-9.28879917e-10
6.4000001	-9.58561897e-10
6.42000008	199.580566
6.44000006	61.6199417
6.46000004	-66.1194153
6.48000002	-75.6264954
6.5	-67.8419495
6.51999998	-48.9097748
6.53999996	-16.1640015
6.55999994	21.732605
