# Supplementary material for: Universal Walking Control Framework of Biped Robot Based on Dynamic Model and Quadratic Programming
Source: Hindawi journal article supplement (doi:10.1155/2020/2789039), 2020-10-31
Supplement: f1 [file 2789039.f1.zip › sim/torque ankle roll]

0.0199999996	1.18848675e-16
0.0399999991	-1.33737396e-11
0.0599999987	6.37533646e-12
0.0799999982	4.16169252e-11
0.099999994	2.163517e-10
0.120000005	2.03944205e-11
0.140000001	7.70980328e-12
0.159999996	1.16455786e-11
0.179999992	1.94471834e-11
0.200000003	1.87146236e-11
0.219999999	1.04812721e-11
0.239999995	8.86047832e-12
0.25999999	2.54351852e-11
0.280000001	1.91226288e-11
0.300000012	6.26265532e-12
0.320000023	1.50165904e-11
0.340000004	3.21600593e-11
0.360000014	3.40470048e-11
0.380000025	1.45006472e-11
0.400000006	75.3842392
0.420000017	52.9628067
0.439999998	24.1196957
0.460000008	24.4825096
0.480000019	3.70964813
0.5	8.98939323
0.519999981	-22.0277061
0.539999962	-50.5840378
0.560000002	-32.8819504
0.579999983	-17.664217
0.599999964	-24.7484074
0.620000005	-63.1488342
0.639999986	-20.9082603
0.659999967	-30.158844
0.680000007	-1.61152267
0.699999988	0.865839243
0.719999969	4.74318473e-10
0.74000001	1.24814326e-10
0.75999999	-6.98040029e-11
0.779999971	-1.37328454e-10
0.799999952	-2.6418509e-10
0.819999993	-2.74682638e-11
0.839999974	-8.49680049e-11
0.859999955	8.3613047e-12
0.879999995	4.34804727e-11
0.899999976	1.2745781e-11
0.919999957	6.60369676e-12
0.939999998	2.29242909e-11
0.959999979	3.0136213e-11
0.979999959	-3.38186076e-13
1	29.6543369
1.01999998	-6.59949493
1.03999996	-61.1336365
1.05999994	-62.2999306
1.07999992	-67.3703384
1.10000002	-41.3950386
1.12	-40.4471893
1.13999999	-31.5709534
1.15999997	-53.5209084
1.17999995	-47.8210983
1.19999993	-68.2549896
1.22000003	-68.5237274
1.24000001	-71.7550583
1.25999999	-38.5783119
1.27999997	1.35244942
1.29999995	1.81080498e-10
1.31999993	2.19895255e-10
1.34000003	4.85066709e-10
1.36000001	2.62616373e-10
1.38	1.24469587e-10
1.39999998	-4.72863193e-10
1.41999996	-6.56091237e-10
1.43999994	-2.38400355e-10
1.46000004	-2.13845244e-11
1.48000002	9.18966726e-12
1.5	2.31641269e-11
1.51999998	2.24941593e-11
1.53999996	4.07290486e-11
1.55999994	3.36662226e-11
1.57999992	4.548548e-11
1.60000002	-1.78983391e-12
1.62	113.037674
1.63999999	14.1031895
1.65999997	-26.6460304
1.67999995	-49.5755539
1.69999993	-57.2643661
1.72000003	-41.2289543
1.74000001	-63.9387512
1.75999999	-44.6231041
1.77999997	-28.9911499
1.79999995	-29.6349411
1.81999993	-16.1210918
1.84000003	-17.7143059
1.86000001	-9.52119255
1.88	1.24862266
1.89999998	2.39852166e-10
1.91999996	1.00826736e-10
1.93999994	2.45905823e-10
1.96000004	-1.42881484e-10
1.98000002	4.52560767e-11
2	-1.87547242e-10
2.01999998	-3.08228054e-10
2.03999996	-9.17435156e-11
2.05999994	-3.41929957e-11
2.07999992	-8.90793168e-12
2.0999999	3.81505418e-12
2.11999989	1.64555453e-11
2.13999987	6.37164002e-11
2.16000009	4.97751909e-11
2.18000007	6.53023208e-12
2.20000005	1.40900269e-12
2.22000003	-85.5584106
2.24000001	-62.7122574
2.25999999	-53.9267998
2.27999997	-66.5749893
2.29999995	-25.0849285
2.31999993	-25.0822239
2.33999991	-19.2711067
2.3599999	-14.9010305
2.37999988	-14.5594749
2.4000001	-15.1575069
2.42000008	-6.86339617
2.44000006	-4.69493532
2.46000004	-3.49657822
2.48000002	0.705475092
2.5	2.41441284e-10
2.51999998	-5.54438856e-11
2.53999996	1.90275434e-10
2.55999994	8.15534168e-11
2.57999992	-2.27577193e-11
2.5999999	-1.74084178e-10
2.61999989	-3.26627642e-10
2.63999987	-1.10526657e-11
2.66000009	3.53695337e-11
2.68000007	4.24957153e-11
2.70000005	1.1444532e-11
2.72000003	-1.0460478e-11
2.74000001	7.95535998e-11
2.75999999	4.93651266e-11
2.77999997	-1.00989237e-12
2.79999995	-2.3786151e-12
2.81999993	103.609695
2.83999991	82.4982376
2.8599999	16.9171486
2.87999988	-58.540947
2.9000001	-61.4211502
2.92000008	-62.1860466
2.94000006	-65.0116806
2.96000004	-38.5442505
2.98000002	-60.7679749
3	-44.9557762
3.01999998	-27.9599533
3.03999996	-22.9478798
3.05999994	-10.281106
3.07999992	1.27247107
3.0999999	2.37414283e-10
3.11999989	2.44835457e-10
3.13999987	-4.5936345e-11
3.16000009	-1.46789421e-11
3.18000007	-9.71723882e-11
3.20000005	-2.51701715e-10
3.22000003	-2.23412996e-10
3.24000001	-1.29363062e-10
3.25999999	3.81493587e-11
3.27999997	2.76811143e-11
3.29999995	-1.35796669e-11
3.31999993	2.13873537e-11
3.33999991	8.84889453e-11
3.3599999	3.04665425e-11
3.37999988	3.48968736e-11
3.4000001	-3.49439921e-12
3.42000008	22.608305
3.44000006	-95.0976257
3.46000004	-39.5352211
3.48000002	-49.3275032
3.5	-40.238308
3.51999998	-35.2589302
3.53999996	-29.9361305
3.55999994	-44.1105385
3.57999992	-62.2463188
3.5999999	3.87644815
3.61999989	-11.7308578
3.63999987	-7.01561356
3.66000009	-0.782854855
3.68000007	1.12171137
3.70000005	2.39606002e-10
3.72000003	1.36403749e-10
3.74000001	3.99467924e-11
3.75999999	-5.92096094e-11
3.77999997	-9.09408035e-11
3.79999995	-2.02993955e-10
3.81999993	-1.97306366e-10
3.83999991	-1.01040157e-11
3.8599999	-2.58389907e-11
3.87999988	4.37437369e-12
3.9000001	-3.30620947e-14
3.92000008	4.02535678e-11
3.94000006	1.8484313e-11
3.96000004	4.48083584e-11
3.98000002	-2.41369923e-12
4	-4.83641512e-12
4.01999998	-72.4909286
4.03999996	-77.5486679
4.05999994	-37.9784355
4.07999992	-30.3378735
4.0999999	-31.4336052
4.11999989	-20.4164371
4.13999987	0.615738153
4.15999985	-23.9963589
4.17999983	-8.94196701
4.19999981	38.7550316
4.21999979	-11.0946169
4.23999977	-9.73977566
4.25999975	-5.4391098
4.28000021	1.04767251
4.30000019	2.42066617e-10
4.32000017	-1.92817914e-10
4.34000015	1.60156971e-10
4.36000013	1.56532454e-10
4.38000011	3.78037254e-11
4.4000001	-2.32999231e-10
4.42000008	-2.03692757e-10
4.44000006	-2.96387949e-11
4.46000004	-2.24652727e-11
4.48000002	-1.36312767e-11
4.5	-3.73445719e-12
4.51999998	4.25390001e-11
4.53999996	2.74427946e-11
4.55999994	4.36814404e-11
4.57999992	-3.96648209e-12
4.5999999	-5.36947483e-12
4.61999989	-38.8885307
4.63999987	-81.9653854
4.65999985	-50.4556656
4.67999983	-25.0841503
4.69999981	-49.6251335
4.71999979	-40.9933128
4.73999977	-27.7197418
4.75999975	-25.9854584
4.78000021	-33.996891
4.80000019	-28.8310261
4.82000017	-28.8464375
4.84000015	-26.2333679
4.86000013	-32.2074165
4.88000011	0.647890389
4.9000001	2.51094506e-10
4.92000008	7.19483362e-10
4.94000006	-1.64808389e-10
4.96000004	1.80629262e-10
4.98000002	-9.06235573e-11
5	-4.113829e-10
5.01999998	-5.17933585e-10
5.03999996	-1.04013707e-10
5.05999994	-9.13986525e-11
5.07999992	-3.10999525e-11
5.0999999	3.24839079e-11
5.11999989	5.36989724e-13
5.13999987	4.422877e-11
5.15999985	4.68684883e-11
5.17999983	1.09809817e-11
5.19999981	-4.35689505e-12
5.21999979	84.5785828
5.23999977	-33.9170074
5.25999975	-48.534893
5.28000021	-53.8153915
5.30000019	-42.9721642
5.32000017	-51.095192
5.34000015	-52.5940247
5.36000013	-50.5219574
5.38000011	-48.9353218
5.4000001	-50.9158096
5.42000008	-37.8978119
5.44000006	-33.3472519
5.46000004	-21.8842239
5.48000002	1.45440555
5.5	2.43061848e-10
5.51999998	7.2694472e-12
5.53999996	1.10813594e-10
5.55999994	2.00618272e-10
5.57999992	-1.21642696e-10
5.5999999	-1.5158462e-10
5.61999989	-2.32521585e-10
5.63999987	-1.13750905e-10
5.65999985	-4.08192855e-11
5.67999983	2.74364975e-11
5.69999981	5.44851317e-12
5.71999979	1.5190918e-11
5.73999977	4.5284828e-11
5.75999975	5.94785887e-11
5.78000021	6.45051981e-12
5.80000019	-5.08428759e-12
5.82000017	78.3541183
5.84000015	-42.9301529
5.86000013	-58.206398
5.88000011	-13.7518349
5.9000001	-39.5666351
5.92000008	-41.482708
5.94000006	-50.4012146
5.96000004	-53.1593132
5.98000002	-52.6644821
6	-53.9571152
6.01999998	-38.1218033
6.03999996	-38.537384
6.05999994	-28.5574303
6.07999992	3.42577291
6.0999999	2.42557474e-10
6.11999989	2.32326935e-11
6.13999987	1.57774543e-10
6.15999985	9.96885907e-11
6.17999983	-6.44375525e-11
6.19999981	-2.83683022e-10
6.21999979	-1.91637387e-10
6.23999977	-1.37885562e-11
6.25999975	3.6032604e-11
6.28000021	2.86436586e-11
6.30000019	-1.14880796e-11
6.32000017	2.95983377e-11
6.34000015	6.07540129e-11
6.36000013	7.33932082e-11
6.38000011	1.97705272e-11
6.4000001	-5.65578183e-12
6.42000008	94.1665039
6.44000006	13.3638401
6.46000004	-22.2467079
6.48000002	-36.9353447
6.5	-13.3306417
6.51999998	-31.0394363
6.53999996	-34.5919647
6.55999994	-38.3799934
