# Supplementary material for: Universal Walking Control Framework of Biped Robot Based on Dynamic Model and Quadratic Programming
Source: Hindawi journal article supplement (doi:10.1155/2020/2789039), 2020-10-31
Supplement: f1 [file 2789039.f1.zip › sim/torque hip pitch]

0.0199999996	8.91051968e-05
0.0399999991	-0.13350144
0.0599999987	3.70313907
0.0799999982	12.3188009
0.099999994	65.1663437
0.120000005	27.848238
0.140000001	20.8153477
0.159999996	10.7770195
0.179999992	-0.668189287
0.200000003	-10.9919147
0.219999999	-14.9265985
0.239999995	-10.662837
0.25999999	4.42905903
0.280000001	10.6050167
0.300000012	10.7894974
0.320000023	11.2769985
0.340000004	11.9539022
0.360000014	6.66438293
0.380000025	-9.77490139
0.400000006	-29.726862
0.420000017	-70.3194962
0.439999998	-42.5722389
0.460000008	-25.1367416
0.480000019	-3.78608513
0.5	21.0743732
0.519999981	26.653223
0.539999962	32.8710098
0.560000002	16.8023567
0.579999983	10.3276453
0.599999964	8.22383881
0.620000005	-2.91340446
0.639999986	12.1962337
0.659999967	17.0806656
0.680000007	34.4100151
0.699999988	41.7510338
0.719999969	62.8109665
0.74000001	57.8699303
0.75999999	51.9939461
0.779999971	25.0874977
0.799999952	4.90673542
0.819999993	-15.4410915
0.839999974	-21.6893673
0.859999955	-9.65937519
0.879999995	-2.13396168
0.899999976	-0.403986514
0.919999957	1.59433579
0.939999998	2.38668013
0.959999979	-6.36737013
0.979999959	-28.3064651
1	-49.2397842
1.01999998	-207.672516
1.03999996	-141.330185
1.05999994	-105.021812
1.07999992	-57.5948639
1.10000002	4.17605591
1.12	32.7132835
1.13999999	44.0899925
1.15999997	24.4026375
1.17999995	23.0241699
1.19999993	16.9681892
1.22000003	14.219656
1.24000001	22.9734993
1.25999999	32.3342094
1.27999997	38.8349419
1.29999995	48.5071487
1.31999993	45.6464119
1.34000003	94.6307449
1.36000001	72.4162292
1.38	44.790451
1.39999998	14.1619368
1.41999996	-18.6580544
1.43999994	-18.8339481
1.46000004	-11.9084625
1.48000002	-7.82029057
1.5	-5.41373777
1.51999998	1.15890718
1.53999996	-7.68437672
1.55999994	-13.3390903
1.57999992	-39.7685738
1.60000002	-40.6495285
1.62	1.08241951
1.63999999	-145.743835
1.65999997	-142.300064
1.67999995	-65.8202133
1.69999993	-19.2955742
1.72000003	31.5500336
1.74000001	16.2348633
1.75999999	21.5350838
1.77999997	31.8048096
1.79999995	18.64748
1.81999993	-5.99343824
1.84000003	-6.83368015
1.86000001	25.198513
1.88	71.4634781
1.89999998	65.9392242
1.91999996	31.7925644
1.93999994	115.425163
1.96000004	106.514153
1.98000002	64.9406586
2	7.65990639
2.01999998	-32.7515221
2.03999996	-27.5211239
2.05999994	-25.2358665
2.07999992	-20.9478207
2.0999999	-13.3065672
2.11999989	-8.31093025
2.13999987	-10.3095207
2.16000009	-20.6976795
2.18000007	-41.879364
2.20000005	-45.4821663
2.22000003	-8.52407169
2.24000001	-108.27269
2.25999999	-150.013931
2.27999997	-85.667305
2.29999995	-15.5348415
2.31999993	4.17923832
2.33999991	20.0566177
2.3599999	33.6515541
2.37999988	38.8593292
2.4000001	27.1581039
2.42000008	-10.7609835
2.44000006	-4.08016968
2.46000004	24.5041065
2.48000002	65.4208755
2.5	65.3790741
2.51999998	30.6477833
2.53999996	118.6418
2.55999994	99.4541855
2.57999992	61.6617546
2.5999999	6.1464262
2.61999989	-28.421032
2.63999987	-27.0840569
2.66000009	-25.5572872
2.68000007	-17.7402248
2.70000005	-14.2500534
2.72000003	-8.10964203
2.74000001	-10.1246738
2.75999999	-20.6238899
2.77999997	-42.4385414
2.79999995	-45.250885
2.81999993	26.7535324
2.83999991	-131.057373
2.8599999	-164.651276
2.87999988	-163.504837
2.9000001	-40.016613
2.92000008	17.4825516
2.94000006	15.62848
2.96000004	18.8125114
2.98000002	32.0077362
3	33.0788956
3.01999998	-14.2757998
3.03999996	-4.97002029
3.05999994	26.4375038
3.07999992	65.5028687
3.0999999	65.1690369
3.11999989	47.3852005
3.13999987	94.7109985
3.16000009	105.154022
3.18000007	59.8273926
3.20000005	8.91298008
3.22000003	-17.0824623
3.24000001	-22.4803162
3.25999999	-24.1790886
3.27999997	-20.8245449
3.29999995	-15.0352154
3.31999993	-10.3264599
3.33999991	-10.3653479
3.3599999	-20.0455742
3.37999988	-45.8666267
3.4000001	-45.1050377
3.42000008	-10.1891232
3.44000006	-129.412491
3.46000004	-183.37883
3.48000002	-118.078674
3.5	-47.2173615
3.51999998	10.4113817
3.53999996	-4.56044674
3.55999994	12.8858862
3.57999992	20.4253521
3.5999999	9.5867281
3.61999989	-15.2129965
3.63999987	-2.91344452
3.66000009	28.0471687
3.68000007	65.6921997
3.70000005	65.0169067
3.72000003	25.602869
3.74000001	118.1259
3.75999999	101.486214
3.77999997	64.2548676
3.79999995	14.6476212
3.81999993	-29.4283295
3.83999991	-25.9155655
3.8599999	-20.0024223
3.87999988	-16.2968941
3.9000001	-12.9298582
3.92000008	-10.9188061
3.94000006	-9.86435509
3.96000004	-20.5039406
3.98000002	-41.3036842
4	-45.0906754
4.01999998	26.4572525
4.03999996	-171.20491
4.05999994	-145.597672
4.07999992	-111.406586
4.0999999	-49.5035744
4.11999989	2.92958689
4.13999987	1.16058731
4.15999985	14.5193501
4.17999983	35.4775009
4.19999981	29.7062092
4.21999979	-17.1740437
4.23999977	-3.71094799
4.25999975	27.5124512
4.28000021	65.7025452
4.30000019	64.9715958
4.32000017	33.7217865
4.34000015	113.68541
4.36000013	101.713364
4.38000011	61.2916336
4.4000001	7.90841198
4.42000008	-29.0667381
4.44000006	-28.8227959
4.46000004	-23.4587555
4.48000002	-17.3278904
4.5	-14.2006836
4.51999998	-9.02003288
4.53999996	-9.66309166
4.55999994	-19.8523026
4.57999992	-41.251255
4.5999999	-45.0581131
4.61999989	42.1565819
4.63999987	-194.103714
4.65999985	-196.811386
4.67999983	-84.3143005
4.69999981	-32.2988548
4.71999979	24.7417755
4.73999977	40.5189667
4.75999975	36.793335
4.78000021	40.0244713
4.80000019	23.1884041
4.82000017	-13.7485046
4.84000015	-7.39435005
4.86000013	29.8388786
4.88000011	69.2075043
4.9000001	64.9667892
4.92000008	34.305027
4.94000006	93.835434
4.96000004	112.09166
4.98000002	70.291275
5	7.38126183
5.01999998	-29.2380104
5.03999996	-22.7371807
5.05999994	-24.5270615
5.07999992	-19.0981598
5.0999999	-10.6623802
5.11999989	-9.49468422
5.13999987	-9.93123245
5.15999985	-20.6029034
5.17999983	-42.0702972
5.19999981	-45.0338249
5.21999979	14.7509527
5.23999977	-146.944321
5.25999975	-146.054825
5.28000021	-76.2368774
5.30000019	-36.2140045
5.32000017	19.9991837
5.34000015	28.3708801
5.36000013	32.0970459
5.38000011	34.8011093
5.4000001	26.9983425
5.42000008	-12.749402
5.44000006	-5.05500698
5.46000004	26.6693211
5.48000002	65.8352814
5.5	64.9407959
5.51999998	30.6292801
5.53999996	116.140388
5.55999994	110.84137
5.57999992	52.6215439
5.5999999	8.04254723
5.61999989	-30.3081284
5.63999987	-26.5576935
5.65999985	-22.4689713
5.67999983	-17.778717
5.69999981	-11.9897432
5.71999979	-9.91055965
5.73999977	-9.79196548
5.75999975	-20.7893734
5.78000021	-41.5150337
5.80000019	-45.0431328
5.82000017	43.4859009
5.84000015	-173.811508
5.86000013	-175.962051
5.88000011	-86.5429001
5.9000001	-41.8295441
5.92000008	14.469264
5.94000006	19.4289665
5.96000004	27.5902996
5.98000002	32.3598633
6	26.8562984
6.01999998	-13.5231895
6.03999996	-4.90828323
6.05999994	26.310154
6.07999992	82.8094864
6.0999999	64.9393234
6.11999989	34.4670486
6.13999987	112.2369
6.15999985	109.170189
6.17999983	65.1686249
6.19999981	7.96112347
6.21999979	-28.9323311
6.23999977	-27.8456688
6.25999975	-23.2325439
6.28000021	-17.7530727
6.30000019	-13.7508545
6.32000017	-8.42361832
6.34000015	-10.0792313
6.36000013	-20.5970764
6.38000011	-42.928215
6.4000001	-45.0918388
6.42000008	43.5539169
6.44000006	-154.918991
6.46000004	-174.246048
6.48000002	-98.3783722
6.5	-43.8455544
6.51999998	5.32566357
6.53999996	17.5014515
6.55999994	28.4183884
