# Supplementary material for: Universal Walking Control Framework of Biped Robot Based on Dynamic Model and Quadratic Programming
Source: Hindawi journal article supplement (doi:10.1155/2020/2789039), 2020-10-31
Supplement: f1 [file 2789039.f1.zip › sim/torque hip roll]

0.0199999996	6.13218333e-07
0.0399999991	-1.88669002
0.0599999987	-1.21838462
0.0799999982	-1.03914833
0.099999994	-10.3385372
0.120000005	-4.04589033
0.140000001	-2.69067979
0.159999996	-0.819418311
0.179999992	0.545529008
0.200000003	0.866375744
0.219999999	0.157151282
0.239999995	-0.85328722
0.25999999	-1.95119858
0.280000001	-1.8588618
0.300000012	-1.35880816
0.320000023	-1.24985564
0.340000004	-1.00013411
0.360000014	-0.427510411
0.380000025	0.969249547
0.400000006	-37.9125099
0.420000017	-81.8136749
0.439999998	-59.8012276
0.460000008	-53.5361099
0.480000019	-38.7806358
0.5	-35.9467545
0.519999981	-53.8462067
0.539999962	-55.5647697
0.560000002	-52.9654694
0.579999983	-69.2698059
0.599999964	-54.3136406
0.620000005	-79.2976227
0.639999986	-51.7657013
0.659999967	-43.2129364
0.680000007	1.53369629
0.699999988	2.39117241
0.719999969	-5.20216179
0.74000001	-7.2994442
0.75999999	-7.8017168
0.779999971	-3.59171724
0.799999952	-1.83168793
0.819999993	3.32657266
0.839999974	-1.45483875
0.859999955	-1.95610487
0.879999995	-2.63742828
0.899999976	-3.31179523
0.919999957	-3.17003369
0.939999998	-2.18800974
0.959999979	-0.15200305
0.979999959	1.72755444
1	-5.19600296
1.01999998	-149.054031
1.03999996	-65.51091
1.05999994	-69.9142761
1.07999992	-79.9418335
1.10000002	-55.1111221
1.12	-52.8156586
1.13999999	-52.5433159
1.15999997	-68.9851608
1.17999995	-67.7276993
1.19999993	-75.7169189
1.22000003	-80.3498917
1.24000001	-77.9969711
1.25999999	-34.3312607
1.27999997	8.53680706
1.29999995	1.38714302
1.31999993	-15.3546124
1.34000003	0.0259537697
1.36000001	-4.87903023
1.38	-6.29942846
1.39999998	-15.7976389
1.41999996	-10.8645849
1.43999994	-4.34215641
1.46000004	-0.745126307
1.48000002	-0.948696494
1.5	-1.10980034
1.51999998	-1.55642664
1.53999996	0.626002669
1.55999994	-0.28087908
1.57999992	3.28316498
1.60000002	1.83338714
1.62	-106.600807
1.63999999	-81.8328323
1.65999997	-71.8845062
1.67999995	-71.4207153
1.69999993	-68.1537933
1.72000003	-53.7551117
1.74000001	-76.8031311
1.75999999	-70.5742188
1.77999997	-66.8476715
1.79999995	-71.3969421
1.81999993	-32.3121834
1.84000003	-70.0505447
1.86000001	-36.8547516
1.88	10.5910997
1.89999998	3.86143947
1.91999996	-11.554306
1.93999994	-6.35844564
1.96000004	-13.4698935
1.98000002	1.18026757
2	-6.56020641
2.01999998	-5.60913563
2.03999996	-2.57600522
2.05999994	-3.83843946
2.07999992	-2.95462036
2.0999999	-2.81537008
2.11999989	-1.76279414
2.13999987	-0.670278668
2.16000009	-0.37735796
2.18000007	2.00286841
2.20000005	2.38789892
2.22000003	-132.339798
2.24000001	-137.953644
2.25999999	-61.9202843
2.27999997	-77.1803436
2.29999995	-63.3594589
2.31999993	-47.7353706
2.33999991	-56.9948654
2.3599999	-60.8617477
2.37999988	-66.3554764
2.4000001	-73.1322708
2.42000008	-51.1933441
2.44000006	-51.4836502
2.46000004	-30.6324043
2.48000002	2.3184278
2.5	3.71679664
2.51999998	-13.8209915
2.53999996	-3.81761074
2.55999994	-5.6731329
2.57999992	-5.93693352
2.5999999	-4.56924391
2.61999989	-3.49646282
2.63999987	-2.84351158
2.66000009	-3.14833117
2.68000007	-2.44256639
2.70000005	-3.32133627
2.72000003	-3.18051314
2.74000001	-0.669743001
2.75999999	-0.442014217
2.77999997	1.7253412
2.79999995	2.34479976
2.81999993	-1.39398956
2.83999991	-153.378677
2.8599999	-14.7885532
2.87999988	-95.7857056
2.9000001	-82.2742157
2.92000008	-85.5489883
2.94000006	-96.7714615
2.96000004	-73.0743179
2.98000002	-71.3250504
3	-73.3428421
3.01999998	-51.1727448
3.03999996	-57.8765488
3.05999994	-37.2504578
3.07999992	2.81345844
3.0999999	3.6652739
3.11999989	-5.31717587
3.13999987	-16.87393
3.16000009	-13.1269035
3.18000007	-8.81341076
3.20000005	-3.56135726
3.22000003	3.23254633
3.24000001	-2.65615749
3.25999999	-2.33667254
3.27999997	-4.58632088
3.29999995	-5.25963831
3.31999993	-2.38560057
3.33999991	-0.033790499
3.3599999	-1.02618623
3.37999988	3.11171031
3.4000001	2.31284571
3.42000008	-94.6358032
3.44000006	-117.840164
3.46000004	-67.9839706
3.48000002	-87.3506927
3.5	-58.8514404
3.51999998	-63.954319
3.53999996	-66.4460526
3.55999994	-58.9916801
3.57999992	-82.8045578
3.5999999	-63.1683769
3.61999989	-53.3300514
3.63999987	-53.3999977
3.66000009	-34.5043411
3.68000007	2.3495636
3.70000005	3.6606977
3.72000003	-10.0442762
3.74000001	-9.38918877
3.75999999	-12.9115877
3.77999997	-5.90344048
3.79999995	-2.5909164
3.81999993	-0.697169065
3.83999991	-1.09432483
3.8599999	-4.27105713
3.87999988	-3.59436297
3.9000001	-3.8044219
3.92000008	-1.10597086
3.94000006	-3.32553768
3.96000004	-0.930413306
3.98000002	1.74028265
4	2.28050828
4.01999998	-165.284286
4.03999996	-99.0100555
4.05999994	-48.4216537
4.07999992	-64.7592697
4.0999999	-70.8199844
4.11999989	-61.062973
4.13999987	-44.9476013
4.15999985	-67.9218597
4.17999983	-64.8467407
4.19999981	-49.8872261
4.21999979	-54.9594994
4.23999977	-53.8101387
4.25999975	-34.4029236
4.28000021	2.6577599
4.30000019	3.69257331
4.32000017	-18.6139374
4.34000015	-5.17404842
4.36000013	-3.23875904
4.38000011	-3.64363098
4.4000001	-5.25621319
4.42000008	-1.27892327
4.44000006	-2.65500569
4.46000004	-2.72258282
4.48000002	-2.42035294
4.5	-3.85928249
4.51999998	-1.07575762
4.53999996	-2.44559097
4.55999994	-0.862415791
4.57999992	1.76777828
4.5999999	2.26428795
4.61999989	-145.897308
4.63999987	-93.8191299
4.65999985	-51.7785492
4.67999983	-72.1037216
4.69999981	-81.3086853
4.71999979	-66.2329712
4.73999977	-61.8061943
4.75999975	-63.0425949
4.78000021	-71.5319748
4.80000019	-68.508522
4.82000017	-56.2810707
4.84000015	-51.2023697
4.86000013	-37.6127739
4.88000011	5.11895084
4.9000001	3.84880853
4.92000008	15.9020557
4.94000006	-34.2427597
4.96000004	-3.1557107
4.98000002	-12.1207008
5	-11.2080517
5.01999998	-8.96216202
5.03999996	-1.35201836
5.05999994	-4.04818058
5.07999992	-2.85145903
5.0999999	-2.2905035
5.11999989	-1.53514326
5.13999987	-0.857939839
5.15999985	-0.126154795
5.17999983	2.08008385
5.19999981	2.30062318
5.21999979	-131.84201
5.23999977	-64.9082184
5.25999975	-69.6371765
5.28000021	-84.5452881
5.30000019	-57.3213348
5.32000017	-56.6635628
5.34000015	-70.6976547
5.36000013	-72.5231857
5.38000011	-77.0286102
5.4000001	-79.6241531
5.42000008	-56.5882645
5.44000006	-58.9735107
5.46000004	-38.6078796
5.48000002	3.4885745
5.5	3.68025851
5.51999998	-15.6987762
5.53999996	-11.5772982
5.55999994	-0.127669334
5.57999992	-5.88820124
5.5999999	-3.96812987
5.61999989	-3.06886387
5.63999987	-3.58892202
5.65999985	-3.07587957
5.67999983	-1.07768357
5.69999981	-2.837605
5.71999979	-0.722632051
5.73999977	-0.336971134
5.75999975	0.515125811
5.78000021	1.89780498
5.80000019	2.28357673
5.82000017	-120.019524
5.84000015	-102.618401
5.86000013	-59.5825386
5.88000011	-46.8744431
5.9000001	-72.9359589
5.92000008	-54.7601166
5.94000006	-68.9495392
5.96000004	-75.0734406
5.98000002	-78.4539948
6	-79.3996964
6.01999998	-54.7747765
6.03999996	-57.7826462
6.05999994	-42.3378258
6.07999992	6.92525387
6.0999999	3.67381406
6.11999989	-15.0936623
6.13999987	-8.82739735
6.15999985	-4.51404095
6.17999983	-4.40651321
6.19999981	-6.56182098
6.21999979	0.44997263
6.23999977	-0.293249488
6.25999975	-1.40796208
6.28000021	-1.96451867
6.30000019	-3.85584974
6.32000017	-1.13675988
6.34000015	-1.5621146
6.36000013	0.811398029
6.38000011	2.86950254
6.4000001	2.28805518
6.42000008	-112.535904
6.44000006	-73.499733
6.46000004	-67.4458542
6.48000002	-44.9857483
6.5	-63.541317
6.51999998	-67.5292282
6.53999996	-64.9199905
6.55999994	-68.1729736
