# Supplementary material for: Universal Walking Control Framework of Biped Robot Based on Dynamic Model and Quadratic Programming
Source: Hindawi journal article supplement (doi:10.1155/2020/2789039), 2020-10-31
Supplement: f1 [file 2789039.f1.zip › sim/torque hip yaw]

0.0199999996	-1.49112168e-06
0.0399999991	0.0472297221
0.0599999987	0.151066303
0.0799999982	0.716451526
0.099999994	2.61820507
0.120000005	1.63538408
0.140000001	1.21964777
0.159999996	-0.0651133507
0.179999992	-1.61721563
0.200000003	-2.71778989
0.219999999	-3.07966971
0.239999995	-2.51137257
0.25999999	-1.08432436
0.280000001	-0.0977221653
0.300000012	0.410150915
0.320000023	0.502508879
0.340000004	0.531628847
0.360000014	0.42953521
0.380000025	0.539241672
0.400000006	-6.5059166
0.420000017	19.0156879
0.439999998	16.7564716
0.460000008	16.919342
0.480000019	5.73378229
0.5	4.55666971
0.519999981	5.26858091
0.539999962	5.02626371
0.560000002	8.63169384
0.579999983	7.673491
0.599999964	9.30426598
0.620000005	9.07019901
0.639999986	13.6832428
0.659999967	7.47294235
0.680000007	-3.21276259
0.699999988	-1.23543477
0.719999969	0.211700335
0.74000001	-0.772995889
0.75999999	0.274873435
0.779999971	0.444171429
0.799999952	1.69521999
0.819999993	-0.249803305
0.839999974	-1.60773325
0.859999955	-1.37850285
0.879999995	-1.79417741
0.899999976	-1.79475713
0.919999957	-1.27516329
0.939999998	-0.523068905
0.959999979	0.192586005
0.979999959	0.903419495
1	-2.19155431
1.01999998	-6.38217211
1.03999996	4.10257816
1.05999994	-1.36259103
1.07999992	14.5542679
1.10000002	19.9061451
1.12	-1.84527826
1.13999999	-2.9697094
1.15999997	5.76167345
1.17999995	11.3399372
1.19999993	12.9318695
1.22000003	16.8875294
1.24000001	16.1082821
1.25999999	6.09244108
1.27999997	-1.71332765
1.29999995	0.457475334
1.31999993	0.835730493
1.34000003	-1.44240236
1.36000001	-1.82575417
1.38	-4.10394478
1.39999998	-1.28276014
1.41999996	2.49563169
1.43999994	1.2393055
1.46000004	0.765678763
1.48000002	0.0763329864
1.5	-0.0426963829
1.51999998	-0.0913737342
1.53999996	0.239980578
1.55999994	-0.0530359522
1.57999992	1.5138737
1.60000002	1.81355035
1.62	19.158411
1.63999999	31.3843422
1.65999997	22.6229992
1.67999995	19.1138649
1.69999993	9.11819744
1.72000003	15.3991718
1.74000001	7.44044065
1.75999999	8.78474998
1.77999997	10.070776
1.79999995	-1.08975673
1.81999993	7.36918211
1.84000003	-7.36202097
1.86000001	-7.92051697
1.88	-2.01426673
1.89999998	0.196910679
1.91999996	3.32881641
1.93999994	2.18459678
1.96000004	4.27881908
1.98000002	1.33305383
2	-1.37174463
2.01999998	-1.16348922
2.03999996	-0.3119286
2.05999994	-1.5467422
2.07999992	-1.59151495
2.0999999	-1.36209476
2.11999989	-0.193034843
2.13999987	-0.321548045
2.16000009	-0.524543166
2.18000007	0.799471915
2.20000005	2.15945172
2.22000003	2.87517667
2.24000001	47.296032
2.25999999	21.8153114
2.27999997	10.0114737
2.29999995	37.6903534
2.31999993	53.5714645
2.33999991	14.1268024
2.3599999	-14.1348276
2.37999988	-13.9992981
2.4000001	-7.7218399
2.42000008	-6.87298584
2.44000006	-7.75144005
2.46000004	-5.12864733
2.48000002	-3.10972548
2.5	0.211638168
2.51999998	5.71529675
2.53999996	2.54112029
2.55999994	2.27011395
2.57999992	-0.238223106
2.5999999	-0.902090073
2.61999989	0.790121794
2.63999987	-1.51367223
2.66000009	-2.03617549
2.68000007	-1.42457414
2.70000005	-1.84747934
2.72000003	-0.545633495
2.74000001	-0.336088061
2.75999999	-0.998788714
2.77999997	0.632080734
2.79999995	2.13094735
2.81999993	3.49172449
2.83999991	-5.4337368
2.8599999	8.93822479
2.87999988	23.5507145
2.9000001	-9.66993904
2.92000008	-2.04861951
2.94000006	39.2499161
2.96000004	25.7301979
2.98000002	13.839983
3	4.72603369
3.01999998	-4.93709135
3.03999996	-6.19424057
3.05999994	-8.5434742
3.07999992	-4.75582075
3.0999999	0.199513316
3.11999989	1.07504094
3.13999987	3.62552762
3.16000009	1.79254138
3.18000007	0.40211314
3.20000005	1.04747486
3.22000003	3.71147585
3.24000001	1.43462265
3.25999999	-1.64888239
3.27999997	-3.60874438
3.29999995	-3.16417074
3.31999993	-0.979362845
3.33999991	-0.228972033
3.3599999	-0.521467865
3.37999988	0.853732526
3.4000001	2.12296391
3.42000008	13.7479229
3.44000006	17.5514145
3.46000004	27.9401588
3.48000002	33.8273849
3.5	4.18824387
3.51999998	4.65360069
3.53999996	1.39652145
3.55999994	-6.85512066
3.57999992	-6.08348274
3.5999999	-17.0896626
3.61999989	-6.13269615
3.63999987	-8.49847603
3.66000009	-9.75664139
3.68000007	-4.35243177
3.70000005	0.229272366
3.72000003	0.92296046
3.74000001	4.27526522
3.75999999	2.88784909
3.77999997	1.49084616
3.79999995	1.56854844
3.81999993	-0.0719968081
3.83999991	-0.654412389
3.8599999	-1.3463521
3.87999988	-1.61483943
3.9000001	-1.89559865
3.92000008	-0.383107841
3.94000006	-1.53234482
3.96000004	-1.05232084
3.98000002	0.737230957
4	2.09852266
4.01999998	36.7205582
4.03999996	11.1528187
4.05999994	18.6943684
4.07999992	32.9129677
4.0999999	16.7781906
4.11999989	14.9322481
4.13999987	-12.4791279
4.15999985	-20.8436165
4.17999983	-11.5458431
4.19999981	2.22824335
4.21999979	-4.30304527
4.23999977	-5.45318937
4.25999975	-6.67243814
4.28000021	-3.9772017
4.30000019	0.207327232
4.32000017	7.53718138
4.34000015	2.44633245
4.36000013	1.35905111
4.38000011	-0.469412595
4.4000001	0.0113029331
4.42000008	-0.517249763
4.44000006	-1.88053334
4.46000004	-1.36484528
4.48000002	-0.927688181
4.5	-1.97680068
4.51999998	-0.301885784
4.53999996	-0.791480184
4.55999994	-0.61213845
4.57999992	0.875030816
4.5999999	2.10365272
4.61999989	33.2443199
4.63999987	34.6980743
4.65999985	8.43523216
4.67999983	-1.68986702
4.69999981	6.99790001
4.71999979	28.2537537
4.73999977	0.798274219
4.75999975	5.96964788
4.78000021	7.90454578
4.80000019	4.62120008
4.82000017	-0.779432058
4.84000015	-2.86600089
4.86000013	-3.69702244
4.88000011	-2.09602761
4.9000001	0.182825193
4.92000008	-1.20042408
4.94000006	3.76785874
4.96000004	2.53566313
4.98000002	-0.414266199
5	0.716803551
5.01999998	1.23458004
5.03999996	0.862320781
5.05999994	-0.721073747
5.07999992	-1.02899945
5.0999999	-0.781134784
5.11999989	-0.196593791
5.13999987	-0.444332093
5.15999985	-0.744009078
5.17999983	0.565844834
5.19999981	2.13949847
5.21999979	36.4870262
5.23999977	15.5774403
5.25999975	21.5339851
5.28000021	21.2695866
5.30000019	47.9132156
5.32000017	25.3701515
5.34000015	-2.7242527
5.36000013	-9.16615677
5.38000011	-7.81253767
5.4000001	-5.65964746
5.42000008	-1.20179713
5.44000006	-3.66399384
5.46000004	-5.90232849
5.48000002	-4.9835906
5.5	0.208360255
5.51999998	6.3854785
5.53999996	2.02481413
5.55999994	0.845656693
5.57999992	1.18894589
5.5999999	-1.01847231
5.61999989	-1.2185452
5.63999987	-0.393035561
5.65999985	-0.89471674
5.67999983	-0.737533569
5.69999981	-1.17045975
5.71999979	0.0340922773
5.73999977	-0.0598198734
5.75999975	-0.678959906
5.78000021	0.526129067
5.80000019	2.11611557
5.82000017	35.0043678
5.84000015	36.5147781
5.86000013	35.4294281
5.88000011	23.0328884
5.9000001	18.0353298
5.92000008	-3.34839988
5.94000006	-19.6124554
5.96000004	-15.2411671
5.98000002	-4.05173016
6	1.59575307
6.01999998	-0.95173955
6.03999996	-1.73223877
6.05999994	-3.35714674
6.07999992	-10.3229275
6.0999999	0.202871755
6.11999989	5.56318378
6.13999987	1.78310978
6.15999985	2.92673612
6.17999983	1.079566
6.19999981	0.146102712
6.21999979	0.121178828
6.23999977	-0.400572419
6.25999975	-1.52044058
6.28000021	-1.74367332
6.30000019	-2.49394727
6.32000017	0.352869213
6.34000015	-0.870687902
6.36000013	-0.194235355
6.38000011	1.36873305
6.4000001	2.12677479
6.42000008	28.0881271
6.44000006	37.5917587
6.46000004	36.7050285
6.48000002	3.85823202
6.5	11.711216
6.51999998	22.4374332
6.53999996	2.08015203
6.55999994	-11.5800133
