# Supplementary material for: Universal Walking Control Framework of Biped Robot Based on Dynamic Model and Quadratic Programming
Source: Hindawi journal article supplement (doi:10.1155/2020/2789039), 2020-10-31
Supplement: f1 [file 2789039.f1.zip › sim/torque knee pitch]

0.0199999996	3.43154315e-05
0.0399999991	0.0923858061
0.0599999987	-1.79069817
0.0799999982	-5.51277065
0.099999994	-15.4204121
0.120000005	-4.47804117
0.140000001	-2.02023196
0.159999996	0.510215878
0.179999992	2.70143938
0.200000003	4.10745335
0.219999999	3.97566175
0.239999995	0.993568301
0.25999999	-5.16121864
0.280000001	-6.67699146
0.300000012	-5.85713243
0.320000023	-5.82369518
0.340000004	-5.14965487
0.360000014	-4.67164326
0.380000025	-6.15300655
0.400000006	201.587708
0.420000017	85.4906235
0.439999998	93.1954956
0.460000008	105.150208
0.480000019	89.894104
0.5	107.199722
0.519999981	122.192734
0.539999962	112.710442
0.560000002	97.4481812
0.579999983	117.58786
0.599999964	91.5974274
0.620000005	91.8682632
0.639999986	101.28862
0.659999967	74.1617584
0.680000007	9.53745556
0.699999988	5.35072565
0.719999969	-5.03674412
0.74000001	12.149231
0.75999999	15.7767963
0.779999971	11.9226494
0.799999952	10.0227146
0.819999993	5.39182949
0.839999974	-1.20778847
0.859999955	-11.5632048
0.879999995	-13.7466278
0.899999976	-11.8632765
0.919999957	-10.3076668
0.939999998	-8.72867107
0.959999979	-8.35602856
0.979999959	-11.2836609
1	6.80191708
1.01999998	3.76976776
1.03999996	-45.3402138
1.05999994	-22.0317497
1.07999992	18.2287674
1.10000002	91.6370544
1.12	101.833389
1.13999999	119.306122
1.15999997	119.909599
1.17999995	123.694923
1.19999993	119.427406
1.22000003	126.228378
1.24000001	129.343842
1.25999999	65.2961273
1.27999997	-6.50066757
1.29999995	1.4981761
1.31999993	-5.39071751
1.34000003	24.391119
1.36000001	24.4235268
1.38	23.9504967
1.39999998	14.873064
1.41999996	7.57530642
1.43999994	-11.0563726
1.46000004	-15.5638494
1.48000002	-13.29846
1.5	-11.7780867
1.51999998	-13.4620523
1.53999996	-11.0124598
1.55999994	-12.6256552
1.57999992	-15.4478989
1.60000002	-14.909585
1.62	300.590698
1.63999999	60.2253914
1.65999997	6.32684708
1.67999995	52.7497559
1.69999993	81.9673462
1.72000003	83.308876
1.74000001	91.0940094
1.75999999	96.6161041
1.77999997	120.454147
1.79999995	89.6276779
1.81999993	13.865859
1.84000003	-4.94770765
1.86000001	9.31546402
1.88	26.4824867
1.89999998	-2.15122271
1.91999996	-7.0649972
1.93999994	29.1094036
1.96000004	36.0973511
1.98000002	28.5057411
2	15.7736816
2.01999998	5.58437252
2.03999996	-13.9264059
2.05999994	-18.0688171
2.07999992	-16.5677757
2.0999999	-13.8576107
2.11999989	-14.2314873
2.13999987	-13.1853275
2.16000009	-13.9348783
2.18000007	-15.8453522
2.20000005	-16.301775
2.22000003	238.9543
2.24000001	125.319481
2.25999999	-21.2924442
2.27999997	27.2367172
2.29999995	78.1299515
2.31999993	68.0512924
2.33999991	92.0090332
2.3599999	113.338181
2.37999988	125.905289
2.4000001	105.157318
2.42000008	-1.90127516
2.44000006	-2.41173935
2.46000004	10.3689356
2.48000002	23.363203
2.5	-1.96371675
2.51999998	-8.57569122
2.53999996	31.2142982
2.55999994	33.1838951
2.57999992	28.0157623
2.5999999	15.0672245
2.61999989	6.66564131
2.63999987	-14.2638254
2.66000009	-18.6307125
2.68000007	-16.0595837
2.70000005	-13.7920799
2.72000003	-14.1195564
2.74000001	-13.30443
2.75999999	-13.8912086
2.77999997	-16.028429
2.79999995	-16.2277737
2.81999993	242.834961
2.83999991	94.9346008
2.8599999	-56.6042252
2.87999988	-57.6671982
2.9000001	11.6067123
2.92000008	51.3415031
2.94000006	78.6860657
2.96000004	99.4089203
2.98000002	121.56337
3	124.353775
3.01999998	-3.84365368
3.03999996	-1.64838028
3.05999994	12.3172312
3.07999992	23.7113609
3.0999999	-1.90657842
3.11999989	-1.50707281
3.13999987	21.0408726
3.16000009	34.4002495
3.18000007	26.0717525
3.20000005	16.5375404
3.22000003	9.17074776
3.24000001	-13.0083799
3.25999999	-18.1962566
3.27999997	-16.6518574
3.29999995	-14.0897551
3.31999993	-14.895998
3.33999991	-13.1631756
3.3599999	-13.7050943
3.37999988	-17.1496506
3.4000001	-16.1916046
3.42000008	238.415161
3.44000006	63.8587189
3.46000004	-48.4811668
3.48000002	-32.7786903
3.5	3.26235294
3.51999998	37.5799179
3.53999996	30.2220402
3.55999994	69.7934341
3.57999992	96.1639023
3.5999999	60.1089706
3.61999989	-3.09962416
3.63999987	-0.109494686
3.66000009	13.5699463
3.68000007	23.922863
3.70000005	-1.90699053
3.72000003	-11.4288502
3.74000001	31.3138313
3.75999999	33.091938
3.77999997	28.4210911
3.79999995	16.4309578
3.81999993	6.124228
3.83999991	-13.5877428
3.8599999	-17.5618076
3.87999988	-15.5664902
3.9000001	-13.5105257
3.92000008	-14.7072134
3.94000006	-13.4428654
3.96000004	-13.8660278
3.98000002	-15.6515465
4	-16.1792679
4.01999998	300.351898
4.03999996	32.5884132
4.05999994	-32.9434624
4.07999992	-10.0021152
4.0999999	4.67184639
4.11999989	32.8789024
4.13999987	44.285759
4.15999985	68.7446747
4.17999983	114.006264
4.19999981	112.74942
4.21999979	-3.99215889
4.23999977	-0.34432888
4.25999975	13.5016699
4.28000021	24.010952
4.30000019	-1.89697242
4.32000017	-9.02843285
4.34000015	30.6468964
4.36000013	33.7324829
4.38000011	27.5014324
4.4000001	15.2273006
4.42000008	6.35503054
4.44000006	-15.14431
4.46000004	-18.2672806
4.48000002	-15.809906
4.5	-14.0133076
4.51999998	-14.1081781
4.53999996	-13.3119907
4.55999994	-13.7860622
4.57999992	-15.6405115
4.5999999	-16.1546516
4.61999989	313.336792
4.63999987	0.386358738
4.65999985	-75.263237
4.67999983	-9.18159294
4.69999981	26.8817825
4.71999979	84.3877411
4.73999977	125.984146
4.75999975	131.334579
4.78000021	132.18689
4.80000019	108.187134
4.82000017	-1.89028168
4.84000015	-3.15898609
4.86000013	14.9738884
4.88000011	26.3807526
4.9000001	-1.88548672
4.92000008	-4.6202631
4.94000006	21.6742096
4.96000004	36.7730217
4.98000002	30.4846954
5	14.8028049
5.01999998	5.68923616
5.03999996	-13.4807119
5.05999994	-17.893755
5.07999992	-16.5353546
5.0999999	-13.2673531
5.11999989	-14.5335169
5.13999987	-13.3612204
5.15999985	-14.0655537
5.17999983	-15.8913717
5.19999981	-16.1412544
5.21999979	322.687561
5.23999977	-4.3711586
5.25999975	15.4534206
5.28000021	34.2594299
5.30000019	64.10466
5.32000017	84.284935
5.34000015	103.16713
5.36000013	113.685806
5.38000011	122.925591
5.4000001	106.232101
5.42000008	-1.60242701
5.44000006	-0.913473606
5.46000004	13.1137333
5.48000002	24.1303768
5.5	-1.86381829
5.51999998	-10.1266956
5.53999996	30.5425949
5.55999994	38.8688354
5.57999992	23.9834061
5.5999999	15.344902
5.61999989	5.85965252
5.63999987	-14.4484243
5.65999985	-17.8823128
5.67999983	-16.0792999
5.69999981	-13.3855276
5.71999979	-14.6627674
5.73999977	-13.3164787
5.75999975	-14.0679893
5.78000021	-15.7014475
5.80000019	-16.1510677
5.82000017	335.075623
5.84000015	37.2429962
5.86000013	-47.5516472
5.88000011	-14.0133171
5.9000001	22.866909
5.92000008	56.5323868
5.94000006	79.1515579
5.96000004	102.427704
5.98000002	120.871605
6	109.856621
6.01999998	-2.20683813
6.03999996	-0.714659691
6.05999994	13.0463467
6.07999992	34.6697311
6.0999999	-1.86857152
6.11999989	-7.68638611
6.13999987	30.3220387
6.15999985	35.4462662
6.17999983	28.4398079
6.19999981	14.8621063
6.21999979	6.02687216
6.23999977	-14.9737415
6.25999975	-18.3241367
6.28000021	-16.1013756
6.30000019	-13.9905624
6.32000017	-14.2640285
6.34000015	-13.0675163
6.36000013	-13.9219589
6.38000011	-16.2064209
6.4000001	-16.169733
6.42000008	332.679779
6.44000006	39.3554993
6.46000004	-12.8088837
6.48000002	-29.7070389
6.5	14.5756178
6.51999998	54.1813507
6.53999996	81.0623779
6.55999994	106.888611
