# Supplementary figures and images for: Universal Walking Control Framework of Biped Robot Based on Dynamic Model and Quadratic Programming
Source: Hindawi journal article supplement (doi:10.1155/2020/2789039), 2020-10-31

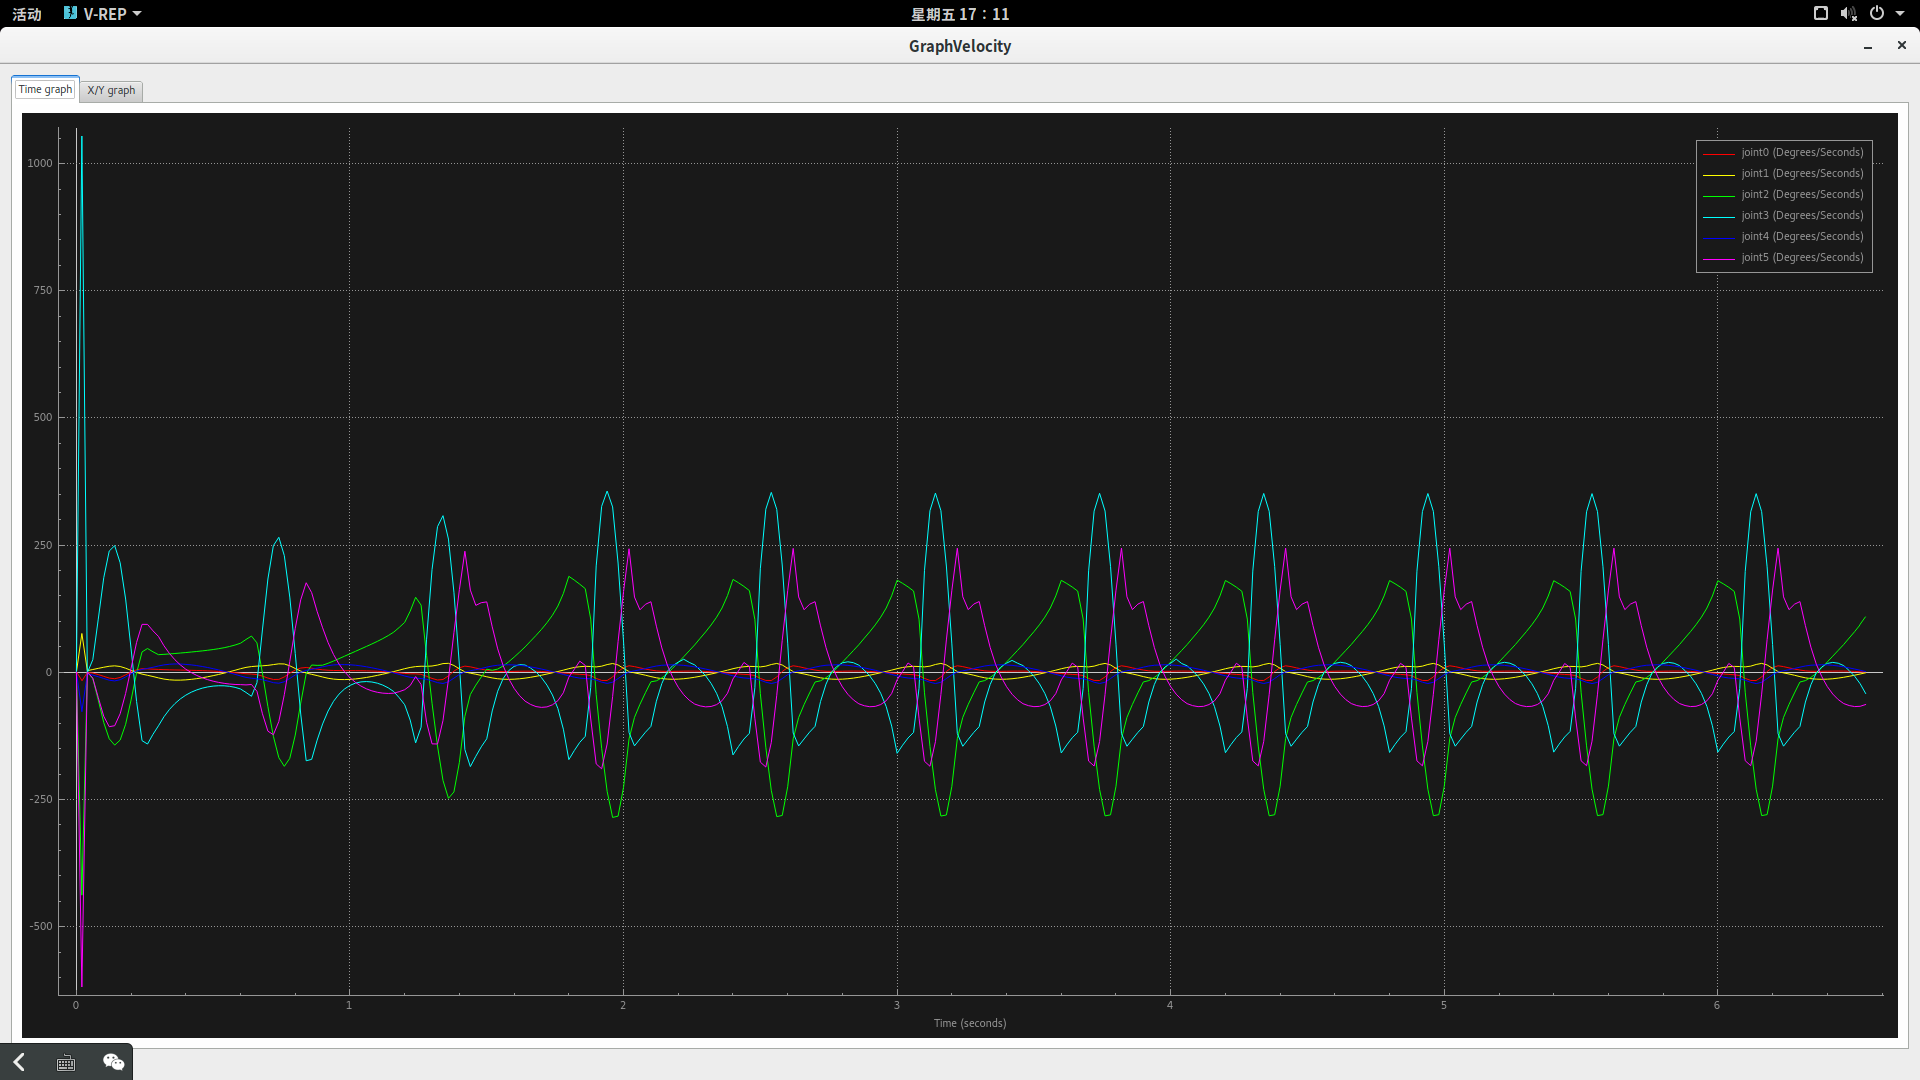

Supplement: f1 [file 2789039.f1.zip › sim/speed.png]

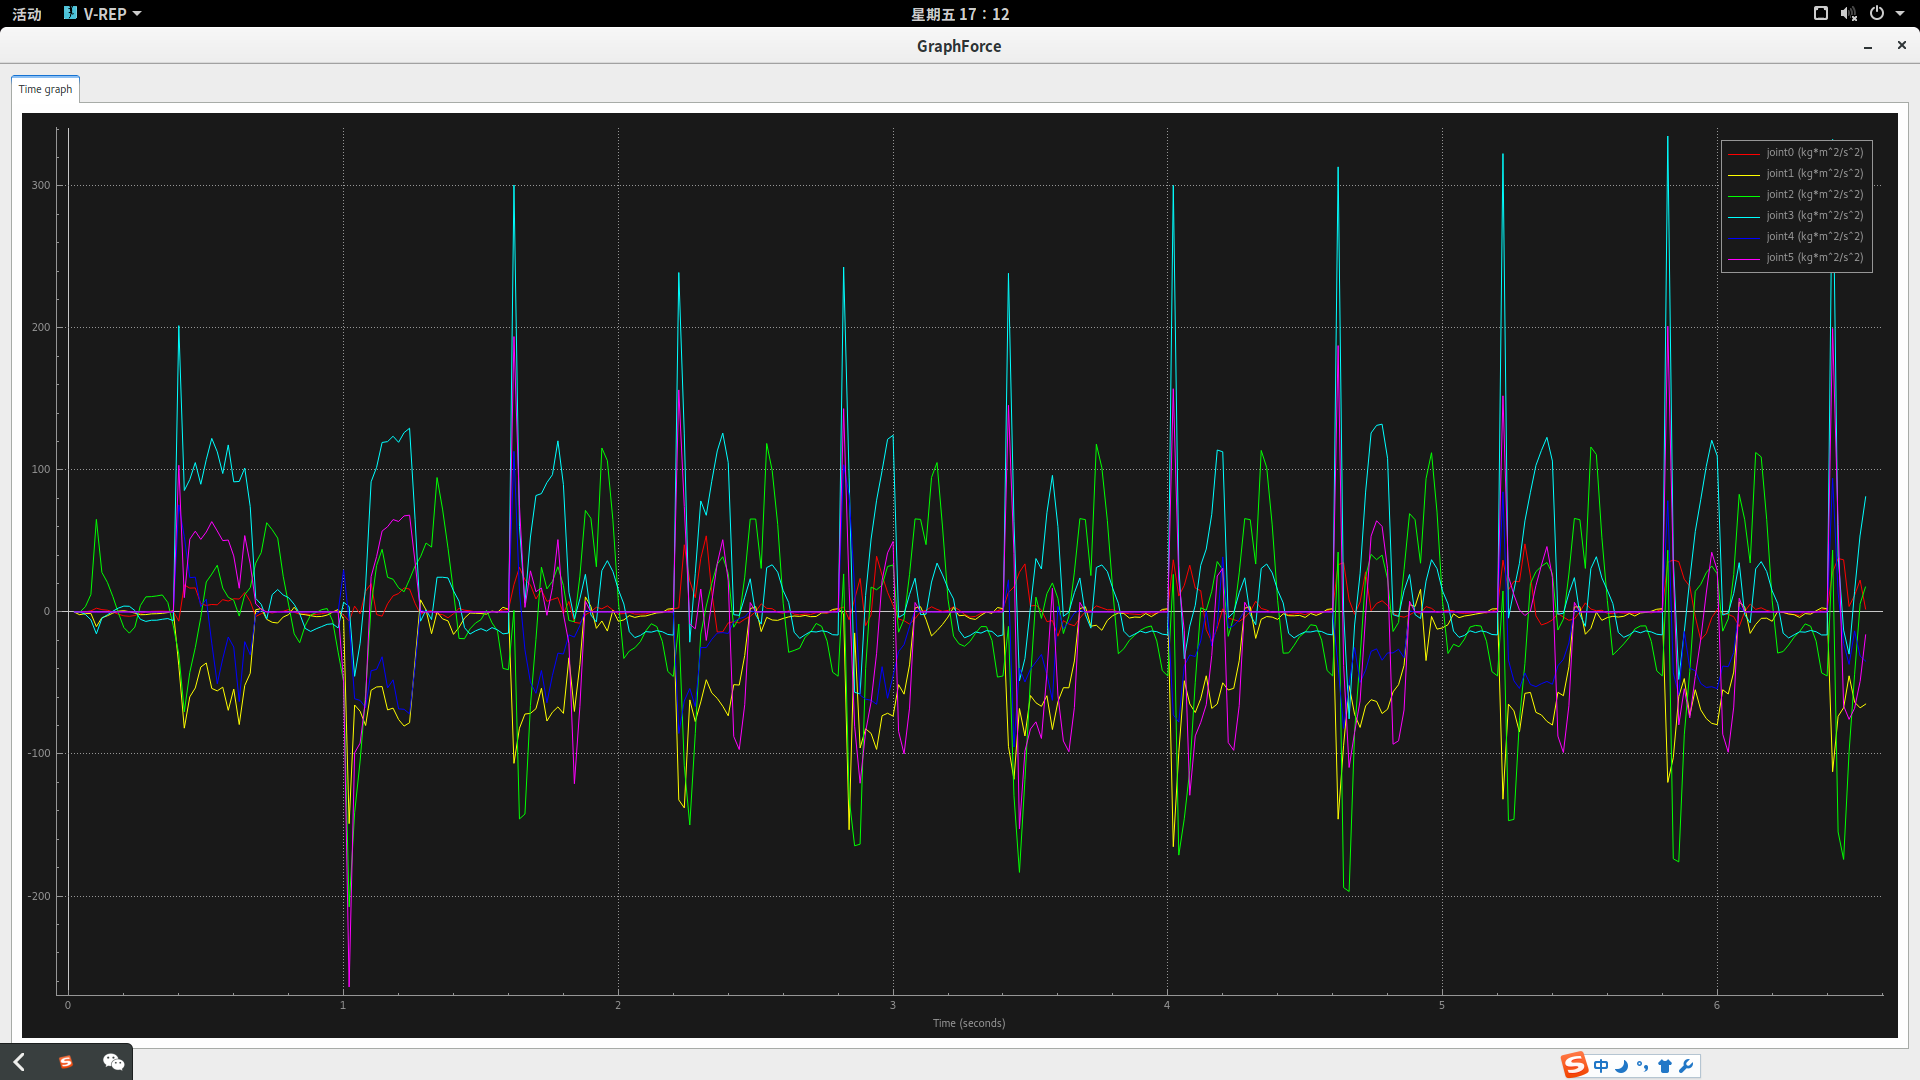

Supplement: f1 [file 2789039.f1.zip › sim/Torque.png]
